# Supplementary material
Source: PubMed Central journal article supplement (PMC2747361)

**Enantioselective Synthesis of Indolizidines Bearing Quaternary Substituted Stereocenters via Rhodium-Catalyzed [2+2+2] Cycloaddition of Alkenyl Isocyanates and Terminal Alkynes**

Ernest E. Lee and Tomislav Rovis\*

*Department of Chemistry, Colorado State University, Fort Collins, Colorado 80523.*

E-mail: [rovis@lamar.colostate.edu](mailto:rovis@lamar.colostate.edu)

**Supporting Information**

|      |                                                                                             |    |
|------|---------------------------------------------------------------------------------------------|----|
| I.1  | General Methods.....                                                                        | 2  |
| I.1  | Starting material synthesis.....                                                            | 3  |
| I.2  | Procedures for alkenyl acid synthesis.....                                                  | 4  |
| I.3  | <sup>1</sup> H and <sup>13</sup> C NMR Spectra for new carboxylic acids.....                | 6  |
| I.4  | General procedure for isocyanate synthesis.....                                             | 13 |
| I.5  | Isocyanate <sup>1</sup> H and <sup>13</sup> C NMR Spectra.....                              | 16 |
| I.6  | Synthesis of Ligands.....                                                                   | 25 |
| I.7  | <sup>1</sup> H and <sup>13</sup> C NMR Spectra for New Ligands.....                         | 27 |
| I.8  | General procedure for [2+2+2] cycloadditions with Aryl Alkynes.....                         | 30 |
| I.9  | <sup>1</sup> H and <sup>13</sup> C NMR Spectra for [2+2+2] Products from Aryl Alkynes.....  | 35 |
| I.10 | General procedure for [2+2+2] cycloadditions with Alkyl Alkynes.....                        | 48 |
| I.11 | <sup>1</sup> H and <sup>13</sup> C NMR Spectra for [2+2+2] Products from Alkyl Alkynes..... | 52 |
| I.12 | Characterization of Pyridone Side Products.....                                             | 61 |
| I.13 | Determination of Pyridone Isomer.....                                                       | 62 |
| I.14 | Pyridone Byproduct <sup>1</sup> H and <sup>13</sup> C NMR Spectra.....                      | 63 |

## ***1.1 General Methods***

Toluene, tetrahydrofuran, ether, and dichloromethane were degassed with argon and passed through one column of neutral alumina and one column of Q5 reactant. Triethylamine (peptide synthesis grade) was purchased from Fisher Scientific and used without further purification. Flash column chromatography was carried out on silica gel (60 Å, 230 - 400 mesh, obtained from Silicycle Inc.) and was performed with reagent grade solvents. Analytical thin-layer chromatography (TLC) was performed on Silicycle glass-backed silica gel plates (60 Å, 0.25 mm, purchased from Silicycle Inc.), visualized with a UV lamp (254 nm) and/or potassium permanganate.

Infrared spectra (IR) were obtained on a Nicolet Avatar 320 FT-IR spectrometer. <sup>1</sup>H NMR and <sup>13</sup>C NMR were obtained on Varian Unity 300 and Unity 400 spectrometers. Chemical shifts are expressed in ppm values. Proton chemical shifts in CDCl<sub>3</sub> were referenced to 7.26 ppm (CHCl<sub>3</sub>) or 0.00 ppm (TMS). Carbon chemical shifts were referenced to 77.2 ppm (CDCl<sub>3</sub>). Peak multiplicities are designated by the following abbreviations: s, singlet; d, doublet; t, triplet; q, quartet; m, multiplet; dd, doublet of doublets; dt, doublet of triplet; b, broad; *J*, coupling constant in Hz. Low resolution mass spectra (MS) and high resolution mass spectra (HRMS) were recorded on a Fisons VG Autospec spectrometer. HPLC spectra were obtained on an Agilent 1100 series system. Optical rotation was obtained with an Autopol-III automatic polarimeter. Melting points were obtained on a Fisher-Johns melting point apparatus and are uncorrected. References following the compound names indicate literature articles where the compound has been previously been reported.

Unless otherwise indicated, commercially available starting materials were purchased from Aldrich Chemicals. [Rh(ethylene)<sub>2</sub>Cl]<sub>2</sub> was purchased from Strem Chemicals. Commercially available ligand **L3** was prepared from diethyl-tartrate according to literature procedures.

## 1.1 Starting material synthesis

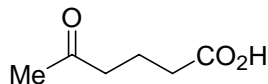

**5-Oxo-hexanoic acid:** commercially available.

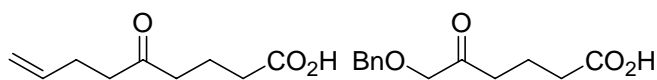

**5-Oxo-non-8-enoic acid** and **5-Benzyloxymethyl-hex-5-enoic acid** were prepared as described: Meyers, A. I.; Andres, C. J.; Resek, J. E.; Woodall, C. C.; McLaughlin, M. A.; Lee, P. H.; Price, D. A. *Tetrahedron* **1999**, 55, 8931-8952.

The remaining keto-acids were synthesized as follows:

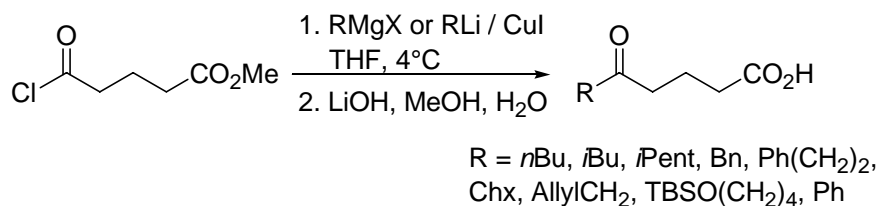

In a flame dried flask under Ar atmosphere, a solution of Grignard (1.0M in THF or Et<sub>2</sub>O, 14.5 mL, 14.5 mmol) or *n*-BuLi (for R = *n*Bu, 1.6M, 9.0 mL) was slowly added to a stirring suspension of copper(I) iodide (1.38 g, 7.24 mmol) in THF (30 mL) at 4 °C. After 30 minutes, methyl 5-chloro-5-oxo-valerate (1.00 mL, 7.24 mmol) was added. The reaction was stirred at 4 °C for 3 hours and then quenched with 1M HCl, extracted (Et<sub>2</sub>Ox3), dried over MgSO<sub>4</sub>, filtered and concentrated *in vacuo*. The keto-ester was purified by flash chromatography (Hexanes:EtOAc;93:7). The keto-ester (0.2 M) was then added to a stirring suspension of LiOH (5 eq) in MeOH/H<sub>2</sub>O (3/1) and stirred at room temperature for 16 hours. The reaction was then quenched with 1M HCl, extracted (Et<sub>2</sub>Ox3), dried over MgSO<sub>4</sub>, filtered and concentrated *in vacuo*. If suitably pure, the crude keto-acid was carried forward to the next step. If not suitably pure, the keto-acid was purified by silica gel flash chromatography (Hexanes:EtOAc4:1).

## I.2 Procedures for alkenyl acid synthesis

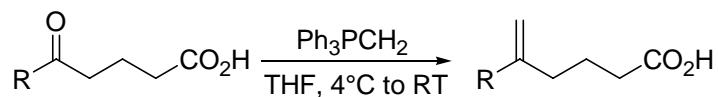

In a flame dried flask under Ar atmosphere, *n*-BuLi (1.6M in hexanes, 5.63 mL, 9.0 mmol) was added to a stirring solution of methyltriphenylphosphonium bromide (3.21 g, 9.0 mmol) in THF (40 mL) at 4 °C. After stirring for 1 hour, ketoacid (3.0 mmol) was added dropwise to the bright orange solution. The reaction was then warmed to room temperature and stirred overnight. The reaction was then quenched with 1M HCl, extracted (Et<sub>2</sub>Ox3), dried over MgSO<sub>4</sub>, filtered and concentrated *in vacuo*. The crude material was then purified by silica gel flash chromatography.

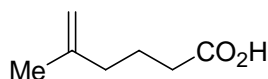

**5-Methyl-hex-5-enoic acid:** Flash Chromatography (Hexanes:EtOAc;4:1) yielded a clear liquid (67%).  $R_f = 0.32$  (Hexanes:EtOAc;3:1); IR (Thin Film)  $\nu$  3076, 2939, 1709, 1414, 1292, 1239, 890  $\text{cm}^{-1}$ ; <sup>1</sup>H NMR (400 MHz, CDCl<sub>3</sub>)  $\delta$  4.72 (1H, s), 4.67 (1H, s), 2.33 (2H, t,  $J = 7.5$  Hz), 2.04 (2H, t,  $J = 7.5$  Hz), 1.76 (2H, tt,  $J = 7.5, 7.5$  Hz), 1.69 (3H, s); <sup>13</sup>C NMR (100 MHz, CDCl<sub>3</sub>)  $\delta$  180.6, 144.7, 111.0, 37.1, 33.6, 22.6, 22.4.

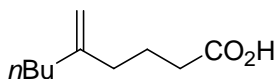

**5-Methylene-nonanoic acid:** Flash Chromatography (Hexanes:EtOAc;4:1) yielded a clear liquid (47%).  $R_f = 0.25$  (Hexanes:EtOAc;3:1); <sup>1</sup>H NMR (400 MHz, CDCl<sub>3</sub>)  $\delta$  4.72 (1H, s), 4.69 (1H, s), 2.33 (2H, t,  $J = 7.0$  Hz), 2.04 (2H, t,  $J = 7.5$  Hz), 1.98 (2H, t,  $J = 7.5$  Hz), 1.75 (2H, tt,  $J = 7.5, 7.5$  Hz), 1.41-1.22 (4H, m), 0.88 (3H, t,  $J = 7.5$  Hz); <sup>13</sup>C NMR (125 MHz, CDCl<sub>3</sub>)  $\delta$  180.5, 148.9, 109.7, 35.7, 35.4, 33.7, 30.1, 22.8, 22.7, 14.2.

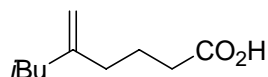

**7-Methyl-5-methylene-octanoic acid:** Flash Chromatography (Hexanes:EtOAc;4:1) yielded a clear liquid (56%).  $R_f = 0.20$  (Hexanes:EtOAc;3:1); IR (Thin Film)  $\nu$  2958, 1709, 1410, 1368  $\text{cm}^{-1}$ ; <sup>1</sup>H NMR (400 MHz, CDCl<sub>3</sub>)  $\delta$  4.73 (1H, s), 4.70 (1H, s), 2.34 (2H, t,  $J = 7.0$  Hz), 2.01 (2H, t,  $J = 7.5$  Hz), 1.85 (2H, d,  $J = 7.0$  Hz), 1.79-1.67 (3H, m), 0.84 (6H, d,  $J = 7.0$  Hz); <sup>13</sup>C NMR (100 MHz, CDCl<sub>3</sub>)  $\delta$  180.1, 147.6, 111.2, 45.9, 35.0, 33.7, 26.2, 22.7, 22.7.

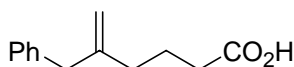

**5-Benzyl-hex-5-enoic acid:** Flash Chromatography (Hexanes:EtOAc;4:1) yielded a clear liquid (60%).  $R_f = 0.35$  (Hexanes:EtOAc;4:1); IR (Thin Film)  $\nu$  3027, 2934, 1708, 1495,

1453, 1243, 896  $\text{cm}^{-1}$ ;  $^1\text{H}$  NMR (400 MHz,  $\text{CDCl}_3$ )  $\delta$  7.31-7.26 (2H, m), 7.24-7.17 (3H, m), 4.86 (1H, s), 4.81 (1H, s), 3.34 (2H, s), 2.34 (2H, t,  $J = 7.0$  Hz), 2.03 (2H, t,  $J = 7.5$  Hz), 1.79 (2H, tt,  $J = 7.0, 7.0$  Hz);  $^{13}\text{C}$  NMR (100 MHz,  $\text{CDCl}_3$ )  $\delta$  180.5, 147.9, 139.7, 129.2, 128.5, 126.4, 112.3, 43.0, 34.7, 33.7, 22.6.

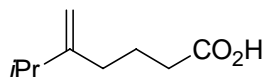

**6-Methyl-5-methyleneheptanoic acid:** Flash Chromatography (Hexanes:EtOAc;4:1) yielded a clear liquid (35%).  $R_f = 0.20$  (Hexanes:EtOAc;3:1); IR (Thin Film)  $\nu$  2963, 1709, 1462, 1288  $\text{cm}^{-1}$ ;  $^1\text{H}$  NMR (400 MHz,  $\text{CDCl}_3$ )  $\delta$  4.76 (1H, s), 4.67 (1H, s), 2.35 (2H, t,  $J = 7.5$  Hz), 2.20 (1H, sext,  $J = 7.5$  Hz), 2.06 (2H, t,  $J = 7.5$  Hz), 1.77 (2H, tt,  $J = 7.0, 7.0$  Hz), 1.00 (6H, d,  $J = 7.0$  Hz);  $^{13}\text{C}$  NMR (125 MHz,  $\text{CDCl}_3$ )  $\delta$  180.6, 154.8, 107.3, 33.8, 33.7, 23.1, 21.9.

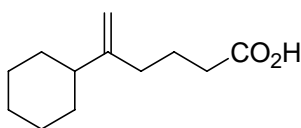

**5-Cyclohexylhex-5-enoic acid:** Flash Chromatography (Hexanes:EtOAc;4:1) yielded a clear liquid (38%).  $R_f = 0.22$  (Hexanes:EtOAc;3:1); IR (Thin Film)  $\nu$  2926, 2852, 1709, 1640, 1449, 1262  $\text{cm}^{-1}$ ;  $^1\text{H}$  NMR (300 MHz,  $\text{CDCl}_3$ )  $\delta$  4.80 (1H, s), 4.75 (1H, s), 2.42 (2H, t,  $J = 7.5$  Hz), 2.12 (2H, t,  $J = 7.5$  Hz), 1.88-1.68 (7H, m), 1.34-1.14 (5H, m);  $^{13}\text{C}$  NMR (100 MHz,  $\text{CDCl}_3$ )  $\delta$  180.6, 154.1, 107.8, 44.1, 34.3, 33.8, 32.6, 26.9, 26.5, 23.2.

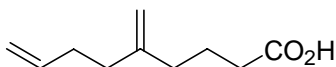

**5-Methylene-non-8-enoic acid:** Flash Chromatography (Hexanes:EtOAc;4:1) yielded a clear liquid (58%).  $R_f = 0.26$  (Hexanes:EtOAc;3:1); IR (Thin Film)  $\nu$  2934, 1709, 1643, 1414, 1289  $\text{cm}^{-1}$ ;  $^1\text{H}$  NMR (400 MHz,  $\text{CDCl}_3$ )  $\delta$  5.79 (1H, ddd,  $J = 17.0, 10.0$  Hz), 5.00 (1H, dt,  $J = 17.0, 1.0$  Hz), 4.93 (1H, d,  $J = 10.0$  Hz), 4.75 (1H, s), 4.73 (1H, s), 2.34 (2H, t,  $J = 8.0$  Hz), 2.16 (2H, dt,  $J = 7.5, 7.5$  Hz), 2.09 (2H, t,  $J = 8.0$  Hz), 2.05 (2H, t,  $J = 8.0$  Hz), 1.76 (2H, tt,  $J = 7.5, 7.5$  Hz);  $^{13}\text{C}$  NMR (100 MHz,  $\text{CDCl}_3$ )  $\delta$  180.4, 147.9, 138.5, 114.8, 110.2, 35.4, 35.3, 33.7, 32.1, 22.7; HRMS (EI)  $m/e$  calcd ( $\text{M}^+$ ) 169.1233, found 169.1229.

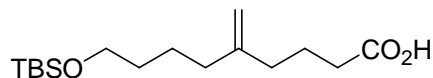

**9-(tert-Butyl-dimethyl-silyloxy)-5-methylene-nonanoic acid:** Flash Chromatography (Hexanes:EtOAc;4:1) yielded a clear liquid (60%).  $R_f = 3.20$  (Hexanes:EtOAc;3:1); IR (Thin Film)  $\nu$  2930, 1710, 1412, 1255, 1104, 836  $\text{cm}^{-1}$ ;  $^1\text{H}$  NMR (300 MHz,  $\text{CDCl}_3$ )  $\delta$  4.77 (1H, s), 4.75 (1H, s), 3.63 (2H, t,  $J = 8.0$  Hz), 2.37 (2H, t,  $J = 7.5$  Hz), 2.08 (2H, t,  $J = 7.5$  Hz), 2.03 (2H, t,  $J = 7.5$  Hz), 1.80 (2H, tt,  $J = 7.5, 7.5$  Hz), 1.60-1.40 (4H, m), 0.91 (9H, s), 0.06 (6H, s);  $^{13}\text{C}$  NMR (100 MHz,  $\text{CDCl}_3$ )  $\delta$  180.2, 148.6, 110.0, 63.3, 35.7, 35.3, 33.7, 32.7, 26.2, 24.2, 22.9, 18.6, -5.0; HRMS (EI)  $m/e$  calcd ( $\text{M}^+$ ) 301.2199, found 301.2188.

I.3  $^1\text{H}$  and  $^{13}\text{C}$  NMR Spectra for new carboxylic acids

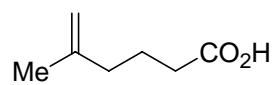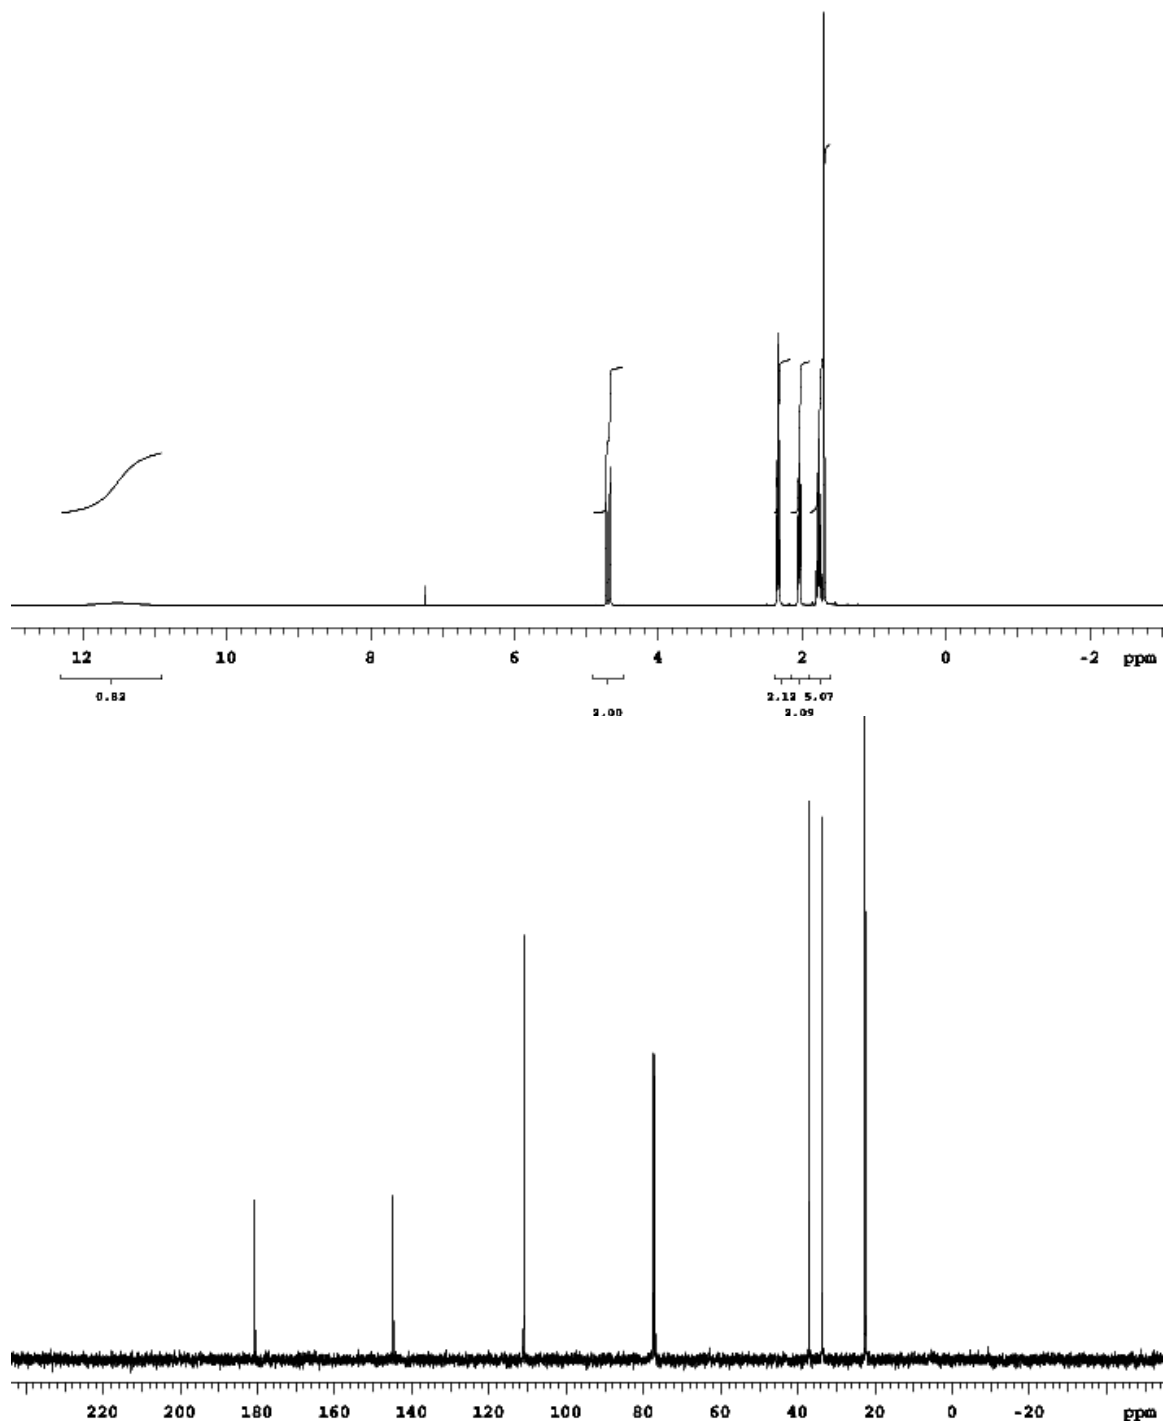

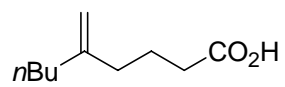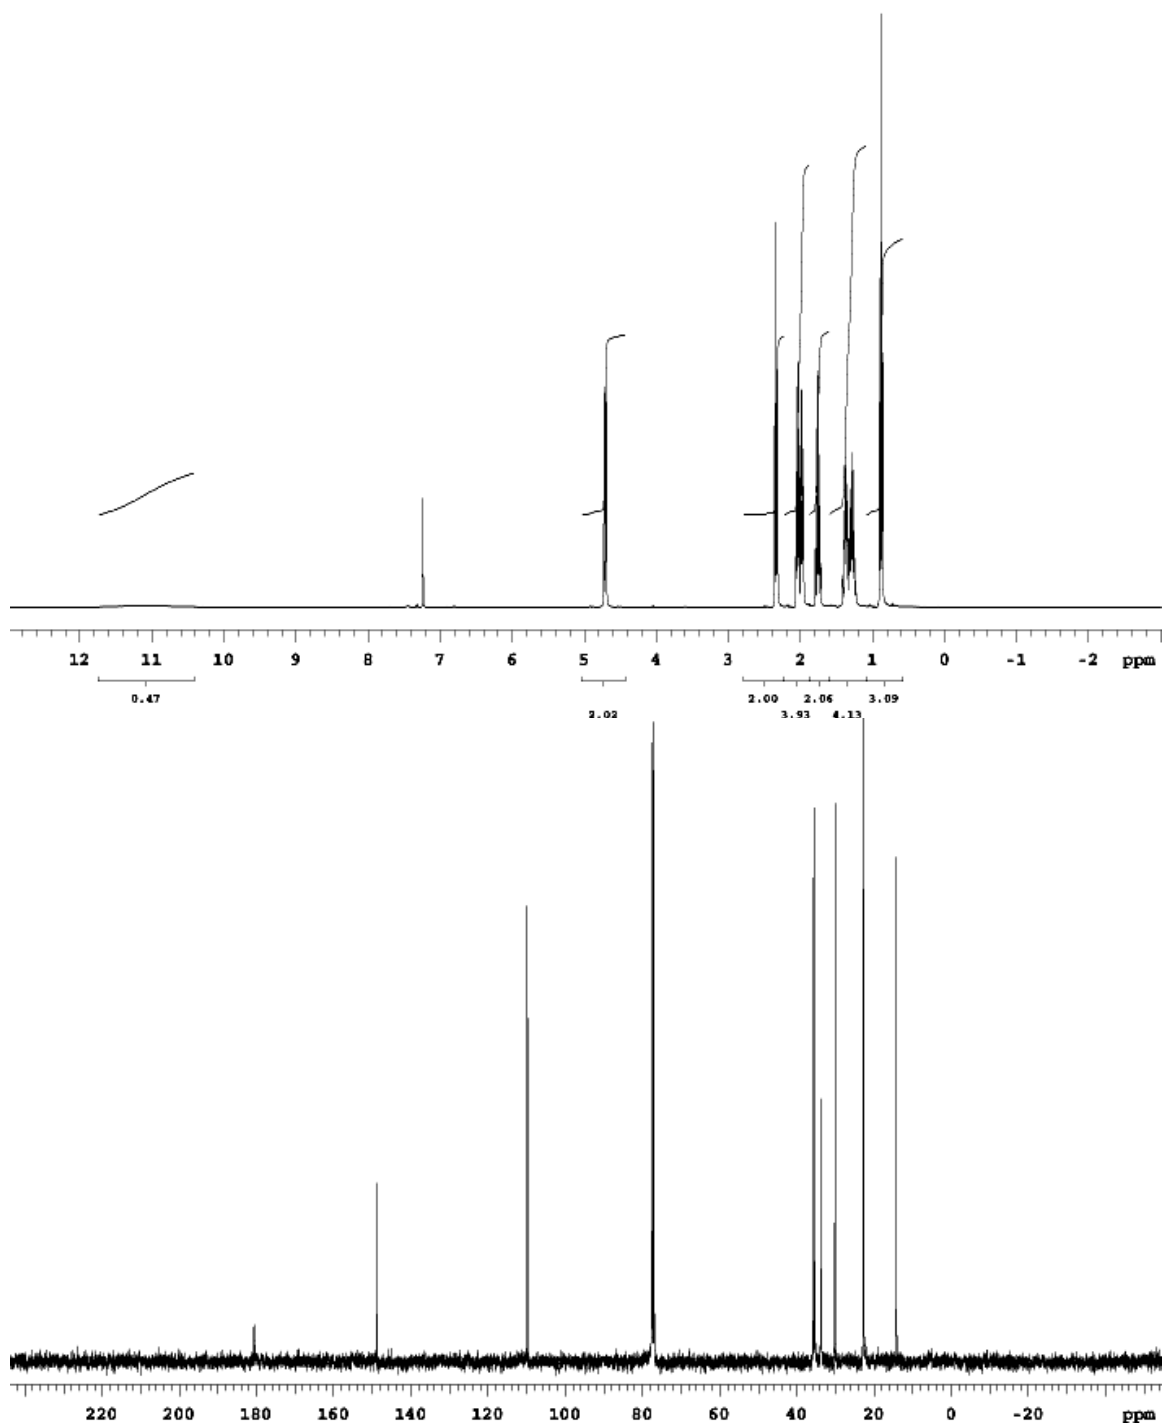

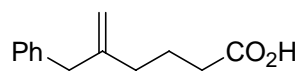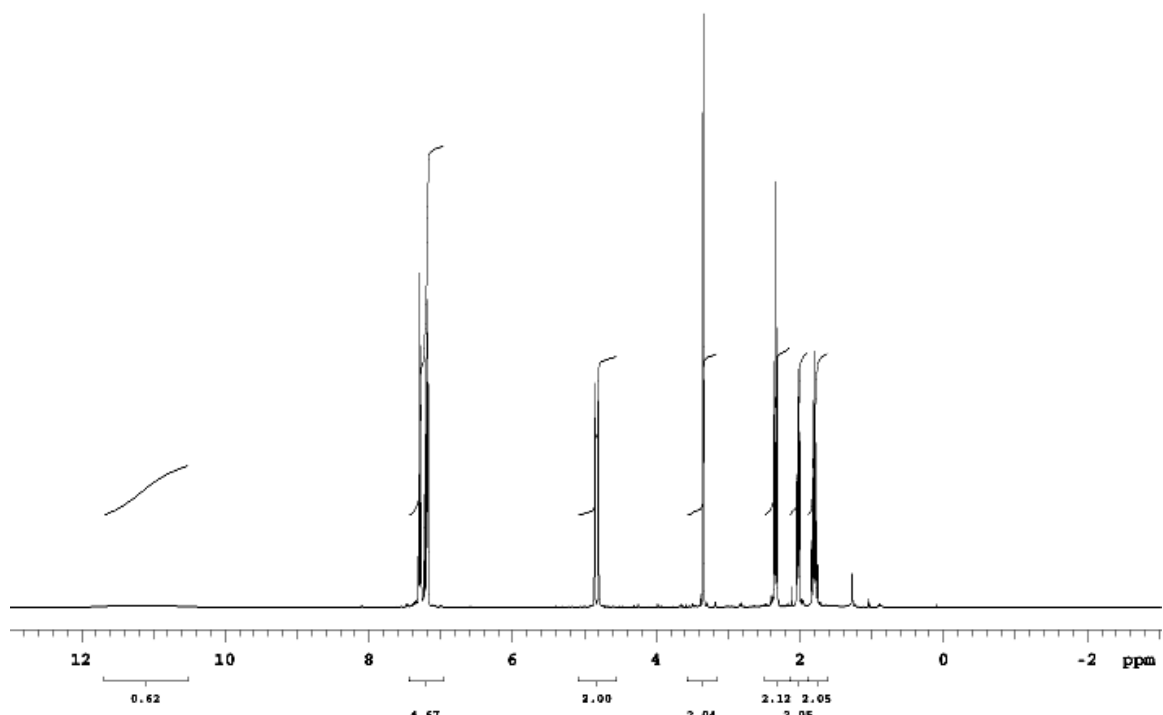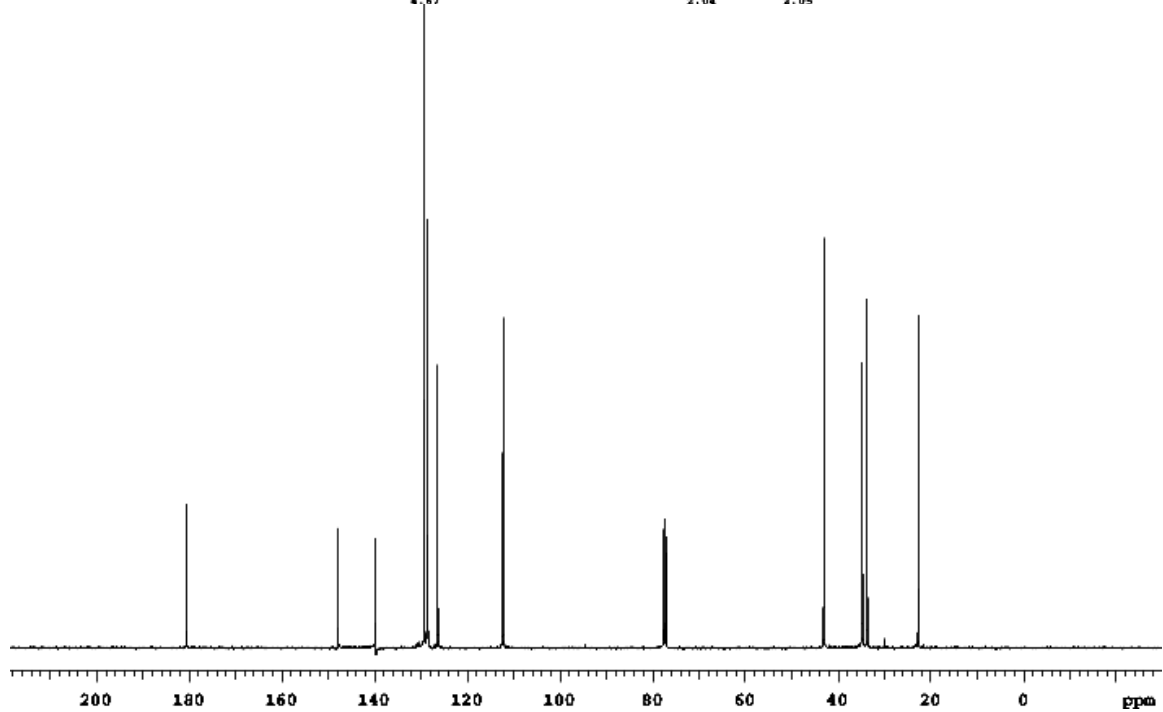



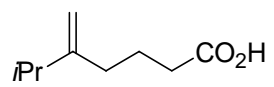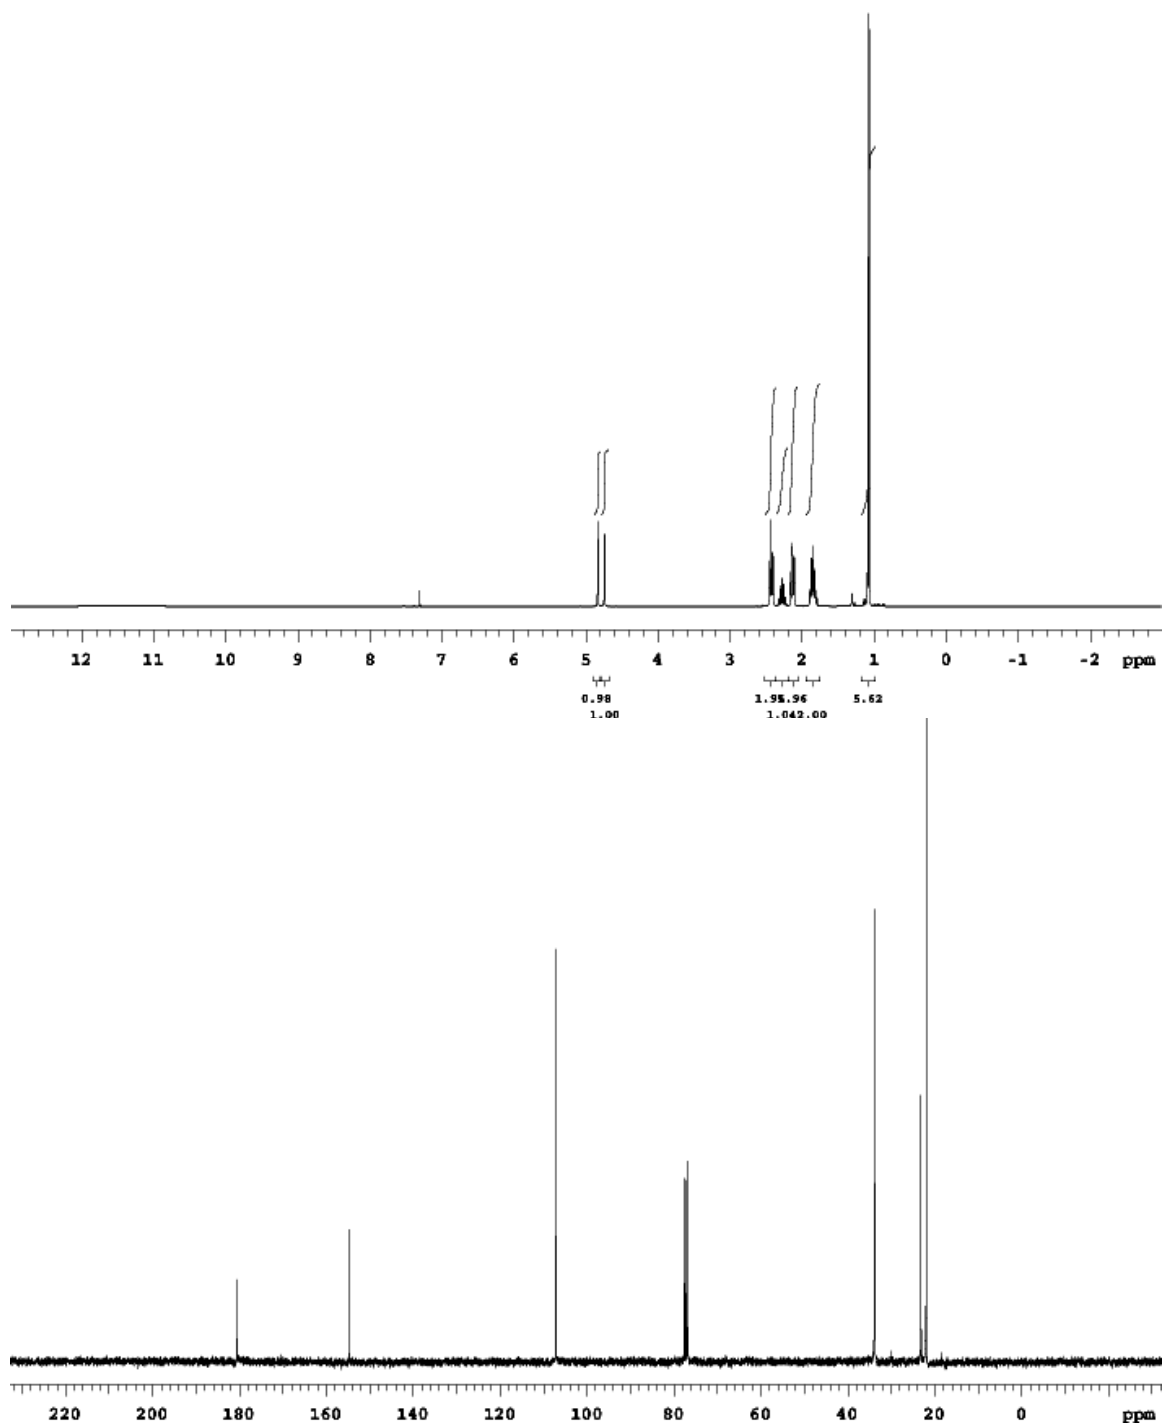

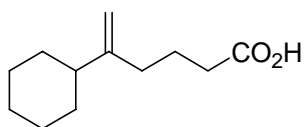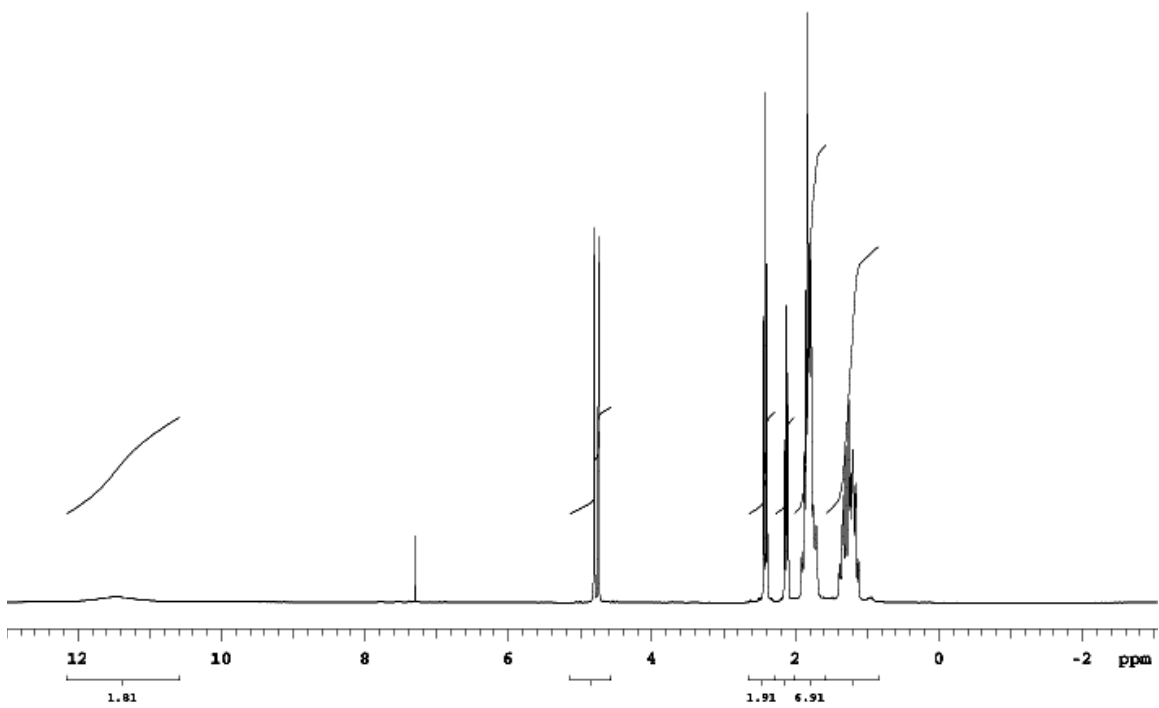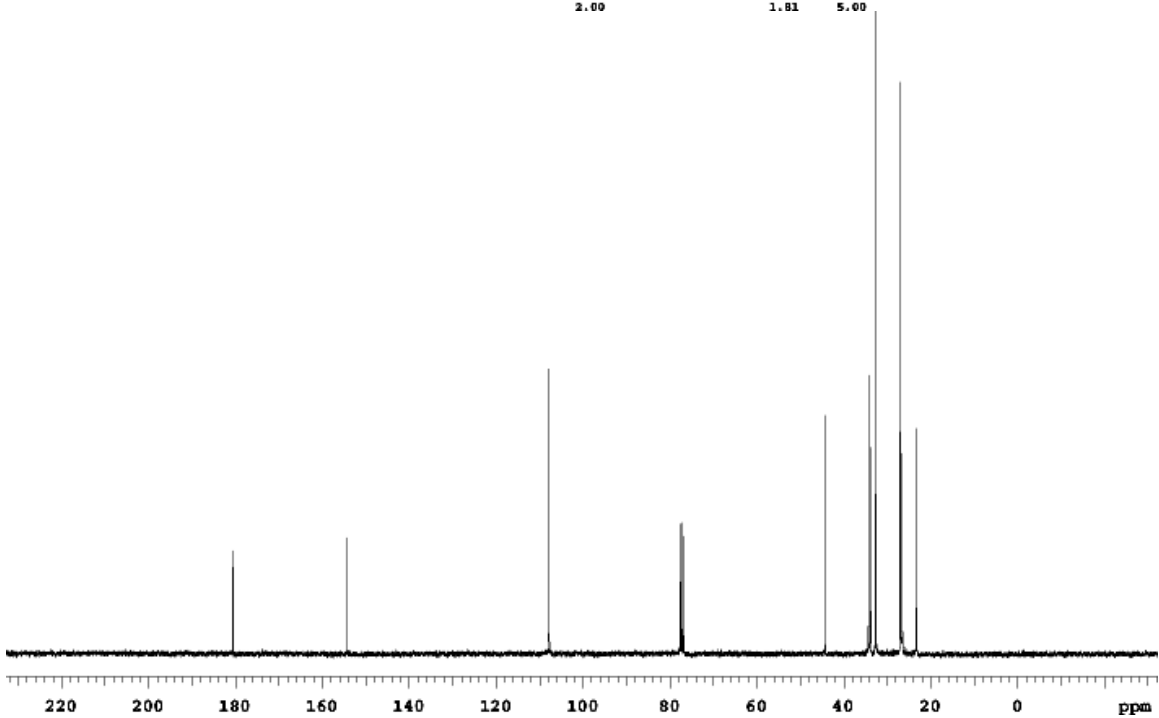

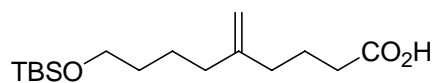

STANDARD 1H OBSERVE

e1\_1\_143

Solvent: CDCl3

Ambient temperature

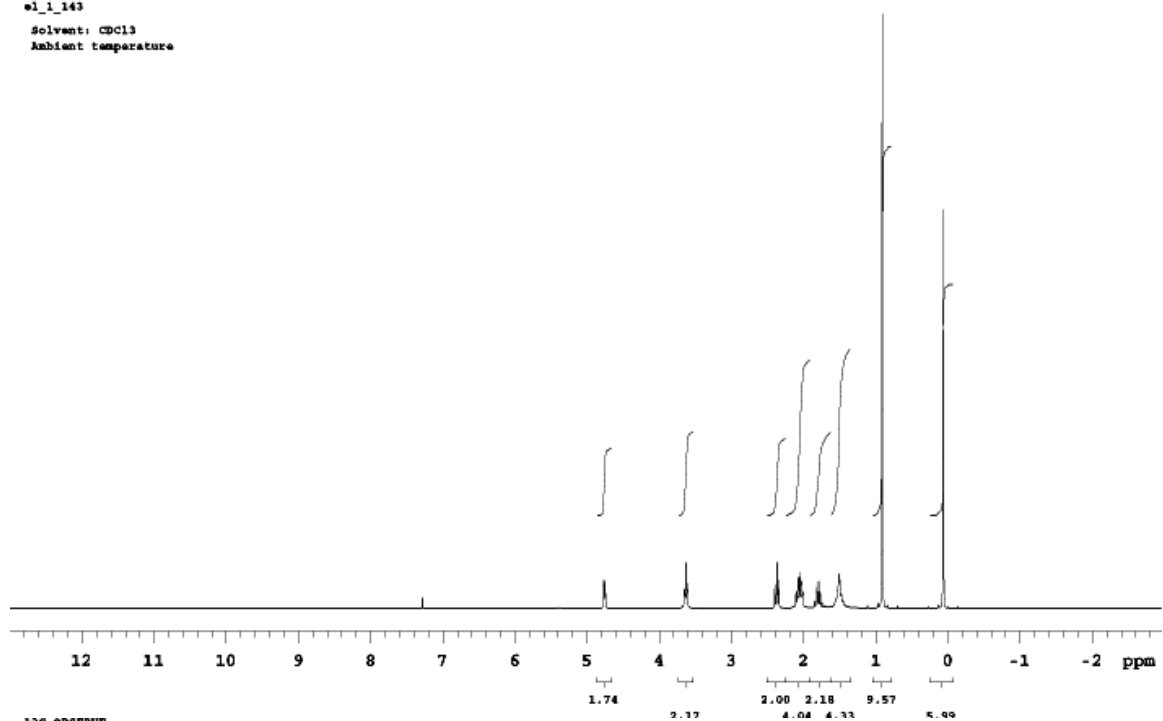

13C OBSERVE

Solvent: CDCl3

Ambient temperature

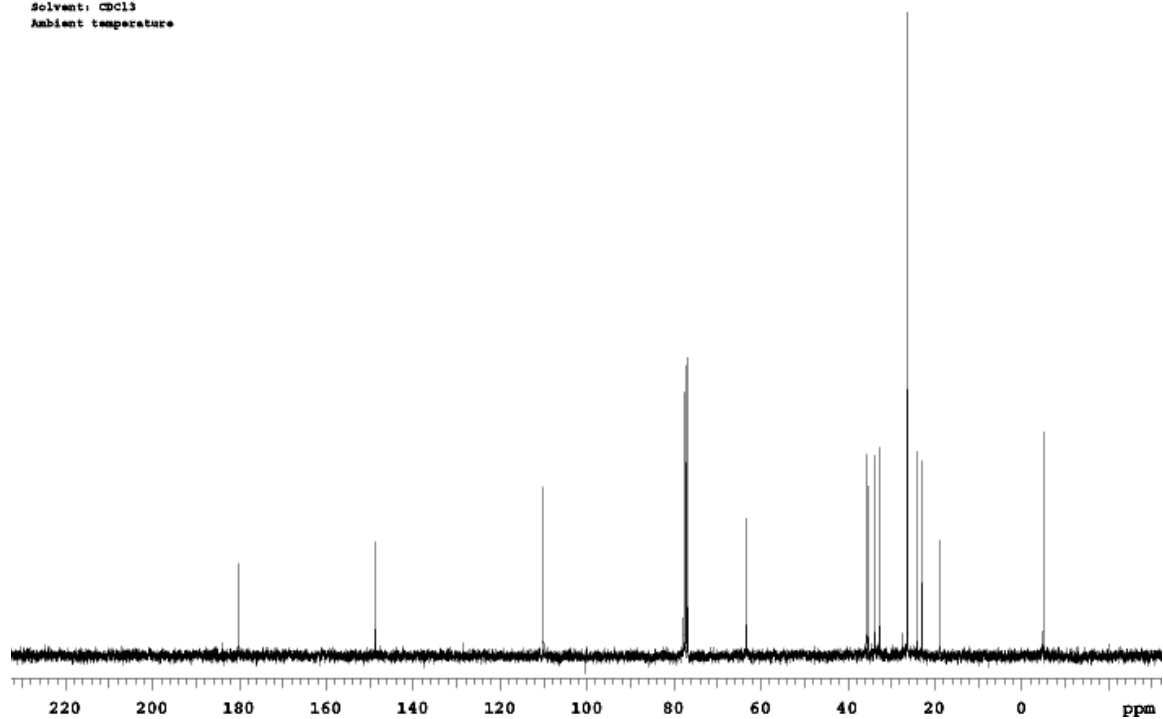

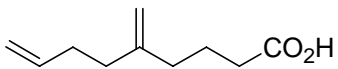

STANDARD 1H OBSERVE

el\_i\_195

Solvent: CDCl3

Ambient temperature

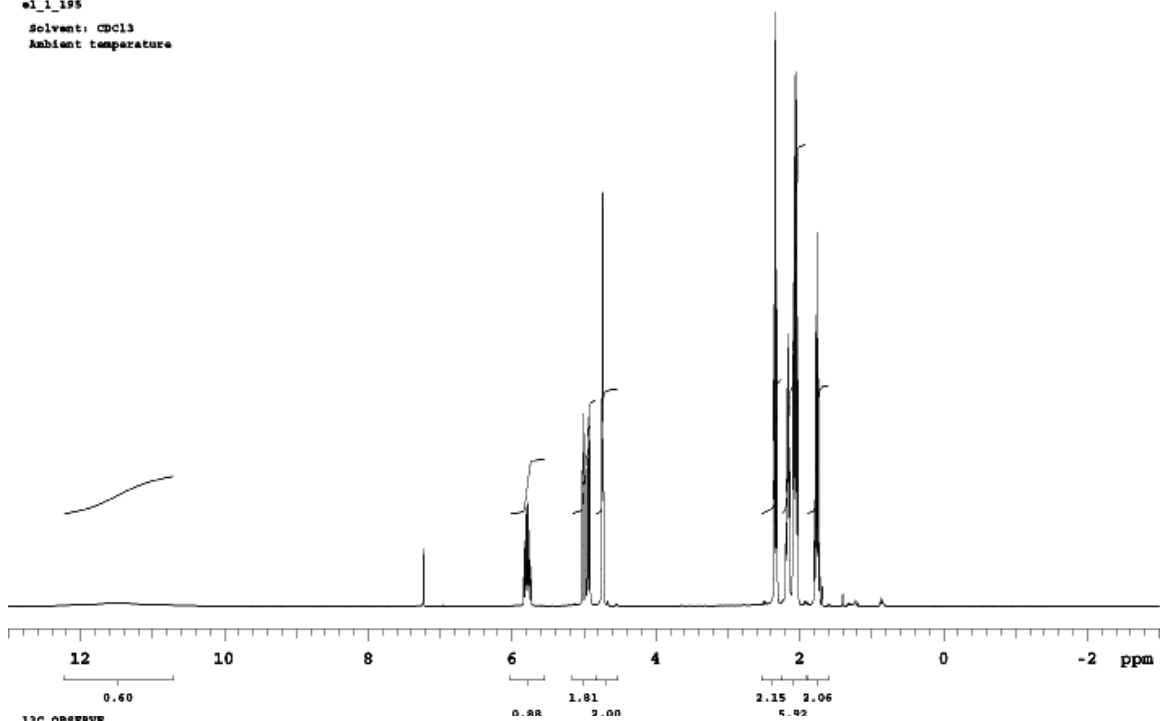

13C OBSERVE

el\_i\_195

Solvent: CDCl3

Ambient temperature

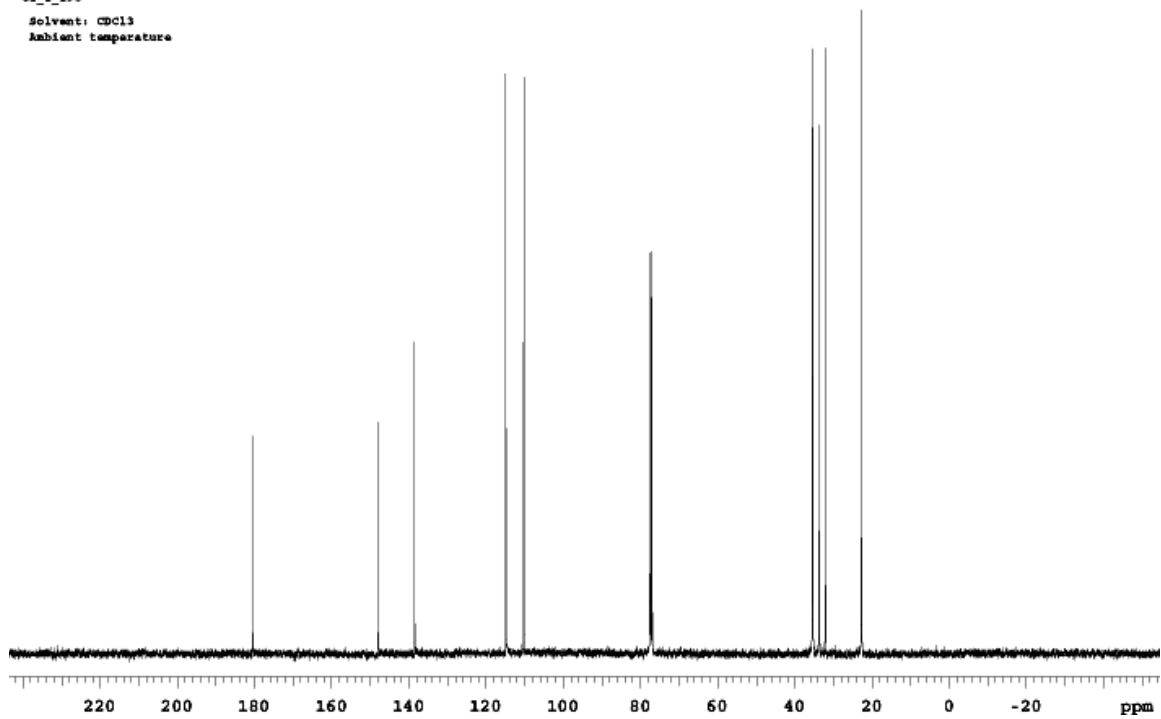

#### I.4 General procedure for isocyanate synthesis.

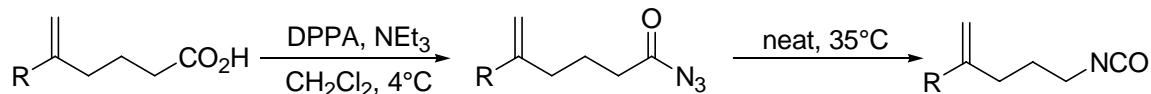

In a flame dried flask under Ar atmosphere, diphenylphosphoryl azide (8.88 mmol, 1.2 eq) was added to a stirring solution of carboxylic acid (7.4 mmol) in dichloromethane (25 mL) at 4 °C. Triethylamine (8.88 mmol, 1.2 eq) was then slowly added. After 4 hours, the reaction was concentrated under vacuum and rapidly purified by flash chromatography (solvent removal was carried out with the rotovap bath temperature less than 23 °C). The resulting acyl azide was then gently heated to 35°C for 16-24 hours to afford the desired isocyanate.

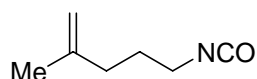

**5-Isocyanato-2-methyl-pent-1-ene (5a):** Flash chromatography of the acyl azide (Hex:EtOAc;98:2) and subsequent thermal conversion yielded a clear liquid (78%). IR (Thin Film)  $\nu$  2941, 2275, 1651, 1447, 1355, 891  $\text{cm}^{-1}$ ;  $^1\text{H}$  NMR (400 MHz,  $\text{CDCl}_3$ )  $\delta$  4.76 (1H, s), 4.71 (1H, s), 3.31 (2H, t,  $J = 6.5$  Hz), 2.11 (2H, t,  $J = 7.5$  Hz), 1.75 (2H, tt,  $J = 7.0, 7.0$  Hz), 1.73 (3H, s);  $^{13}\text{C}$  NMR (100 MHz,  $\text{CDCl}_3$ )  $\delta$  144.2, 111.2, 42.6, 34.7, 29.2, 22.4.

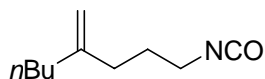

**1-Isocyanato-4-methylene-octane (5b):** Flash chromatography of the acyl azide (Hex:EtOAc;98:2) and subsequent thermal conversion yielded a clear liquid (70%). IR (Thin Film)  $\nu$  2929, 2170, 1644, 1489, 1270, 1183, 966  $\text{cm}^{-1}$ ;  $^1\text{H}$  NMR (400 MHz,  $\text{CDCl}_3$ )  $\delta$  4.74 (1H, s), 4.70 (1H, s), 3.28 (2H, t,  $J = 6.5$  Hz), 2.08 (2H, t,  $J = 8.0$  Hz), 1.98 (2H, t,  $J = 7.5$  Hz), 1.72 (2H, tt,  $J = 7.5, 7.0$  Hz), 1.43-1.24 (4H, m), 0.88 (3H, t,  $J = 8.0$  Hz);  $^{13}\text{C}$  NMR (100 MHz,  $\text{CDCl}_3$ )  $\delta$  148.3, -653904.0, 42.7, 35.8, 32.9, 30.1, 29.4, 22.6, 14.2.

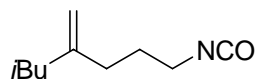

**1-Isocyanato-6-methyl-4-methylene-heptane (5c):** Flash chromatography of the acyl azide (Hex:EtOAc;98:2) and subsequent thermal conversion yielded a clear liquid (54%). IR (Thin Film)  $\nu$  2955, 2870, 2277, 1644, 1465, 1367  $\text{cm}^{-1}$ ;  $^1\text{H}$  NMR (400 MHz,  $\text{CDCl}_3$ )  $\delta$  4.73 (1H, s), 4.71 (1H, s), 3.27 (2H, td,  $J = 6.5, 0.5$  Hz), 2.04 (2H, t,  $J = 7.0$  Hz), 1.85 (2H, d,  $J = 7.0$  Hz), 1.75-1.66 (3H, m), 0.84 (2H, d,  $J = 6.5$  Hz);  $^{13}\text{C}$  NMR (100 MHz,  $\text{CDCl}_3$ )  $\delta$  147.0, 111.4, 45.9, 42.7, 32.6, 29.3, 26.2, 22.6.

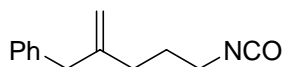

**(5-Isocyanato-2-methylene-pentyl)-benzene (5d):** Flash chromatography of the acyl azide (Hex:EtOAc;98:2) and subsequent thermal conversion yielded a clear liquid (75%). IR (Thin Film)  $\nu$  2948, 2277, 1645, 1494, 1452, 897  $\text{cm}^{-1}$ ;  $^1\text{H}$  NMR (400 MHz,  $\text{CDCl}_3$ )  $\delta$  7.30-7.15 (5H, m), 4.84 (1H, s), 4.81 (1H, s), 3.33 (2H, s), 3.26 (2H, t,  $J = 6.5$  Hz), 2.04 (2H, t,  $J = 7.5$  Hz), 1.72 (2H, tt,  $J = 7.0$  Hz);  $^{13}\text{C}$  NMR (100 MHz,  $\text{CDCl}_3$ )  $\delta$  147.4, 139.5, 129.1, 128.6, 126.5, 112.4, 43.2, 42.6, 32.3, 29.2.

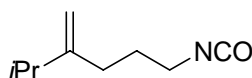

**1-Isocyanato-5-methyl-4-methylene-hexane (5e):** Flash chromatography of the acyl azide (Hex:EtOAc;98:2) and subsequent thermal conversion yielded a clear liquid (80%). IR (Thin Film)  $\nu$  2930, 2852, 2270, 1641, 1448, 1355, 888  $\text{cm}^{-1}$ ;  $^1\text{H}$  NMR (400 MHz,  $\text{CDCl}_3$ )  $\delta$  4.78 (1H, s), 4.66 (1H, s), 3.30 (2H, t,  $J = 6.5$  Hz), 2.20 (1H, sept,  $J = 7.0$  Hz), 2.09 (2H, t,  $J = 8.0$  Hz), 1.74 (2H, tt,  $J = 7.0, 7.0$  Hz), 1.00 (6H, d,  $J = 7.0$  Hz);  $^{13}\text{C}$  NMR (100 MHz,  $\text{CDCl}_3$ )  $\delta$  154.4, 107.5, 42.8, 33.9, 31.3, 29.7, 22.0.

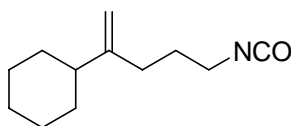

**(4-Isocyanato-1-methylene-butyl)-cyclohexane (5f):** Flash chromatography of the acyl azide (Hex:EtOAc;98:2) and subsequent thermal conversion yielded a clear liquid (77%). IR (Thin Film)  $\nu$  2926, 2852, 2276, 1641, 1448, 1355, 888  $\text{cm}^{-1}$ ;  $^1\text{H}$  NMR (400 MHz,  $\text{CDCl}_3$ )  $\delta$  4.74 (1H, s), 4.67 (1H, s), 3.28 (2H, t,  $J = 7.5$  Hz), 2.08 (2H, t,  $J = 7.5$  Hz), 1.84-1.62 (8H, m), 1.30-1.06 (5H, m);  $^{13}\text{C}$  NMR (100 MHz,  $\text{CDCl}_3$ )  $\delta$  153.7, 108.0, 44.2, 42.8, 32.6, 31.8, 29.8, 27.0, 26.5.

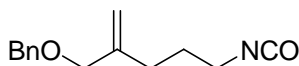

**(5-Isocyanato-2-methylene-pentyloxymethyl)-benzene (5g):** Flash chromatography of the acyl azide (Hex:EtOAc;98:2) and subsequent thermal conversion yielded a clear liquid (61%). IR (Thin Film)  $\nu$  2933, 2856, 2277, 1650, 1453, 1096, 1072, 906  $\text{cm}^{-1}$ ;  $^1\text{H}$  NMR (400 MHz,  $\text{CDCl}_3$ )  $\delta$  7.35-7.24 (m, 5), 5.09 (1H, s), 4.95 (1H, s), 4.48 (2H, s), 3.95 (2H, s), 3.31 (2H, t,  $J = 6.5$  Hz), 2.18 (2H, t,  $J = 7.0$  Hz), 1.76 (2H, tt,  $J = 7.0, 7.0$  Hz);  $^{13}\text{C}$  NMR (100 MHz,  $\text{CDCl}_3$ )  $\delta$  144.6, 138.4, 128.6, 127.9, 127.9, 113.1, 73.1, 72.2, 42.7, 30.2, 29.2.

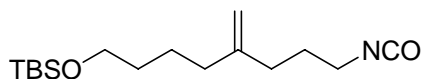

**tert-Butyl-(8-isocyanato-5-methylene-octyloxy)-dimethyl-silane (5i):** Flash chromatography of the acyl azide (Hex:EtOAc;98:2) and subsequent thermal conversion yielded a clear liquid (59%). IR (Thin Film)  $\nu$  2931, 2858, 2277, 1472, 1256, 1103, 909, 734  $\text{cm}^{-1}$ ;  $^1\text{H}$  NMR (400 MHz,  $\text{CDCl}_3$ )  $\delta$  4.75 (1H, s), 4.72 (1H, s), 3.59 (2H, t,  $J = 6.5$  Hz), 3.28 (2H, t,  $J = 6.5$  Hz), 2.08 (2H, t,  $J = 7.5$  Hz), 2.00 (2H, t,  $J = 6.5$  Hz), 1.72 (2H, tt,  $J = 7.5, 7.0$  Hz), 1.51-1.43 (4H, m), 0.87 (9H, s), 0.02 (6H, s);  $^{13}\text{C}$  NMR (100 MHz,  $\text{CDCl}_3$ )  $\delta$  148.1, 110.2, 63.2, 42.7, 35.8, 32.9, 32.6, 29.3, 26.2, 24.1, 18.6, -5.1.

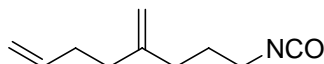

**8-Isocyanato-5-methylene-oct-1-ene (5i):** Flash chromatography of the acyl azide (Hex:EtOAc;98:2) and subsequent thermal conversion yielded a clear liquid (87%). IR (Thin Film)  $\nu$  2936, 2277, 1643, 1446, 1356, 911  $\text{cm}^{-1}$ ;  $^1\text{H}$  NMR (400 MHz,  $\text{CDCl}_3$ )  $\delta$  5.78 (1H, ddd,  $J = 17.0, 10.5, 6.5$  Hz), 4.99 (1H, dd,  $J = 17.0, 1.5$  Hz), 4.94 (1H, dd,  $J = 10.5, 1.5$  Hz), 4.77 (1H, s), 4.74 (1H, s), 3.29 (2H, td,  $J = 6.5, 1.0$  Hz), 2.17 (2H, tdd,  $J = 7.0, 7.0, 1.0$  Hz), 2.11-2.05 (4H, m), 1.72 (2H, tt,  $J = 7.0$  Hz);  $^{13}\text{C}$  NMR (100 MHz,  $\text{CDCl}_3$ )  $\delta$  147.4, 138.4, 122.2, 114.9, 110.4, 42.6, 35.3, 33.0, 32.1, 29.3.

### I.5 Isocyanate $^1\text{H}$ and $^{13}\text{C}$ NMR Spectra

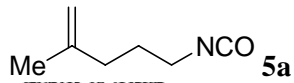

STANDARD 1H OBSERVE  
el\_1\_153

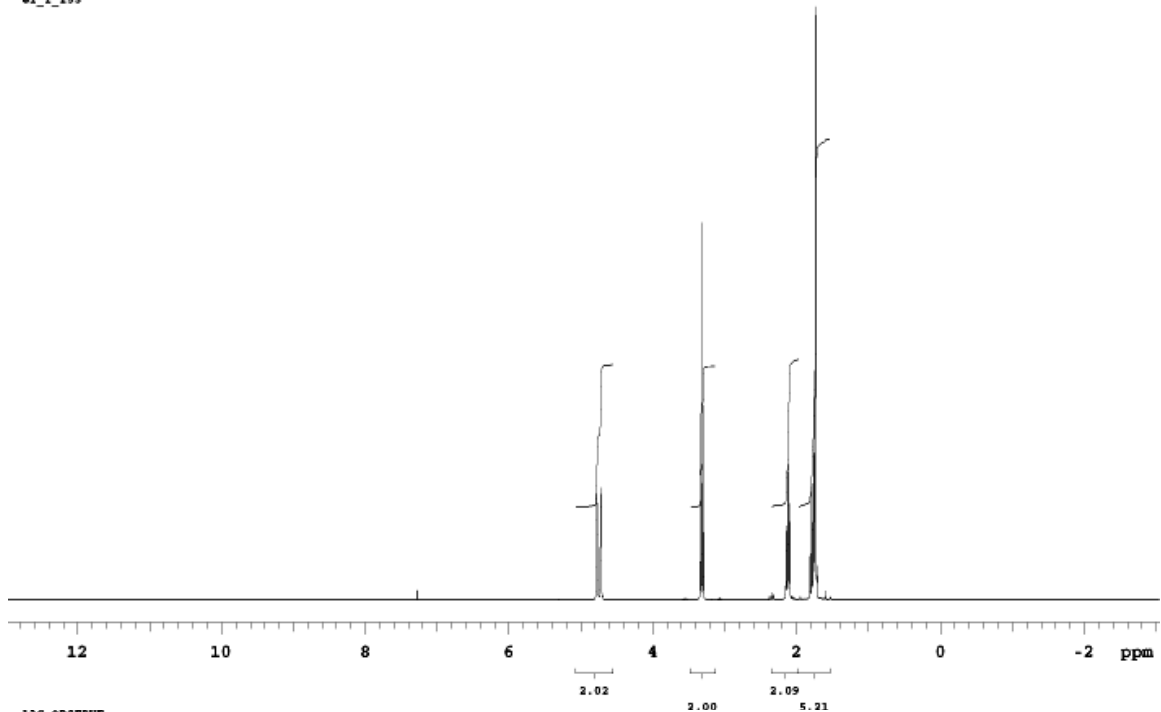

$^{13}\text{C}$  OBSERVE  
el\_1\_153\_13C  
Solvent:  $\text{CDCl}_3$   
Ambient temperature

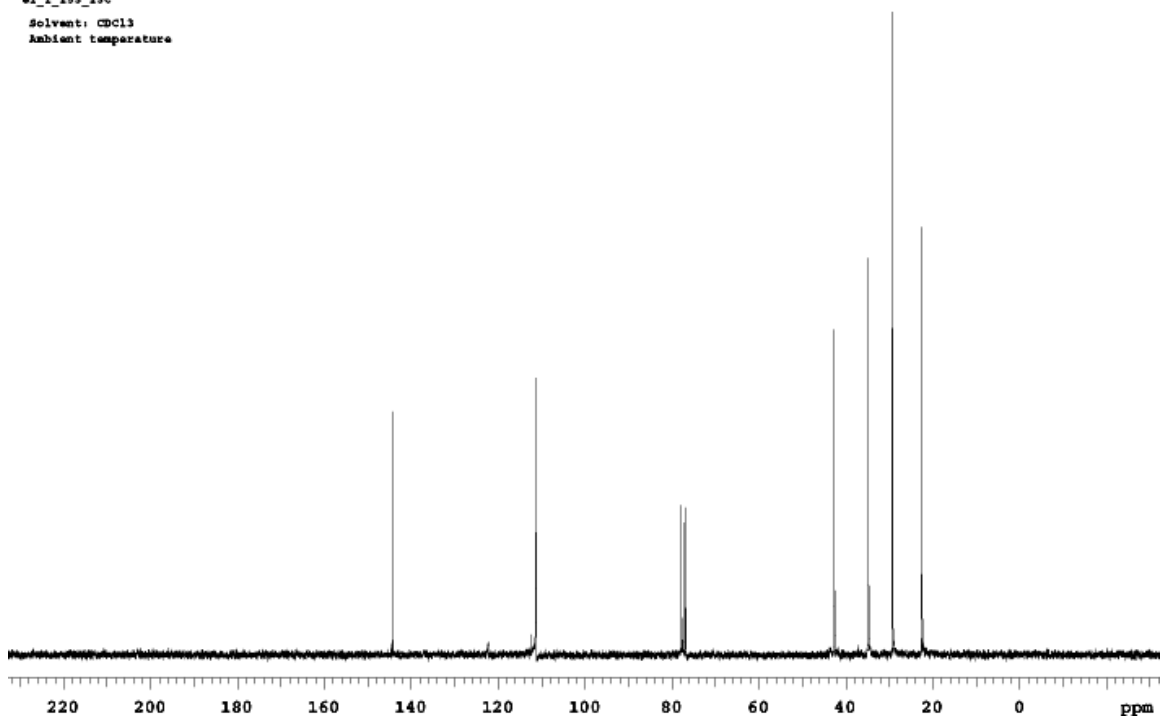



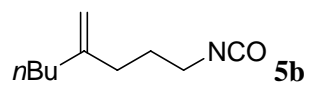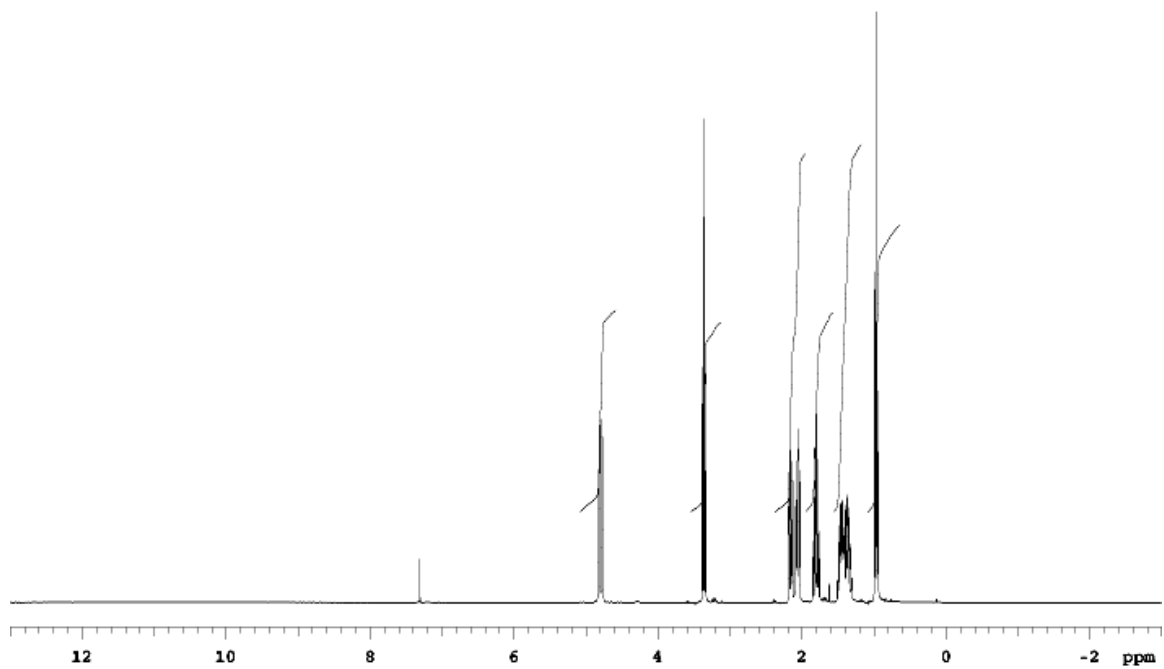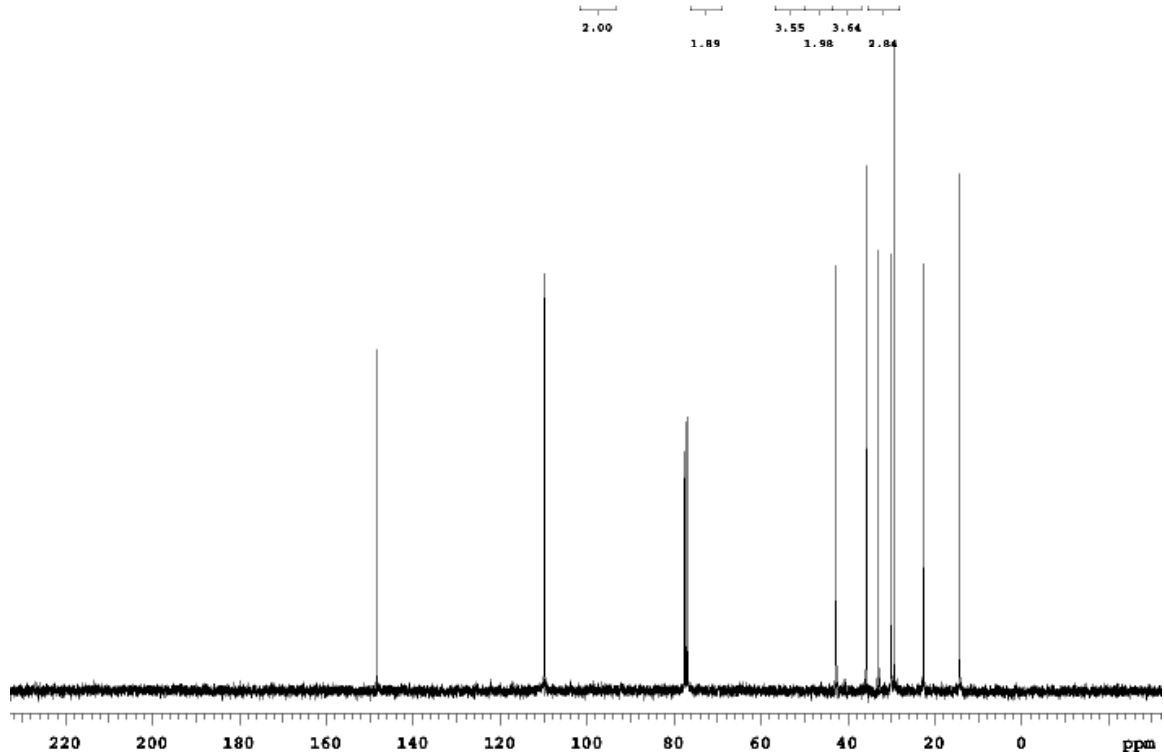

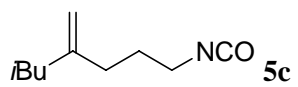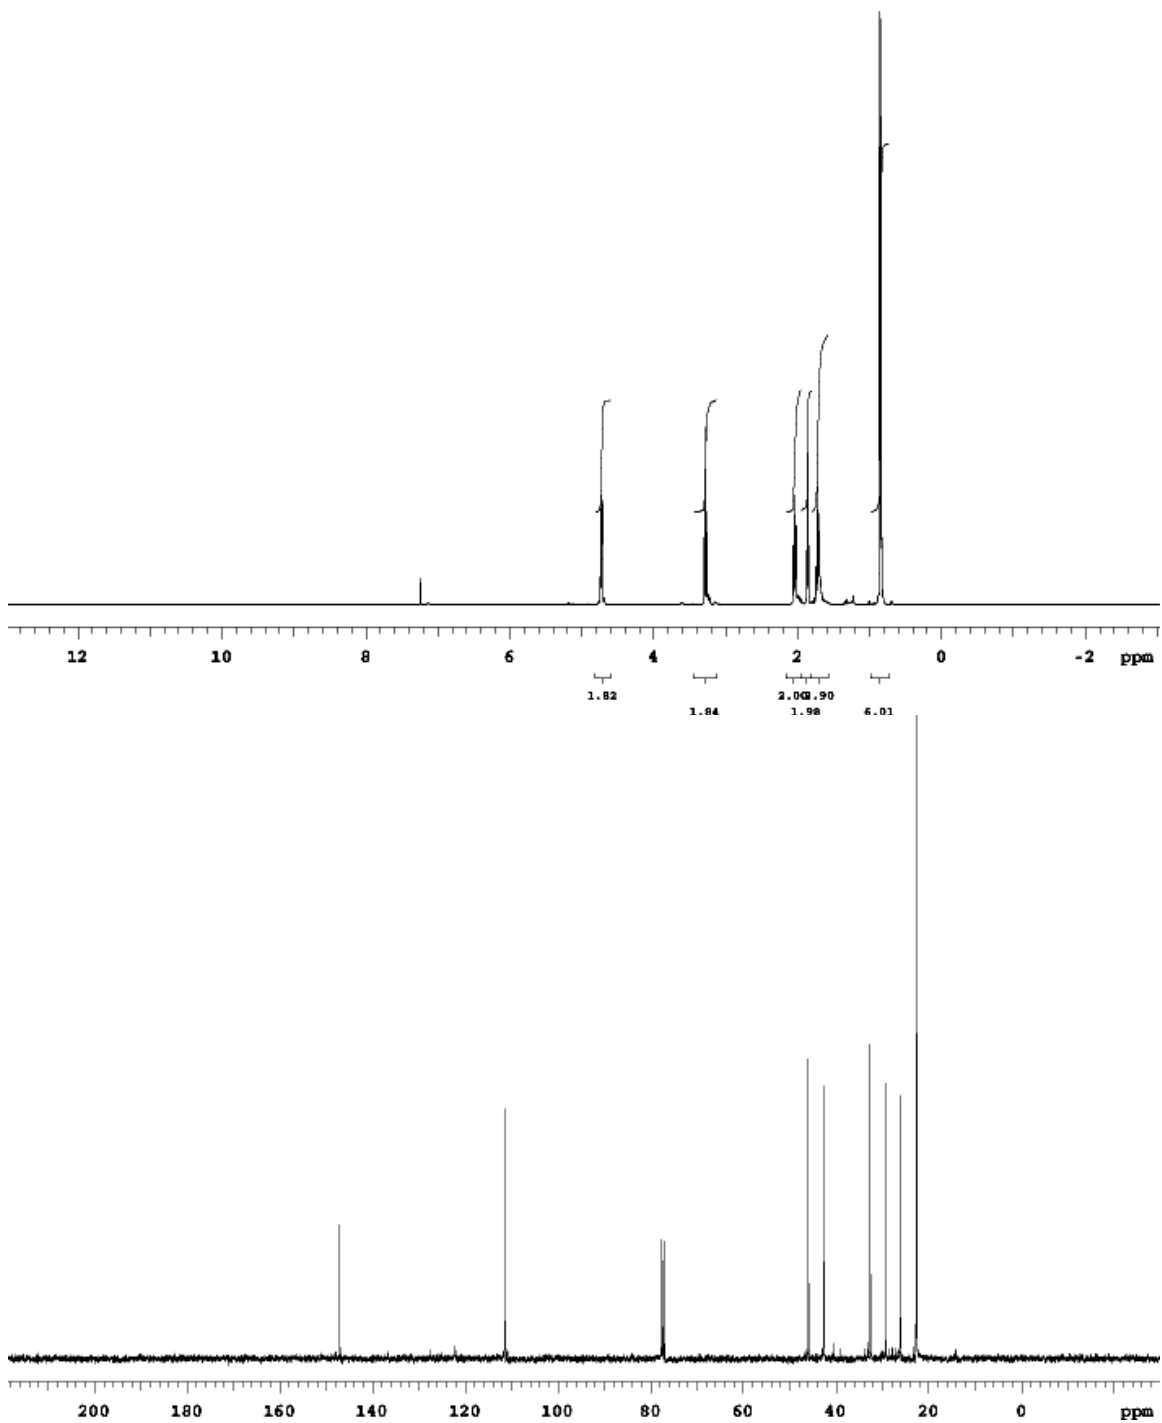

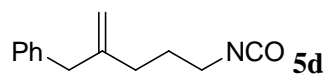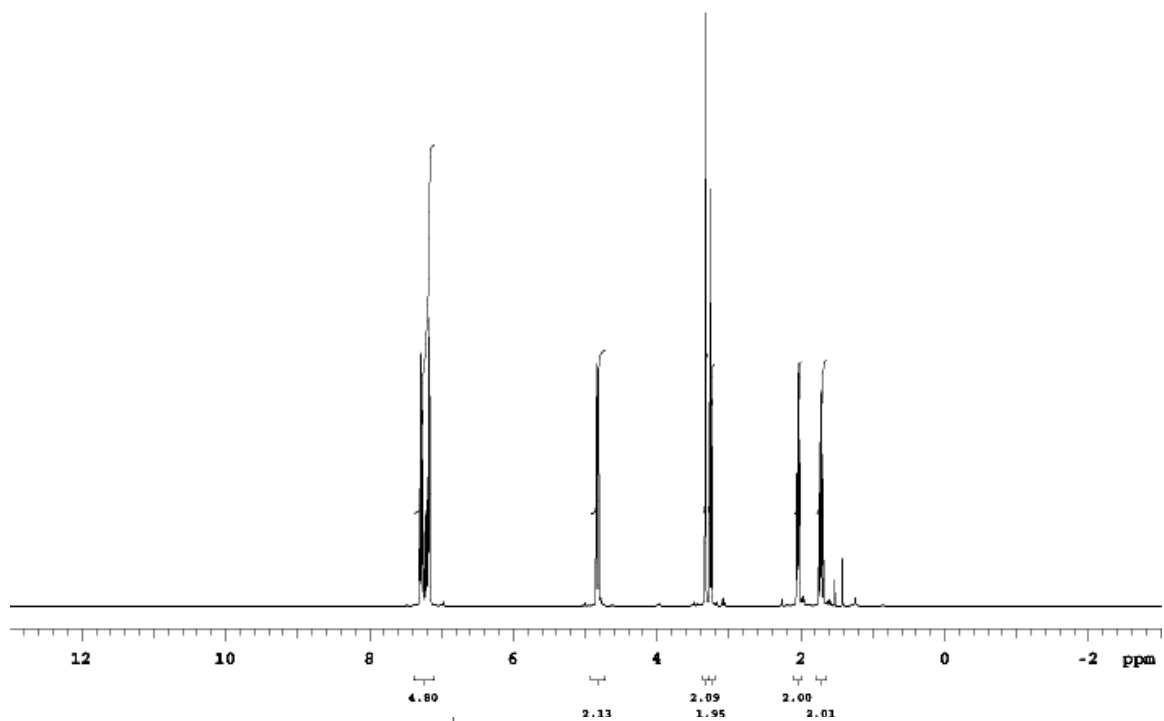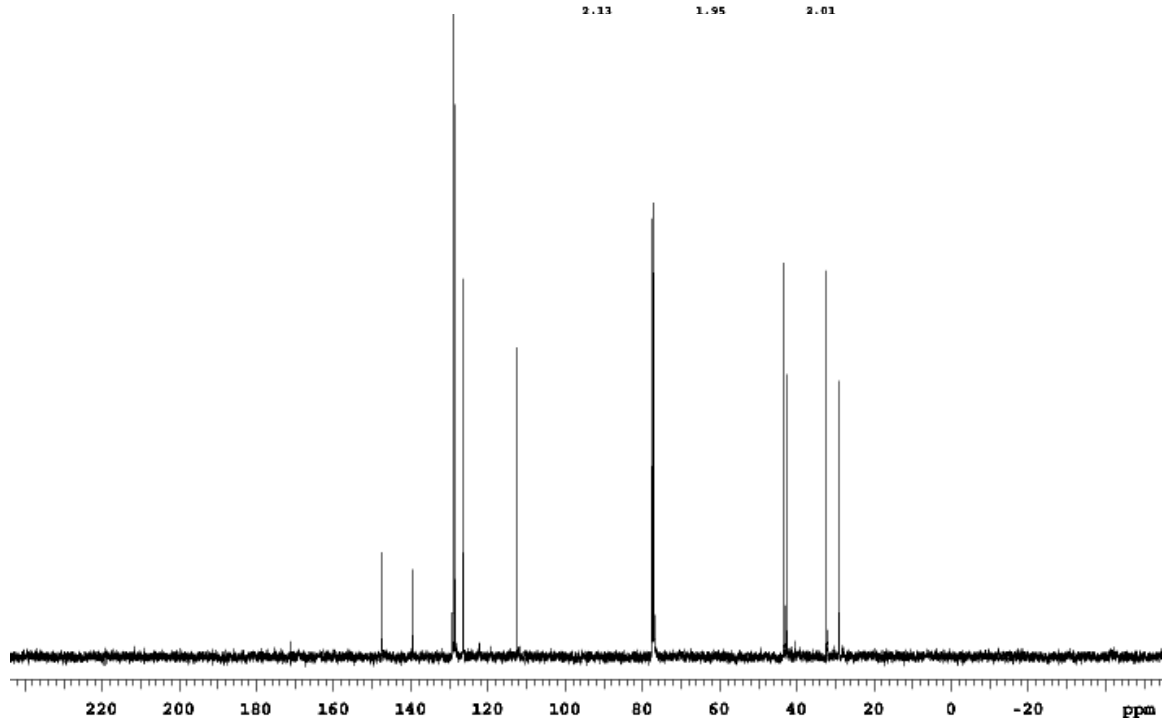

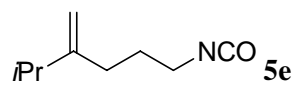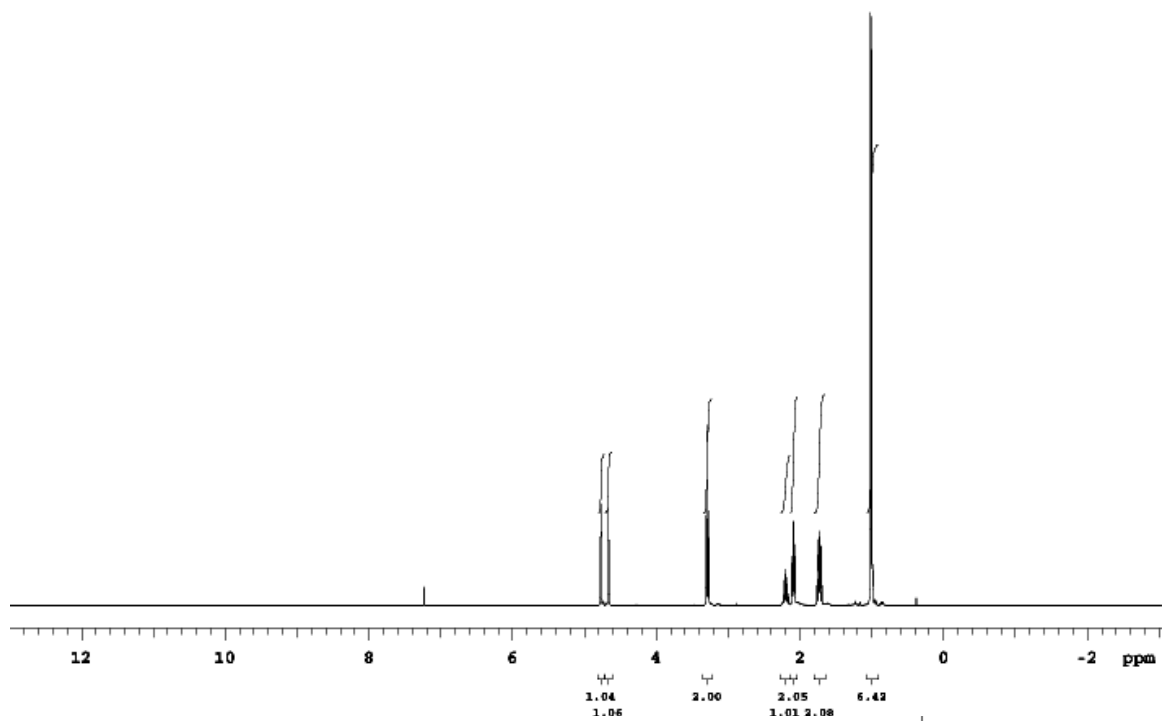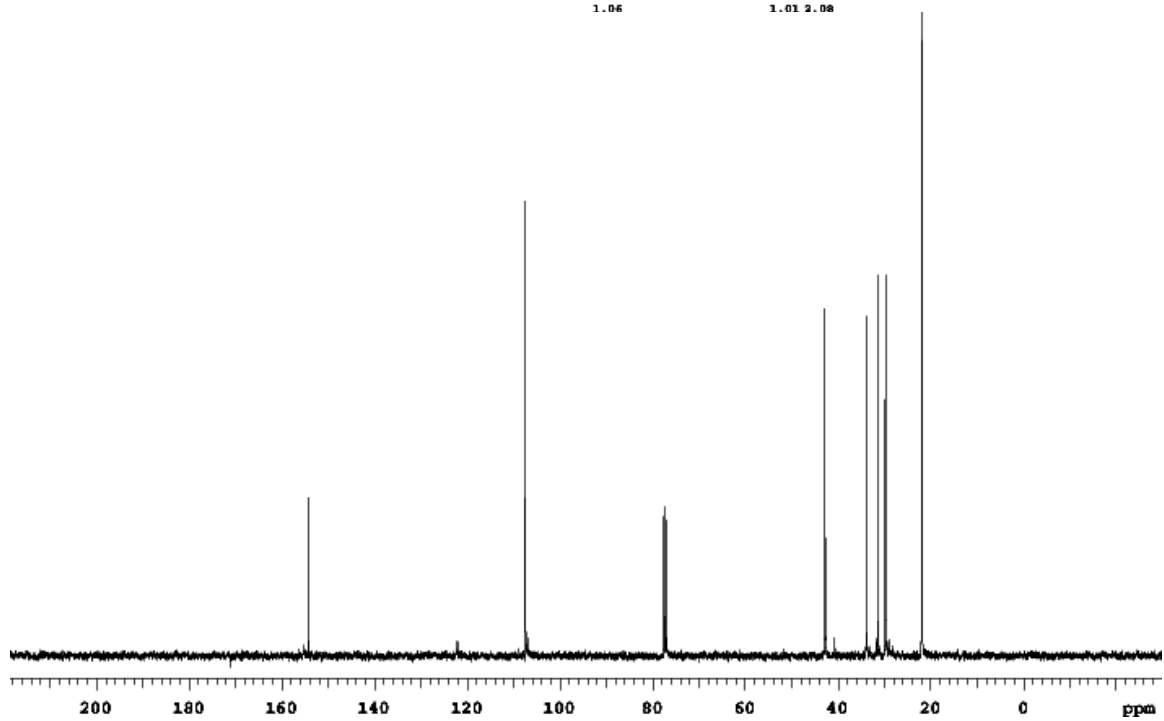

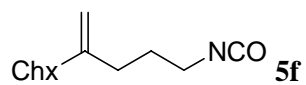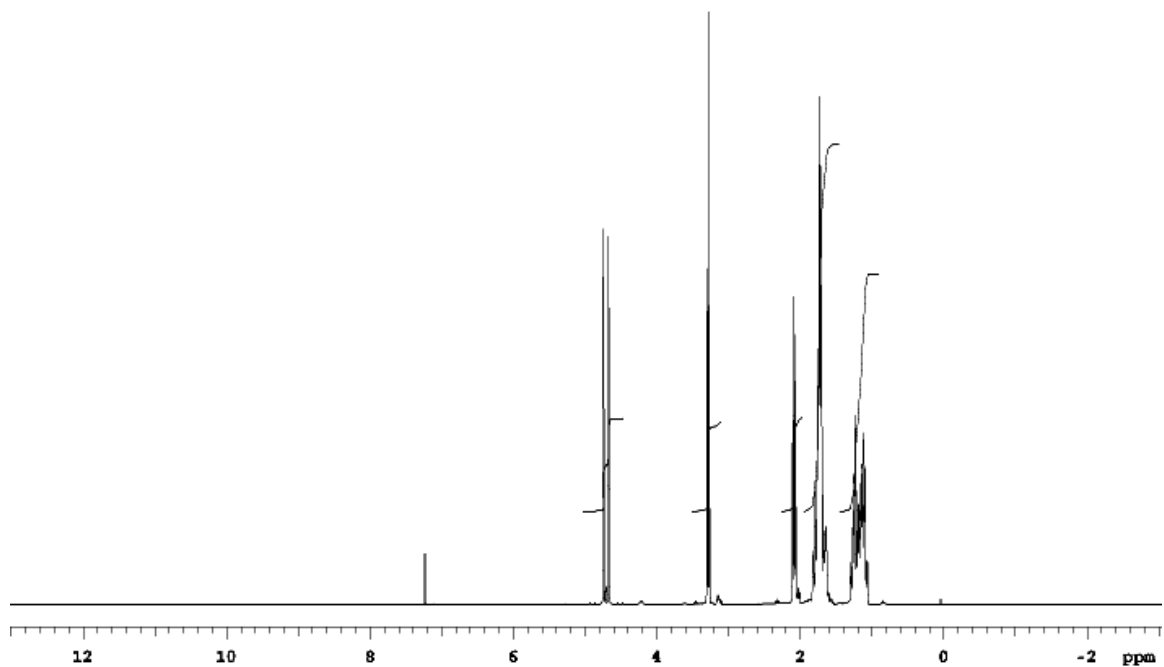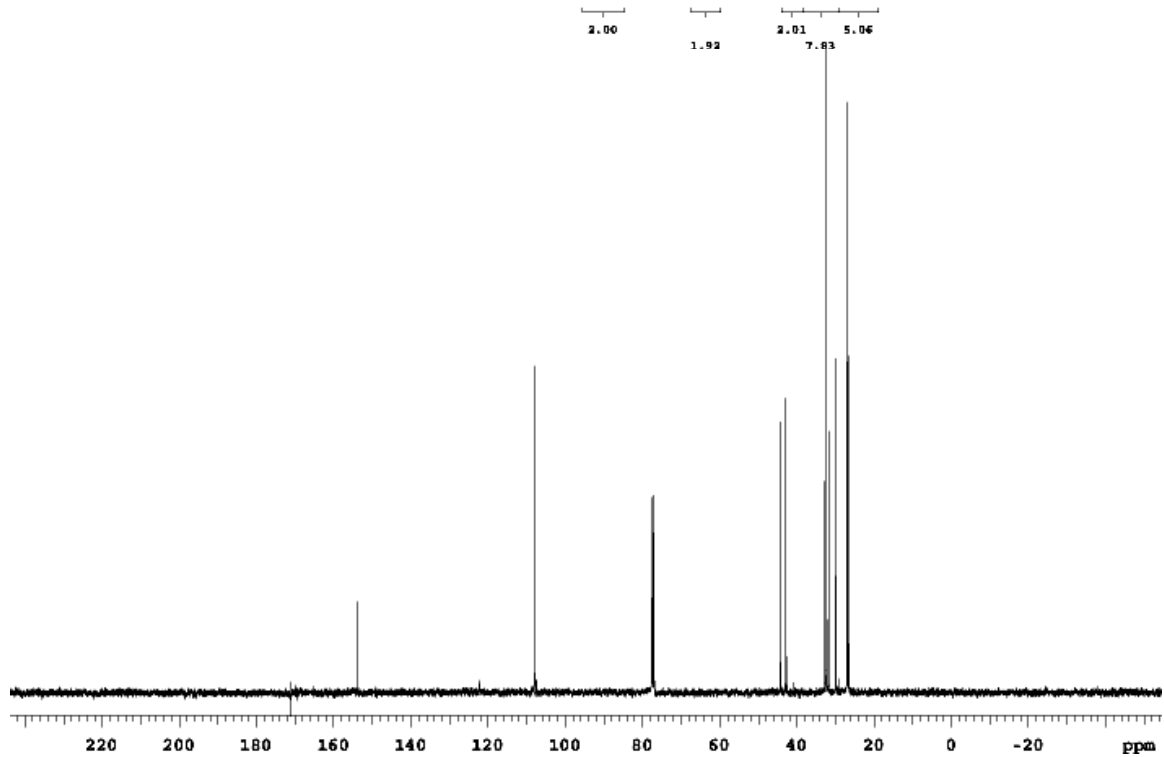

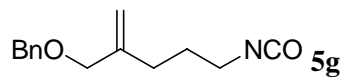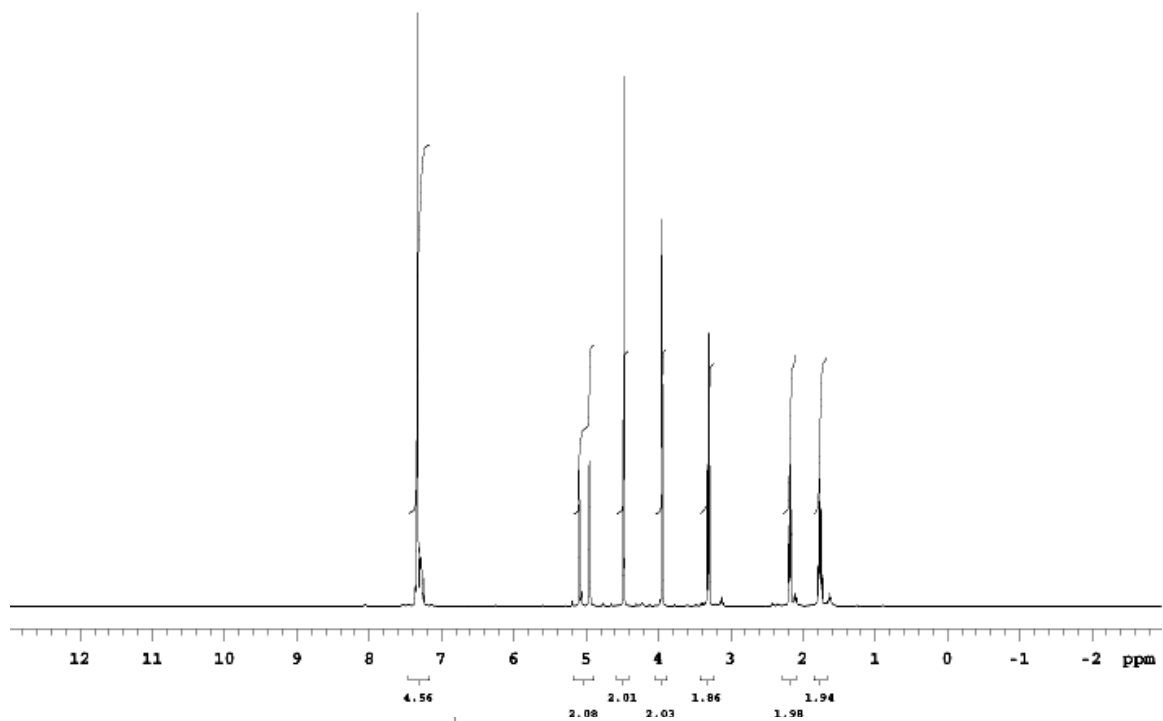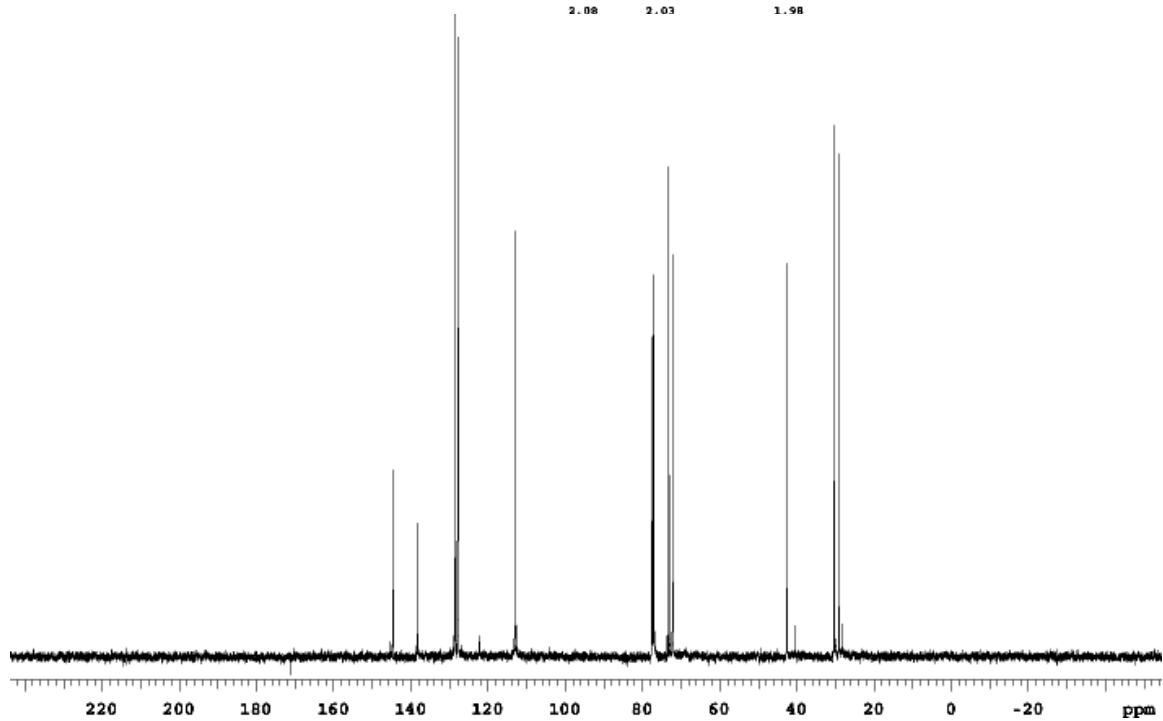

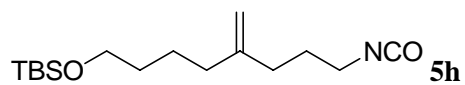

STANDARD 1B OBSERVE  
el\_1\_164  
Solvent: CDCl3  
Ambient temperature

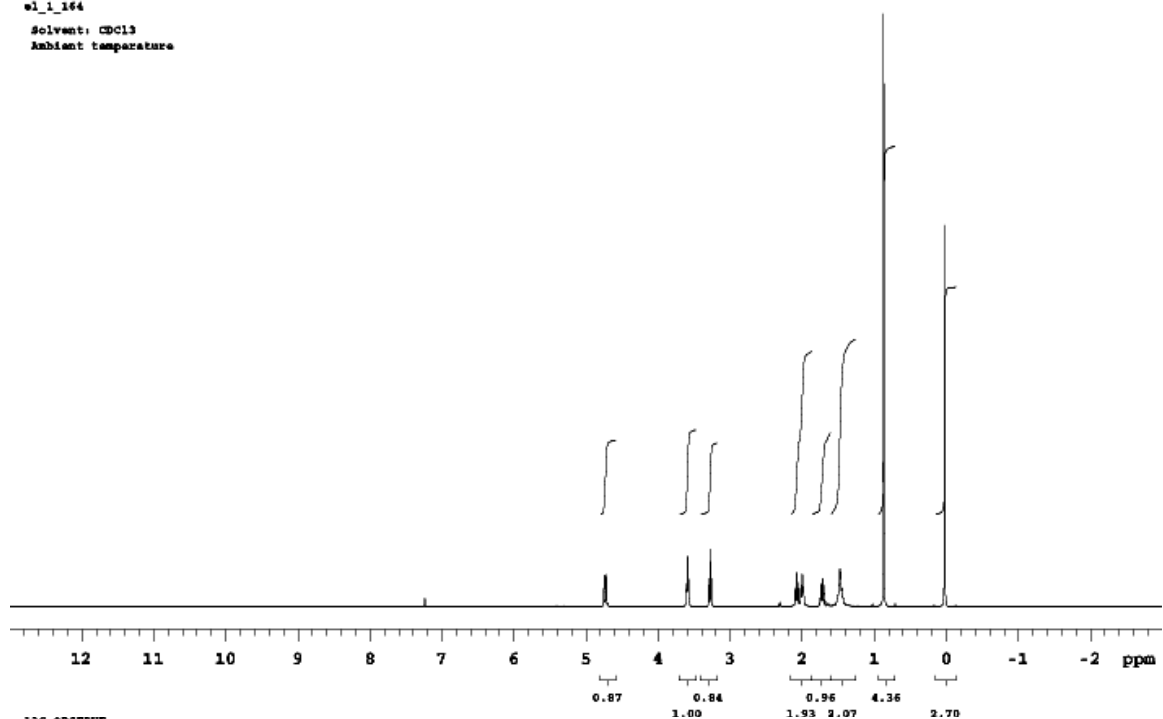

13C OBSERVE  
el\_1\_164\_1  
Solvent: CDCl3  
Ambient temperature

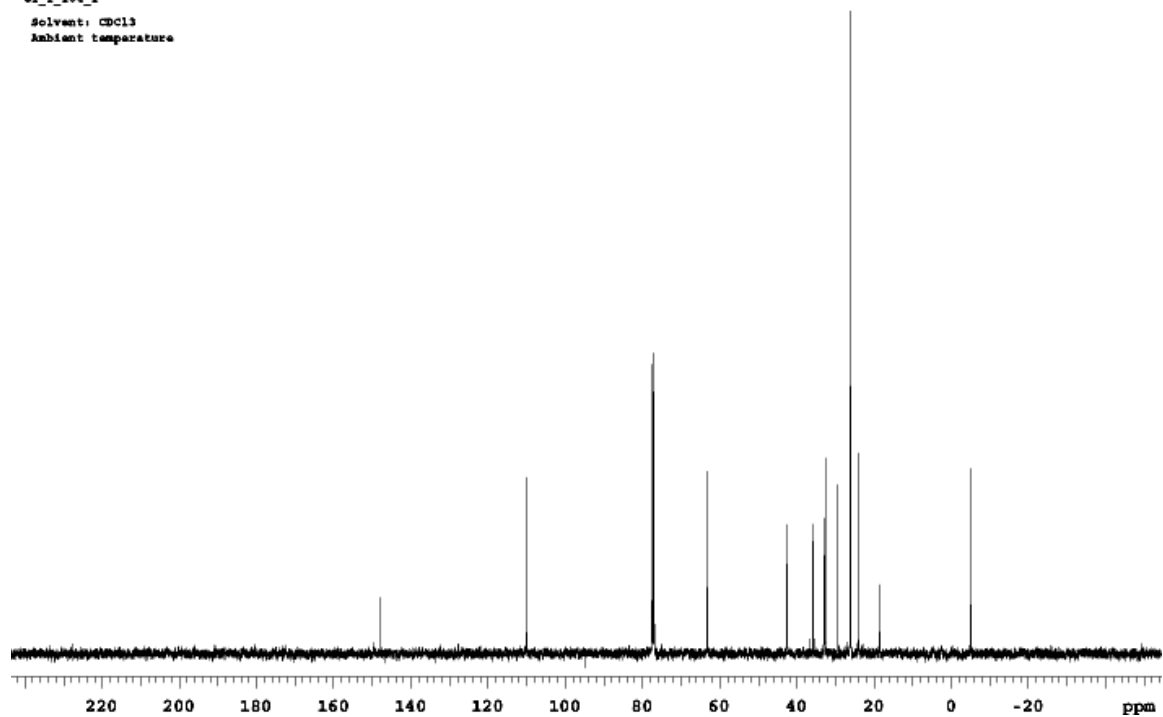

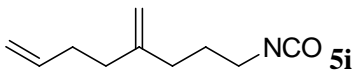

STANDARD 1H OBSERVE

Solvent: CDCl3  
Ambient temperature

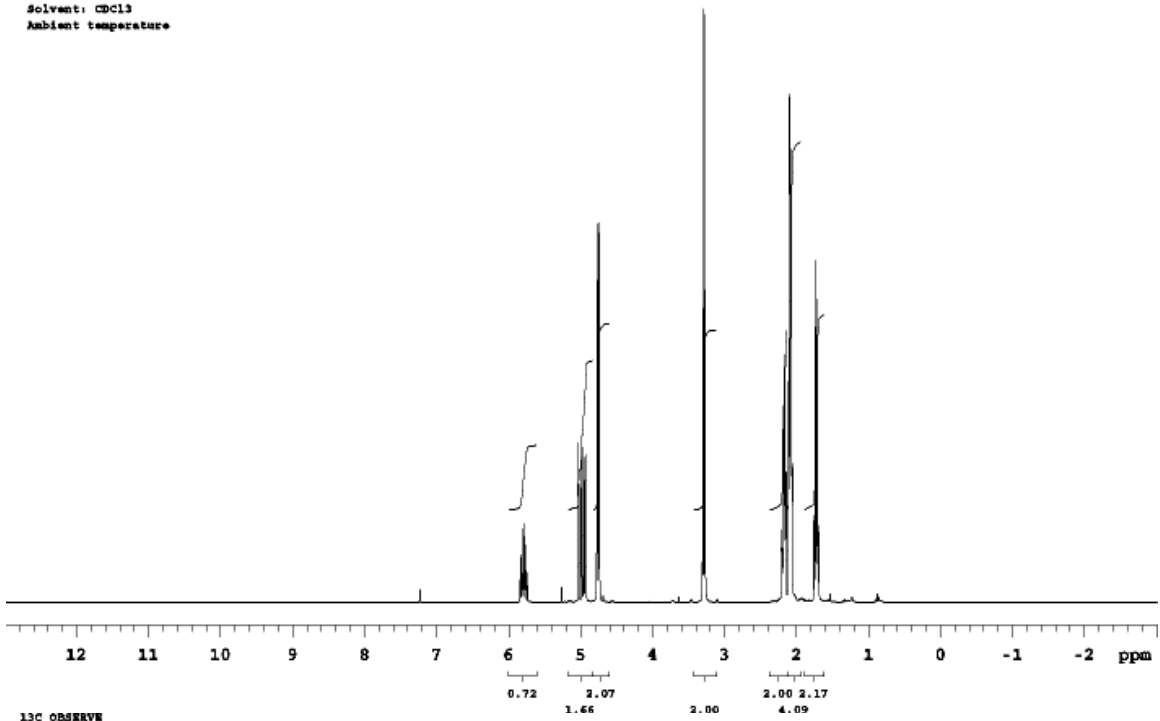

13C OBSERVE

el\_i\_196

Solvent: CDCl3  
Ambient temperature

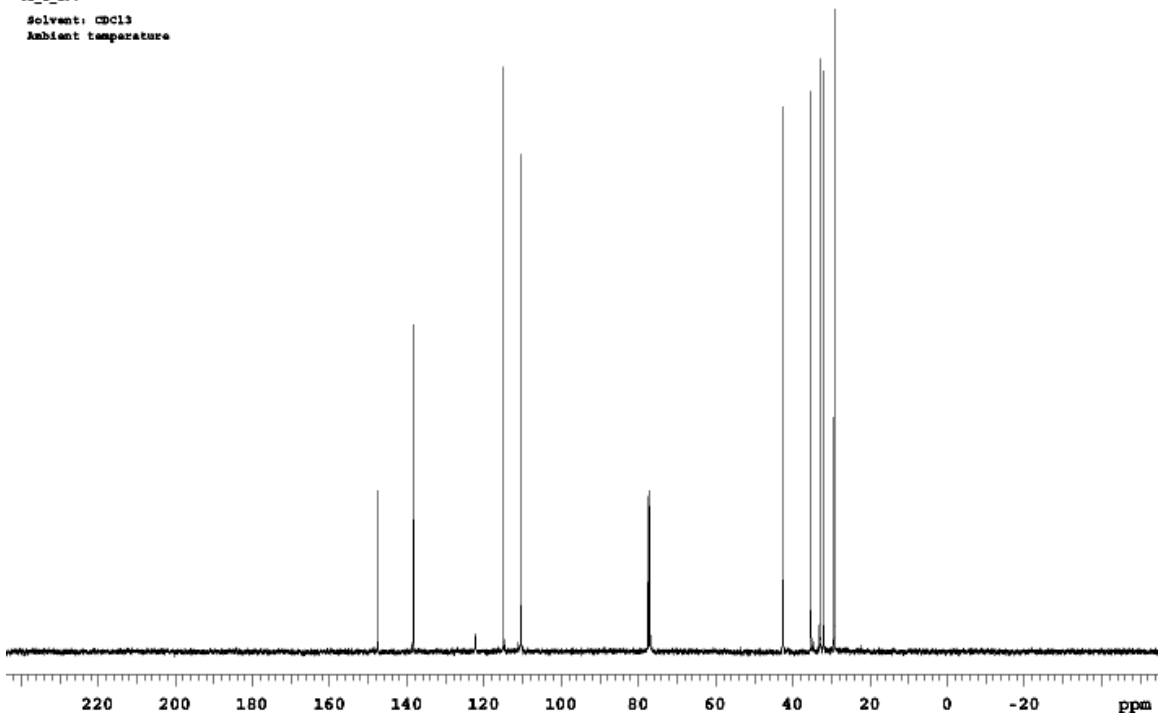



## 1.6 Synthesis of Ligands

Procedure A (**L3**, **L4** and **L5**): to a solution of diol in ether at 0°C, triethylamine (3 eq) then phosphorous trichloride (1.2 eq) were added. After 6 hours, amine (10 eq) were added, and the reaction warmed to room temperature and left for 2 hours. Filtration, concentration and purification by flash chromatography provides the desired product (after chromatography and concentration, products are dissolved in ether and concentrated again).

Procedure B (alternatively used for **L3**): to a solution of diol in toluene, hexamethyl phosphorous triamide (1.2 eq) was added. The reaction was then heated at reflux for 48 hours under a slow, dynamic flow of argon. The clear yellow solution was then cooled and diluted with hexanes. The white solid was filtered off, washed with hexanes and dried under vacuum.

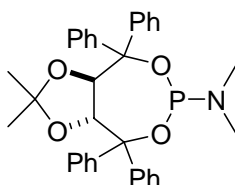

**(2,2-Dimethyl-4,4,8,8-tetraphenyl-tetrahydro-[1,3]dioxolo[4,5-e][1,3,2]dioxaphosphepin-6-yl)-dimethyl-amine (L3):** Flash Chromatography (Hexanes:EtOAc;95:5) yielded a white solid (Procedure A: 54%, Procedure B without chromatography: 74%).  $R_f = 0.50$  (Hexanes:EtOAc;90:10);  $^1\text{H NMR}$  (400 MHz,  $\text{CDCl}_3$ )  $\delta$  7.79 (2H, d,  $J = 11.0$  Hz), 7.63 (2H, d,  $J = 12.0$  Hz), 7.51 (2H, d,  $J = 11.0$  Hz), 7.48 (2H, d,  $J = 11.0$  Hz), 7.38-7.20 (12H, m), 5.22 (1H, dd,  $J = 12.0, 4.5$  Hz), 4.86 (1H, d,  $J = 11.0$  Hz), 2.76 (6H, d,  $J = 14.5$  Hz), 1.32 (3H, s), 0.33 (3H, s);  $^{13}\text{C NMR}$  (75 MHz,  $\text{CDCl}_3$ )  $\delta$  147.1, 146.7, 142.4, 142.4, 142.0, 129.2, 129.0, 128.9, 128.4, 128.0, 127.8, 127.7, 127.5, 127.4, 127.3, 112.0, 82.8 (d,  $J = 3.5$  Hz), 82.5, 82.1, 81.4 (d,  $J = 7.3$  Hz), 25.6 (d,  $J = 21.0$  Hz), 27.9, 25.6.

First Report: Keller, E.; Maurer, J.; Naasz, R.; Schader, T.; Meetsma, A.; Feringa, B. L. *Tetrahedron Asymmetry*, **1998**, 9, 2409, 2413.

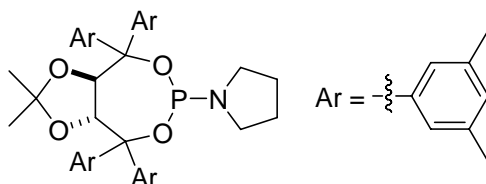

**1-[4,4,8,8-Tetrakis-(3,5-dimethyl-phenyl)-2,2-dimethyl-tetrahydro-[1,3]dioxolo[4,5-e][1,3,2]dioxaphosphepin-6-yl]-pyrrolidine (L4):** Flash Chromatography (Hexanes:EtOAc;95:5) yielded a white solid (50%).  $R_f = 0.50$  (Hexanes:EtOAc;90:10); IR (Thin Film)  $\nu$  2917, 2866, 1601, 1456, 1379, 1214, 1159, 1042, 854  $\text{cm}^{-1}$ ;  $^1\text{H NMR}$  (400 MHz,  $\text{CDCl}_3$ )  $\delta$  7.37 (2H, s), 7.16 (2H, s), 7.04 (2H, s), 7.02 (2H, s), 6.84 (3H, s), 6.80 (1H, s), 5.08 (1H, dd,  $J = 8.5, 2.5$  Hz), 4.74 (1H, d,  $J = 8.0$  Hz), 3.47-3.35 (2H, m), 3.35-3.15 (2H, m), 2.27 (6H, s), 2.25 (12H, s), 2.24 (6H, s), 1.86-1.72 (4H, m), 1.32 (3H, s), 0.25 (3H, s);  $^{13}\text{C NMR}$  (100 MHz,  $\text{CDCl}_3$ )

$\delta$  147.2, 146.9, 142.2, 142.1, 137.3, 136.9, 136.7, 136.3, 129.2, 128.9, 128.7, 127.9, 127.0, 126.8, 125.3, 125.2, 111.7, 83.1 (d,  $J = 4.5$  Hz), 82.9, 82.7, 81.8, 81.1 (d,  $J = 5.5$  Hz), 45.1 (d,  $J = 19.0$  Hz), 27.9, 26.3, 16.2, 25.7, 21.9, 21.8;  $^{31}\text{P}$  NMR (75 MHz,  $\text{CDCl}_3$ )  $\delta$  138.40; HRMS (ESI)  $m/e$  calcd ( $\text{M}+\text{H}^+$ ) 678.3707, found 678.3702.

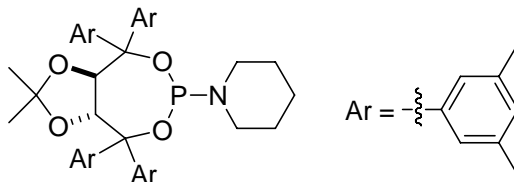

**(*R,R*)-1-[4,4,8,8-Tetrakis-(3,5-dimethyl-phenyl)-2,2-dimethyl-tetrahydro-[1,3]dioxolo[4,5-e][1,3,2]dioxaphosphin-6-yl]-piperidine (L5):** Flash Chromatography (Hexanes:EtOAc;95:5) yielded a white solid (52%);  $[\alpha]_{\text{D}} = -108.0^\circ$  ( $\text{CHCl}_3$ ,  $c=1.0$ );  $R_f = 0.50$  (Hexanes:EtOAc;90:10); IR (Thin Film)  $\nu$  2931, 2851, 1600, 1448, 1370, 1215, 1159, 1040, 940  $\text{cm}^{-1}$ ;  $^1\text{H}$  NMR (400 MHz,  $\text{CDCl}_3$ )  $\delta$  7.39 (2H, s), 7.20 (2H, s), 7.04 (4H, s), 6.84 (3H, s), 6.79 (1H, s), 5.02 (1H, dd,  $J = 8.5$ , 3.0 Hz), 4.67 (1H, d,  $J = 8.5$  Hz), 3.34-3.27 (2H, m), 3.20-3.08 (2H, m), 2.26 (6H, s), 2.26 (6H, s), 2.25 (6H, s), 2.24 (6H, s), 1.65-1.50 (6H, m), 1.37 (3H, s), 0.25 (3H, s);  $^{13}\text{C}$  NMR (100 MHz,  $\text{CDCl}_3$ )  $\delta$  147.5, 147.0, 142.1, 137.3, 136.9, 136.7, 136.4, 129.2, 128.9, 128.8, 128.7, 127.1, 126.8, 125.3, 111.5, 83.3, 82.9, 82.7, 81.4, 81.3, 81.2, 77.4, 45.3, 45.1, 27.9, 27.2, 27.2, 25.7, 25.5, 21.9, 21.8, 21.7;  $^{31}\text{P}$  NMR (75 MHz,  $\text{CDCl}_3$ )  $\delta$  138.76; HRMS (ESI)  $m/e$  calcd ( $\text{M}+\text{H}^+$ ) 692.3863, found 692.3843.

**I.7**  $^1\text{H}$  and  $^{13}\text{C}$  NMR Spectra for New Ligands

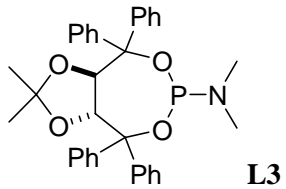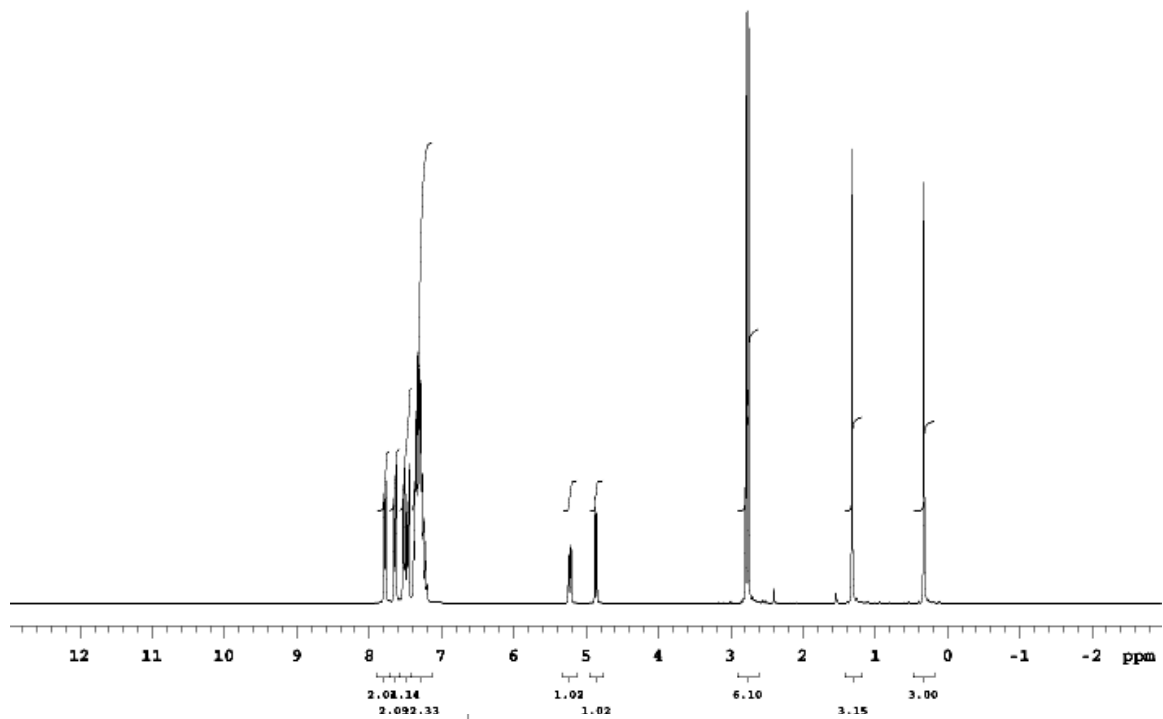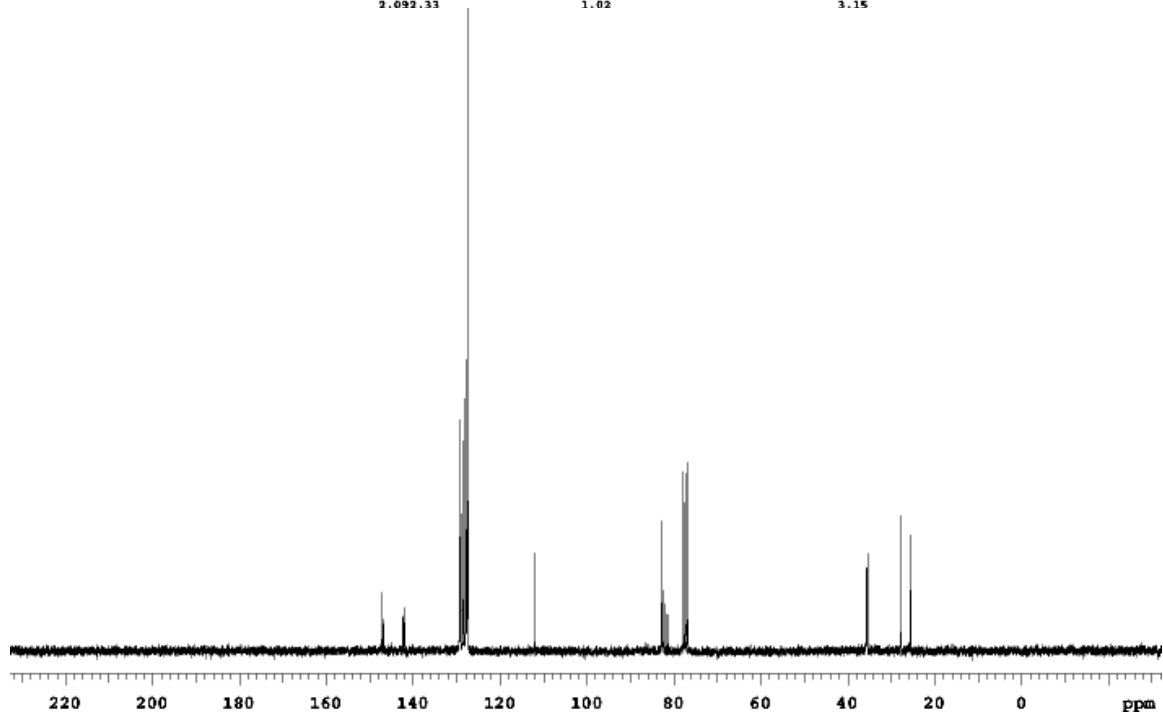

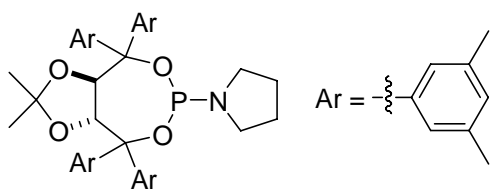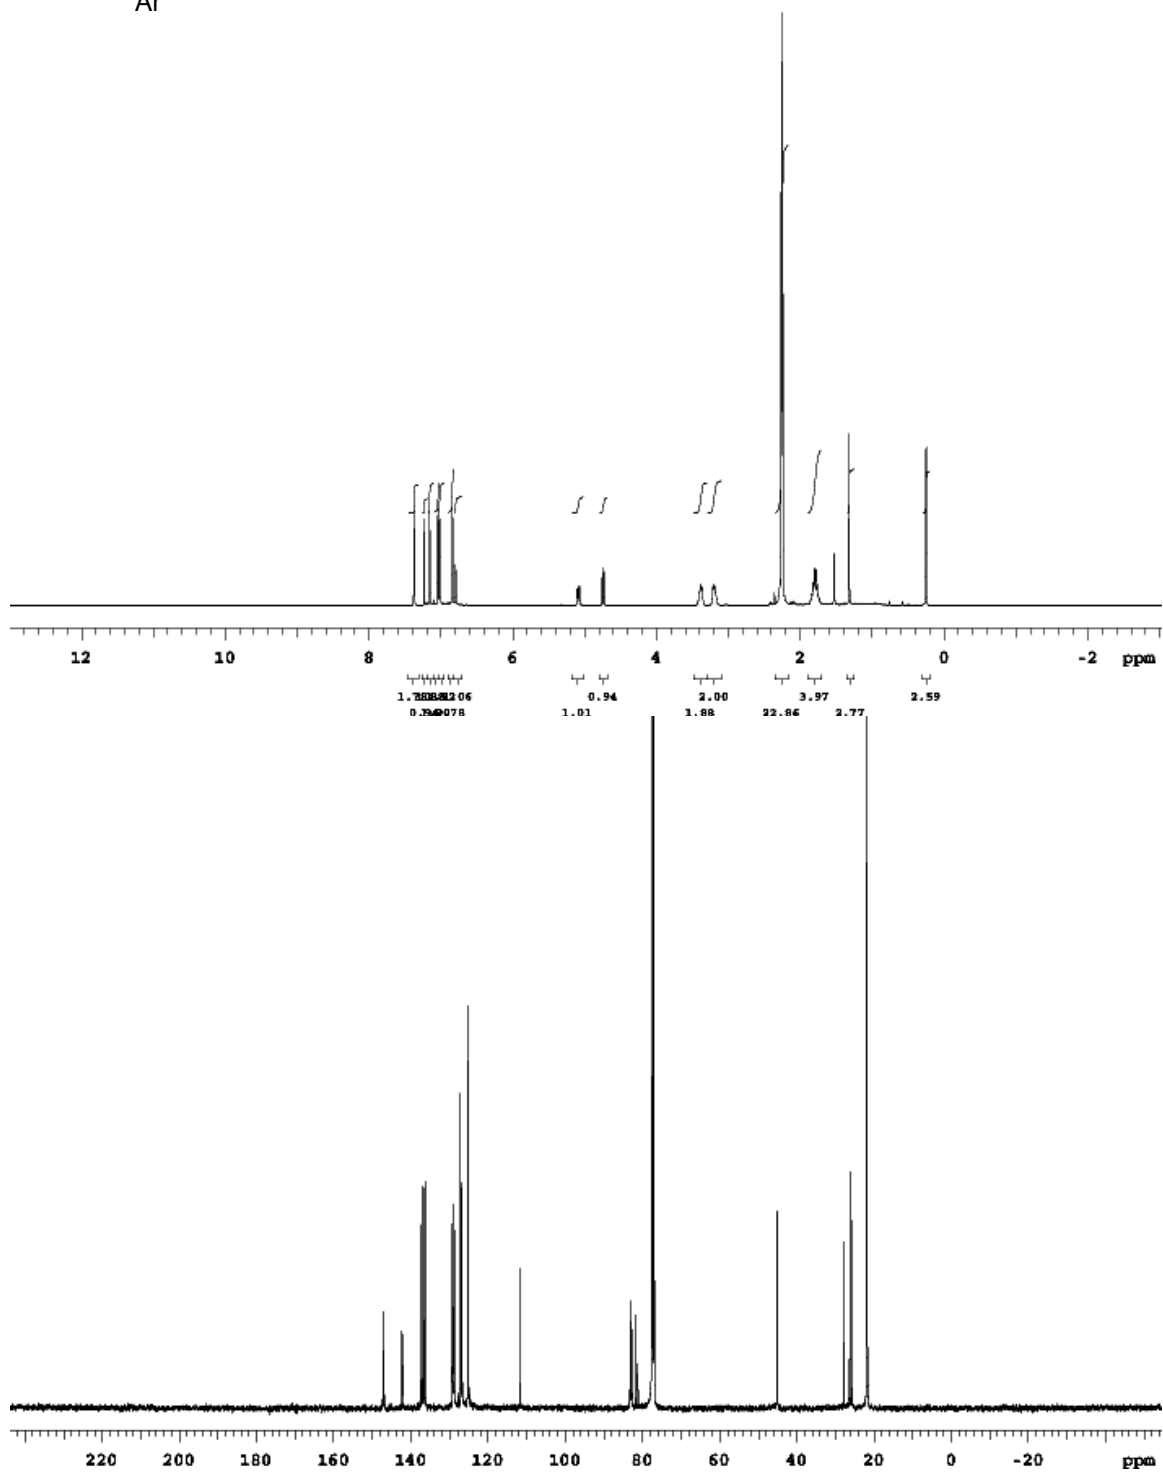

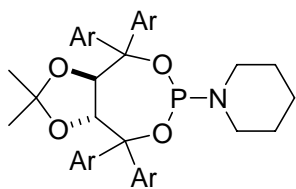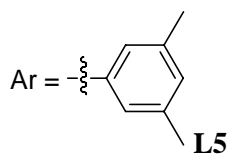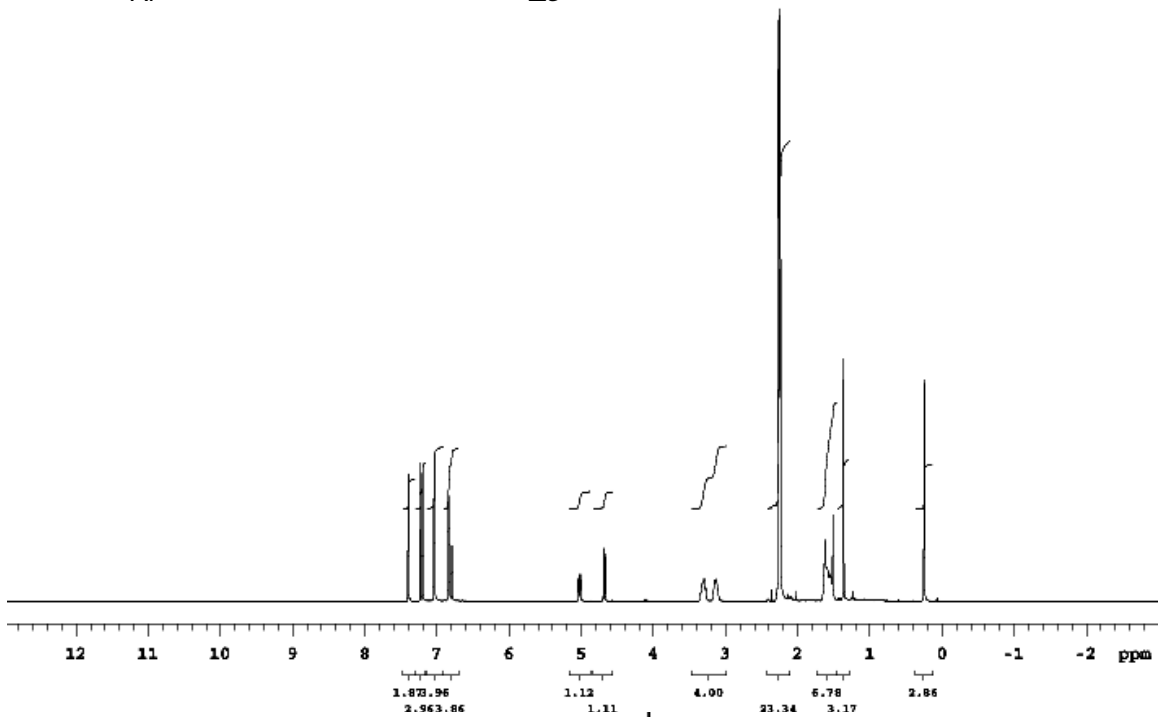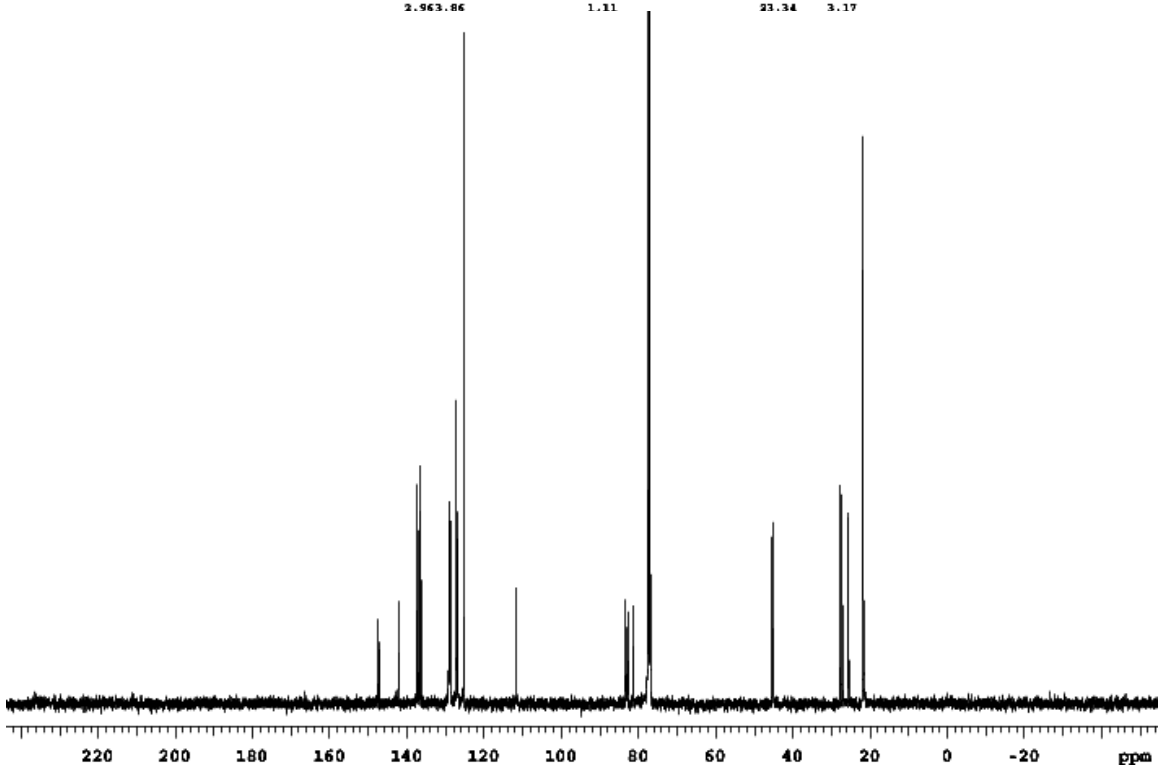

## I.8 General procedure for [2+2+2] cycloadditions with Aryl Alkynes.

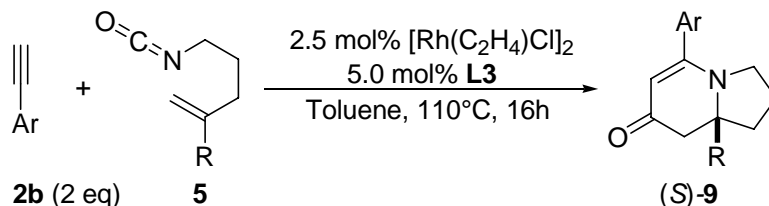

In a glovebox under  $\text{N}_2$  atmosphere, chlorobis(ethylene)rhodium(I) dimer (2.3 mg, 0.006 mmol) and dimethyl-TADDOL-phosphoramidite **L3** (6.5 mg, 0.012 mmol) were transferred into a round bottom flask fitted with a reflux condenser. The system was sealed with a standard septum, removed from the glovebox and flushed with Ar. A solution of alkyne (0.48 mmol) and isocyanate (0.24 mmol) in toluene (7 mL) was then added. The brown-black solution was then heated to  $110^\circ\text{C}$  (bath temperature), stirred at reflux for 16 hours under a static atmosphere of Ar, and cooled. The crude mixture was then concentrated and purified by silica gel, column chromatography.

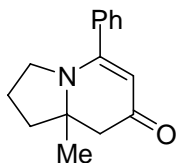

**(S)-8a-Methyl-5-phenyl-2,3,8,8a-tetrahydro-1H-indolizin-7-one (7a):** Flash Chromatography (Hexanes:EtOAc;1:6) yielded a clear syrup (76% yield); 91% ee by HPLC (Chiralcel ODH, Hex:*i*PrOH;85:15, 1 ml/min,  $\text{RT}_{\text{major}} = 20.9$  min,  $\text{RT}_{\text{minor}} = 15.0$  min);  $[\alpha]_{\text{D}} = +285.0^\circ$  ( $\text{CHCl}_3$ ,  $c=0.9$ );  $R_f = 0.20$  (100% EtOAc); IR (Thin Film)  $\nu$  2962, 2871, 1628, 1533, 1461, 1265, 1119  $\text{cm}^{-1}$ ;  $^1\text{H}$  NMR (300 MHz,  $\text{CDCl}_3$ )  $\delta$  7.40-7.25 (5H, m), 5.01 (1H, s), 3.59-3.51 (1H, m), 3.22-3.13 (1H, m), 2.69 (1H, d,  $J = 16.5$  Hz), 2.32 (1H, d,  $J = 16.5$  Hz), 2.10-1.90 (4H, m), 1.41 (3H, s);  $^{13}\text{C}$  NMR (100 MHz,  $\text{CDCl}_3$ )  $\delta$  191.8, 161.5, 136.8, 130.1, 128.6, 127.9, 99.3, 62.9, 50.2, 48.0, 40.0, 24.1, 22.0; MS (EI)  $m/e$  (rel intensity) 228 (100), 227 (27), 226 (11), 212 (19), 154 (9), 136 (12); HRMS (EI)  $m/e$  calcd ( $\text{M}^+$ ) 228.1388, found 228.1400.

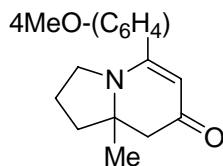

**(S)-5-(4-Methoxy-phenyl)-8a-methyl-2,3,8,8a-tetrahydro-1H-indolizin-7-one (7b):** Flash Chromatography (Hexanes:EtOAc;1:6) yielded a clear syrup (80%); 91% ee by HPLC (Chiralcel ODH, Hex:*i*PrOH;85:15, 1 ml/min,  $\text{RT}_{\text{major}} = 11.2$  min,  $\text{RT}_{\text{minor}} = 14.9$  min);  $[\alpha]_{\text{D}} = +225.0^\circ$  ( $\text{CHCl}_3$ ,  $c=0.6$ );  $R_f = 0.25$  (100% EtOAc); IR (Thin Film)  $\nu$  2964, 1606, 1578, 1508, 1461, 1245, 1174, 1028  $\text{cm}^{-1}$ ;  $^1\text{H}$  NMR (400 MHz,  $\text{CDCl}_3$ )  $\delta$  7.31 (2H, d,  $J = 8.5$  Hz), 6.88 (2H, d,  $J = 8.5$

Hz), 5.06 (1H, s), 3.81 (3H, s), 3.56 (1H, ddd,  $J = 10.5, 6.5, 6.5$  Hz), 3.18 (1H, m), 2.65 (1H, d,  $J = 16.5$  Hz), 2.26 (1H, d,  $J = 16.5$  Hz), 2.04-1.85 (4H, m), 1.38 (3H, s);  $^{13}\text{C}$  NMR (100 MHz,  $\text{CDCl}_3$ )  $\delta$  192.0, 161.6, 161.2, 129.8, 129.2, 114.0, 99.0, 62.7, 55.6, 50.6, 47.8, 39.9, 24.2, 22.3; MS (EI)  $m/e$  (rel intensity) 258 (100), 257 (34), 242 (14), 154 (10), 136 (7); HRMS (ESI)  $m/e$  calcd ( $\text{M}^+$ ) 258.1494, found 258.1485.

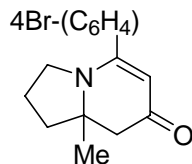

Flash Chromatography (Hex:EtOAc;1:4) yielded an off white solid **6c** (19%) followed by an off white solid **7c** (58%):

**(S)-5-(4-Bromo-phenyl)-8a-methyl-2,3,8,8a-tetrahydro-1H-indolizin-7-one (7c):** 88% ee by HPLC (Chiralcel ODH, Hex:*i*PrOH;85:15, 1 ml/min,  $\text{RT}_{\text{major}} = 10.1$  min,  $\text{RT}_{\text{minor}} = 14.5$  min);  $[\alpha]_{\text{D}} = [\alpha]_{\text{D}} = +153.0^\circ$  ( $\text{CHCl}_3$ ,  $c=0.5$ );  $R_f = 0.35$  (EtOAc 100%); IR (Thin Film)  $\nu$  2929, 2858, 1625, 1526, 1445, 1262, 1212  $\text{cm}^{-1}$ ;  $^1\text{H}$  NMR (400 MHz,  $\text{CDCl}_3$ )  $\delta$  7.52 (2H, d,  $J = 8.5$  Hz), 7.24 (2H, d,  $J = 8.5$  Hz), 5.04 (1H, s), 3.53-3.47 (1H, m), 3.17-3.10 (1H, m), 2.65 (1H, d,  $J = 16.0$  Hz), 2.30 (1H, d,  $J = 16.0$  Hz), 2.03-1.89 (4H, m), 1.37 (3H, s);  $^{13}\text{C}$  NMR (100 MHz,  $\text{CDCl}_3$ )  $\delta$  191.9, 160.5, 135.7, 132.1, 132.0, 129.7, 127.6, 124.6, 99.4, 63.0, 50.2, 47.7, 39.9, 24.0, 22.0; MS (FAB)  $m/e$  (rel intensity) 308 (20), 306 (22), 221 (18), 207 (17), 154 (16), 147 (29), 136 (23), 133 (100); HRMS (FAB)  $m/e$  calcd ( $\text{M}^+$ ) 306.0494, found 306.0487.

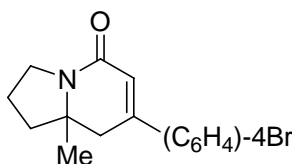

**(R)-7-(4-Bromo-phenyl)-8a-methyl-2,3,8,8a-tetrahydro-1H-indolizin-5-one (6c):** 82% ee by HPLC (Chiralcel ODH, Hex:*i*PrOH;85:15, 1 ml/min,  $\text{RT}_{\text{major}} = 7.5$  min,  $\text{RT}_{\text{minor}} = 8.2$  min);  $[\alpha]_{\text{D}} = +107.0^\circ$  ( $\text{CHCl}_3$ ,  $c=0.3$ );  $R_f = 0.45$  (EtOAc 100%); IR (Thin Film)  $\nu$  2967, 2882, 1645, 1595, 1459, 1434  $\text{cm}^{-1}$ ;  $^1\text{H}$  NMR (400 MHz,  $\text{CDCl}_3$ )  $\delta$  7.49 (2H, d,  $J = 8.5$  Hz), 7.32 (2H, d,  $J = 8.5$  Hz), 6.26 (1H, d,  $J = 1.5$  Hz), 3.66-3.54 (2H, m), 2.77 (1H, d,  $J = 16.5$  Hz), 2.71 (1H, dd,  $J = 16.5, 1.5$  Hz), 2.10-1.70 (4H, m), 1.22 (3H, s);  $^{13}\text{C}$  NMR (100 MHz,  $\text{CDCl}_3$ )  $\delta$  163.1, 146.5, 137.4, 132.1, 127.6, 123.7, 120.4, 61.0, 43.9, 41.0, 40.2, 23.7, 21.6.

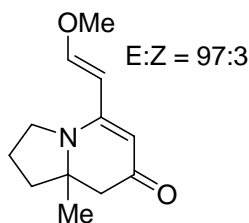

**(S)-5-(2-Methoxy-vinyl)-8a-methyl-2,3,8,8a-tetrahydro-1H-indolizin-7-one (7d):** Flash Chromatography (Hex:EtOAc;1:6) yielded a yellow syrup (58%); 91% ee by HPLC (Chiralcel ODH, Hex:*i*PrOH;80:20, 1 ml/min,  $\text{RT}_{\text{major}} = 9.3$  min,  $\text{RT}_{\text{minor}} = 14.4$  min);  $[\alpha]_{\text{D}} = +342.0^\circ$  ( $\text{CHCl}_3$ ,  $c=1.3$ );  $R_f = 0.25$  (EtOAc 100%); IR (Thin Film)  $\nu$  2965, 2871, 1627, 1530, 1495, 1277,

1009  $\text{cm}^{-1}$ ;  $^1\text{H}$  NMR (400 MHz,  $\text{CDCl}_3$ )  $\delta$  7.11 (1H, d,  $J = 12.5$  Hz), 5.26 (1H, d,  $J = 12.5$  Hz), 5.03 (1H, s), 3.65 (3H, s), 3.62-3.55 (1H, m), 3.43-3.35 (1H, m), 2.50 (1H, d,  $J = 16.0$  Hz), 2.26 (1H, d,  $J = 16.0$  Hz), 2.05-1.93 (3H, m), 1.84-1.75 (1H, m), 1.21 (3H, s);  $^{13}\text{C}$  NMR (100 MHz,  $\text{CDCl}_3$ )  $\delta$  190.4, 157.5, 156.8, 99.5, 91.5, 62.6, 57.8, 48.5, 47.7, 40.0, 22.6, 20.5; MS (FAB)  $m/e$  (rel intensity) 208 (100), 207 (39), 155 (23), 154 (76), 139 (10), 138 (25), 137 (46), 136 (43); HRMS (FAB)  $m/e$  calcd ( $\text{M}+\text{H}^+$ ) 208.1332, found 208.1337.

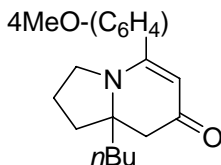

**(S)-8a-Butyl-5-(4-methoxy-phenyl)-2,3,8,8a-tetrahydro-1H-indolizin-7-one (9b):** Flash Chromatography (Hexanes:EtOAc;1:6) yielded a clear syrup (71%); 90% ee by HPLC (Chiralcel ODH, Hex:*i*PrOH; 80:20, 1 ml/min,  $\text{RT}_{\text{major}} = 6.6$  min,  $\text{RT}_{\text{minor}} = 9.5$  min);  $[\alpha]_{\text{D}} = 305.0^\circ$  ( $\text{CHCl}_3$ ,  $c=0.8$ );  $R_f = 0.35$  (100% EtOAc); IR (Thin Film)  $\nu$  2956, 1605, 1626, 1578, 1508, 1453, 1243, 1173  $\text{cm}^{-1}$ ;  $^1\text{H}$  NMR (400 MHz,  $\text{CDCl}_3$ )  $\delta$  7.34 (2H, d,  $J = 8.0$  Hz), 6.88 (2H, d,  $J = 8.0$  Hz), 5.07 (1H, s), 3.81 (3H, s), 3.48 (1H, ddd,  $J = 11.0, 7.5, 7.5$  Hz), 3.23 (1H, ddd,  $J = 11.0, 5.0, 5.0$  Hz), 2.62 (1H, d,  $J = 16.5$  Hz), 2.31 (1H, d,  $J = 16.5$  Hz), 2.11-2.04 (1H, m), 1.90-1.72 (5H, m), 1.44-1.16 (4H, m), 0.87 (3H, t,  $J = 7.0$  Hz);  $^{13}\text{C}$  NMR (100 MHz,  $\text{CDCl}_3$ )  $\delta$  192.2, 161.9, 161.4, 129.9, 129.4, 114.1, 99.1, 65.5, 55.6, 52.1, 45.8, 36.8, 34.2, 26.6, 25.0, 23.3, 14.3; HRMS (ESI)  $m/e$  calcd ( $\text{M}^+$ ) 300.1958, found 300.1960.

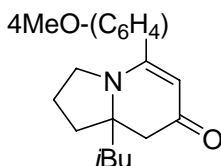

**(S)-8a-Isobutyl-5-(4-methoxy-phenyl)-2,3,8,8a-tetrahydro-1H-indolizin-7-one (9c):** Flash Chromatography (Hexanes:EtOAc;1:6) yielded a clear syrup (75%); 94% ee by HPLC (Chiralcel ODH, Hex:*i*PrOH; 80:20, 1 ml/min,  $\text{RT}_{\text{major}} = 6.7$  min,  $\text{RT}_{\text{minor}} = 10.4$  min);  $[\alpha]_{\text{D}} = 314.0^\circ$  ( $\text{CHCl}_3$ ,  $c=1.0$ );  $R_f = 0.33$  (100% EtOAc); IR (Thin Film)  $\nu$  2955, 1606, 1627, 1508, 1456, 1246, 1174  $\text{cm}^{-1}$ ;  $^1\text{H}$  NMR (400 MHz,  $\text{CDCl}_3$ )  $\delta$  7.34 (2H, d,  $J = 7.0$  Hz), 6.88 (2H, d,  $J = 7.0$  Hz), 5.11 (1H, s), 3.81 (3H, s), 3.52 (1H, ddd,  $J = 11.0, 7.5, 7.5$  Hz), 3.23 (1H, ddd,  $J = 11.0, 5.5, 5.5$  Hz), 2.62 (1H, d,  $J = 16.0$  Hz), 2.31 (1H, d,  $J = 16.0$  Hz), 2.15-2.08 (1H, m), 1.91-1.81 (4H, m), 1.77-1.68 (1H, m), 1.60 (1H, dd,  $J = 14.0, 7.0$  Hz), 0.95 (3H, d,  $J = 6.5$  Hz), 0.93 (3H, d,  $J = 6.5$  Hz);  $^{13}\text{C}$  NMR (100 MHz,  $\text{CDCl}_3$ )  $\delta$  192.3, 161.9, 161.4, 129.9, 129.3, 114.1, 99.4, 65.8, 55.6, 45.7, 42.7, 37.7, 25.4, 25.0, 24.8, 24.3; HRMS (ESI)  $m/e$  calcd ( $\text{M}^+$ ) 300.1958, found 300.1944.

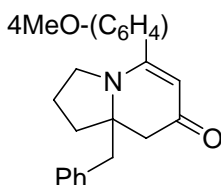

**(S)-8a-Benzyl-5-(4-methoxy-phenyl)-2,3,8,8a-tetrahydro-1H-indolizin-7-one (9d):** Flash Chromatography (Hex:EtOAc;1:6) yielded a light yellow solid (80%); 92% ee by HPLC (Chiralcel ODH, Hex:*i*PrOH;85:15, 1 ml/min,  $\text{RT}_{\text{major}} = 13.4$  min,  $\text{RT}_{\text{minor}} = 19.5$  min);  $[\alpha]_{\text{D}} = 235.0^\circ$  ( $\text{CHCl}_3$ ,  $c=1.1$ );  $R_f = 0.25$  (EtOAc 100%); IR (Thin Film)  $\nu$  2962, 1625, 1605, 1508, 1454,



1245, 1175, 1027  $\text{cm}^{-1}$ ;  $^1\text{H}$  NMR (400 MHz,  $\text{CDCl}_3$ )  $\delta$  7.36 (2H, d,  $J = 7.0$  Hz), 7.32-7.23 (3H, m), 7.18 (2H, d,  $J = 8.0$  Hz), 6.89 (2H, d,  $J = 8.0$  Hz), 5.25 (1H, s), 3.81 (3H, s), 3.34 (1H, d,  $J = 13.5$  Hz), 3.13-3.10 (1H, m), 3.15-2.97 (1H, m), 2.78 (1H, d,  $J = 13.0$  Hz), 2.65 (1H, d,  $J = 16.0$  Hz), 2.34 (1H, d,  $J = 16.0$  Hz), 2.30-2.22 (1H, m), 1.78-1.69 (2H, m), 1.65-1.60 (1H, m);  $^{13}\text{C}$  NMR (100 MHz,  $\text{CDCl}_3$ )  $\delta$  192.2, 161.8, 161.6, 137.1, 131.2, 130.2, 128.9, 128.3, 126.9, 114.1, 99.4, 65.9, 55.6, 52.4, 46.5, 39.0, 35.7, 24.5; HRMS (FAB)  $m/e$  calcd ( $\text{M}+\text{H}^+$ ) 334.1786, found 334.1795.

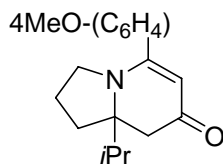

**(S)-8a-Isopropyl-5-(4-methoxy-phenyl)-2,3,8,8a-tetrahydro-1H-indolizin-7-one (9e):** Flash Chromatography (Hexanes:EtOAc;1:3) yielded a yellow syrup (50%); 91% ee by HPLC (Chiralcel ODH, Hex:*i*PrOH; 85:15, 1 ml/min,  $\text{RT}_{\text{major}} = 8.8$  min,  $\text{RT}_{\text{minor}} = 10.3$  min);  $[\alpha]_{\text{D}} = +320.0^\circ$  ( $\text{CHCl}_3$ ,  $c=0.9$ );  $R_f = 0.40$  (100% EtOAc); IR (Thin Film)  $\nu$  2966, 2874, 1627, 1606, 1508, 1453, 1243  $\text{cm}^{-1}$ ;  $^1\text{H}$  NMR (400 MHz,  $\text{CDCl}_3$ )  $\delta$  7.37 (2H, d,  $J = 8.0$  Hz), 6.88 (2H, d,  $J = 8.0$  Hz), 5.14 (1H, s), 3.81 (3H, s), 3.41 (1H, ddd,  $J = 10.5, 8.5, 8.0$  Hz), 3.31 (1H, ddd,  $J = 10.5, 5.5, 3.5$  Hz), 2.65 (1H, sept,  $J = 7.0$  Hz), 2.64 (1H, d,  $J = 16.5$  Hz), 2.50 (1H, d,  $J = 16.5$  Hz), 2.12-2.01 (1H, m), 1.90-1.82 (2H, m), 1.64-1.58 (1H, m), 0.98 (3H, d,  $J = 7.0$  Hz), 0.90 (3H, d,  $J = 7.0$  Hz);  $^{13}\text{C}$  NMR (100 MHz,  $\text{CDCl}_3$ )  $\delta$  192.1, 162.4, 161.6, 130.1, 129.4, 114.1, 99.3, 69.0, 55.6, 54.0, 44.1, 31.5, 28.7, 25.5, 17.6, 17.5; MS (EI)  $m/e$  (rel intensity) 286 (100), 285 (15), 242 (48); HRMS (ESI)  $m/e$  calcd ( $\text{M}^+$ ) 286.1807, found 286.1808.

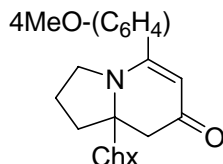

**8a-Cyclohexyl-5-(4-methoxy-phenyl)-2,3,8,8a-tetrahydro-1H-indolizin-7-one (9f):** Flash Chromatography (Hexanes:EtOAc;1:4) yielded a light yellow syrup (19%); 87% ee by HPLC (Chiralcel ODH, Hex:*i*PrOH; 85:15, 1 ml/min,  $\text{RT}_{\text{major}} = 8.6$  min,  $\text{RT}_{\text{minor}} = 15.9$  min);  $[\alpha]_{\text{D}} = 206.0^\circ$  ( $\text{CHCl}_3$ ,  $c=0.8$ );  $R_f = 0.25$  (EtOAc 100%); IR (Thin Film)  $\nu$  2928, 2851, 1605, 1577, 1535, 1507, 1452, 1247, 1174  $\text{cm}^{-1}$ ;  $^1\text{H}$  NMR (400 MHz,  $\text{CDCl}_3$ )  $\delta$  7.38 (2H, d,  $J = 8.5$  Hz), 6.89 (2H, d,  $J = 8.5$  Hz), 5.10 (1H, s), 3.82 (3H, s), 3.37 (1H, ddd,  $J = 10.0, 8.0, 8.0$  Hz), 3.28 (1H, m,  $J = 10.0, 3.5, 3.5$  Hz), 2.60 (1H, d,  $J = 16.5$  Hz), 2.51 (1H, d,  $J = 16.5$  Hz), 2.28-2.20 (1H, m), 2.11 (1H, ddd,  $J = 12.0, 9.0, 9.0$  Hz), 1.90-1.56 (8H, m), 1.25-0.90 (5H, m);  $^{13}\text{C}$  NMR (100 MHz,  $\text{CDCl}_3$ )  $\delta$  192.3, 162.3, 161.6, 130.2, 129.5, 114.1, 99.2, 68.6, 55.6, 53.9, 43.9, 39.4, 33.1, 27.6, 27.3, 26.7, 26.6, 26.5, 25.7; HRMS (ESI)  $m/e$  calcd ( $\text{M}^+$ ) 326.2115, found 326.2100.

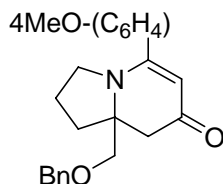

**(S)-8a-Benzyloxymethyl-5-(4-methoxy-phenyl)-2,3,8,8a-tetrahydro-1H-indolizin-7-one (9g):** Flash Chromatography (Hex:EtOAc;1:6) yielded a yellow syrup (77%); 92% ee by HPLC

(Chiralcel ODH, Hex:*i*PrOH; 80:20, 1 ml/min, RT<sub>major</sub> = 11.3 min, RT<sub>minor</sub> = 14.1 min); [α]<sub>D</sub> = 165.0° (CHCl<sub>3</sub>, c=1.0); R<sub>f</sub> = 0.26 (EtOAc 100%); IR (Thin Film) ν 2965, 2870, 1626, 1606, 1509, 1453, 1246, 1175, 1106, 1028 cm<sup>-1</sup>; <sup>1</sup>H NMR (400 MHz, CDCl<sub>3</sub>) δ 7.33-7.24 (7H, m), 6.87 (2H, d, *J* = 8.0 Hz), 5.05 (1H), 4.54 (1H, d, *J* = 12.0 Hz), 4.50 (1H, d, *J* = 12.0 Hz), 3.82 (1H, d, *J* = 10.0 Hz), 3.80 (3H, s), 3.60-3.52 (1H, m), 3.47 (1H, d, *J* = 10.0 Hz), 3.23-3.17 (1H, m), 2.63 (1H, d, *J* = 16.0 Hz), 2.45 (1H, d, *J* = 16.0 Hz), 2.44-2.35 (1H, m), 2.00-1.75 (3H, m); <sup>13</sup>C NMR (100 MHz, CDCl<sub>3</sub>) δ 191.5, 162.1, 161.4, 138.4, 130.0, 129.1, 128.6, 127.8, 127.6, 114.0, 99.0, 73.7, 70.3, 65.5, 55.6, 52.2, 43.6, 35.5, 24.6; HRMS (FAB) *m/e* calcd (M+H<sup>+</sup>) 364.1907, found 364.1907.

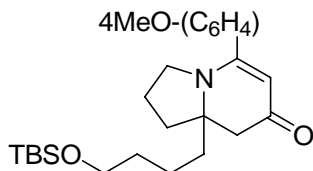

**(S)-8a-[4-(tert-Butyl-dimethyl-silyloxy)-butyl]-5-(4-methoxy-phenyl)-2,3,8,8a-tetrahydro-1H-indolizin-7-one (9h):** Flash Chromatography (Hexanes:EtOAc;1:6) yielded a clear syrup (74%); 88% ee by HPLC (Chiralcel ADH, Hex:*i*PrOH; 90:10, 1 ml/min, RT<sub>major</sub> = 8.3 min, RT<sub>minor</sub> = 7.8 min); [α]<sub>D</sub> = +138.0° (CHCl<sub>3</sub>, c=0.9); R<sub>f</sub> = 0.23 (100% EtOAc); IR (Thin Film) ν 2933, 1605, 1507, 1461, 1246, 1174, 1026 cm<sup>-1</sup>; <sup>1</sup>H NMR (300 MHz, CDCl<sub>3</sub>) δ 7.37 (2H, d, *J* = 8.5 Hz), 6.90 (2H, d, *J* = 8.5 Hz), 5.12 (1H, s), 3.84 (3H, s), 3.66-3.58 (2H, m), 3.56-3.46 (1H, m), 3.27 (1H, ddd, *J* = 11.0, 5.0, 5.0 Hz), 2.68 (1H, d, *J* = 16.5 Hz), 2.35 (1H, d, *J* = 16.5 Hz), 2.20-2.04 (1H, m), 1.95-1.76 (5H, m), 1.60-1.35 (4H, m), 0.89 (9H, s), 0.04 (6H, s); <sup>13</sup>C NMR (100 MHz, CDCl<sub>3</sub>) δ 193.2, 162.2, 161.5, 130.0, 129.3, 114.1, 99.2, 65.6, 63.1, 55.6, 52.4, 45.9, 36.7, 34.3, 33.3, 26.2, 25.0, 20.9, 18.6, -5.0; MS (EI) *m/e* (rel intensity) 431 (32), 430 (100), 428 (13), 372 (18), 243 (21), 242 (53); HRMS (EI) *m/e* calcd (M<sup>+</sup>) 430.2777, found 430.2765.

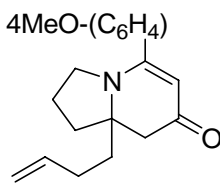

**(S)-8a-But-3-enyl-5-(4-methoxy-phenyl)-2,3,8,8a-tetrahydro-1H-indolizin-7-one (9i):** Flash Chromatography (Hexanes:EtOAc;1:6) yielded a clear syrup (75%); 91% ee by HPLC (Chiralcel ODH, Hex:*i*PrOH;85:15, 1 ml/min, RT<sub>major</sub> = 9.6 min, RT<sub>minor</sub> = 15.5 min); [α]<sub>D</sub> = +288.0° (CHCl<sub>3</sub>, c=1.0); R<sub>f</sub> = 0.20 (100% EtOAc); IR (Thin Film) ν 2969, 2872, 1605, 1578, 1537, 1508, 1454, 1244, 1175, 1028, 913 cm<sup>-1</sup>; <sup>1</sup>H NMR (400 MHz, CDCl<sub>3</sub>) δ 7.33 (2H, d, *J* = 8.0 Hz), 6.87 (2H, d, *J* = 8.0 Hz), 5.76 (1H, ddt, *J* = 17.0, 10.5, 6.5 Hz), 5.09 (1H, s), 5.00 (1H, dd, *J* = 17.0, 1.5 Hz), 4.92 (1H, dd, *J* = 10.5, 1.0 Hz), 3.80 (3H, s), 3.49 (1H, ddd, *J* = 11.0, 7.5, 3.5 Hz), 3.24 (1H, ddd, *J* = 11.0, 5.5, 5.5 Hz), 2.64 (1H, d, *J* = 16.5 Hz), 2.31 (1H, d, *J* = 16.5 Hz), 2.25-2.00 (3H, m), 1.94-1.75 (5H, m); <sup>13</sup>C NMR (100 MHz, CDCl<sub>3</sub>) δ 200.0, 162.1, 161.5, 138.1, 130.0, 129.2, 115.1, 114.1, 99.4, 65.3, 55.6, 52.3, 45.7, 36.8, 33.7, 28.9, 25.0; MS (EI) *m/e* (rel intensity) 298 (100), 297 (23), 243 (20), 242 (18), 154 (22), 137 (13), 136 (13); HRMS (ESI) *m/e* calcd (M<sup>+</sup>) 298.1807, found 298.1808.

**I.9**  $^1\text{H}$  and  $^{13}\text{C}$  NMR Spectra for [2+2+2] Products from Aryl Alkynes

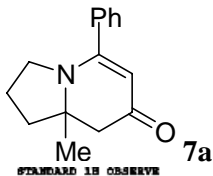

solvent: CDCl<sub>3</sub>  
Ambient temperature

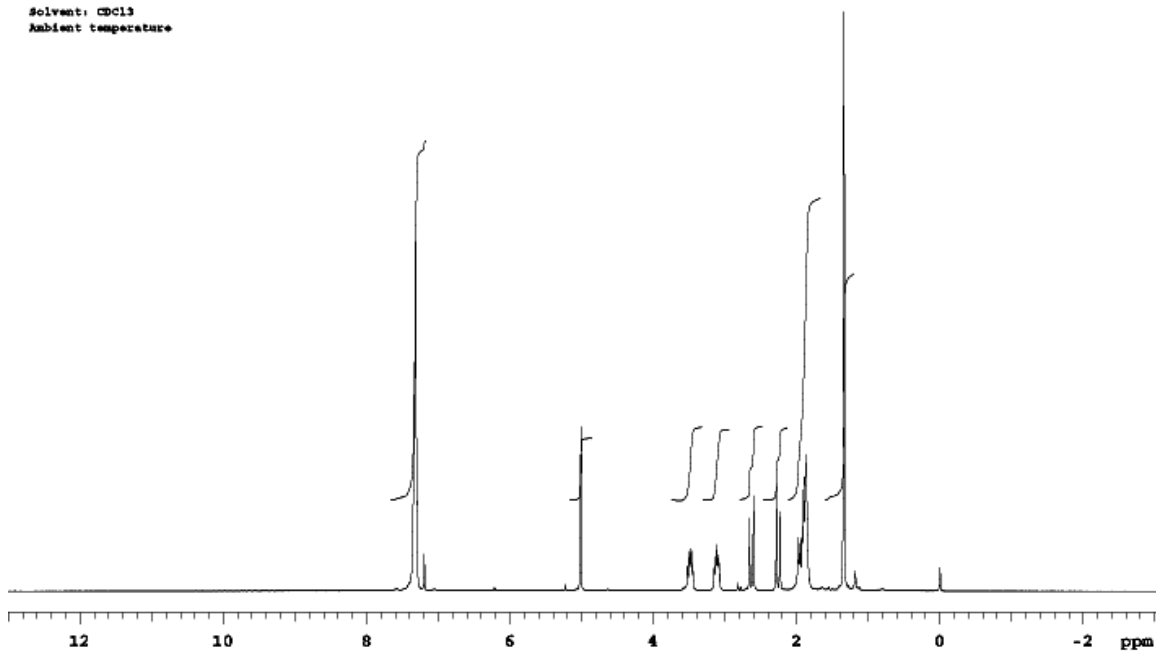

13C OBSERVE

el\_i\_114A\_3

solvent: CDCl<sub>3</sub>  
Ambient temperature

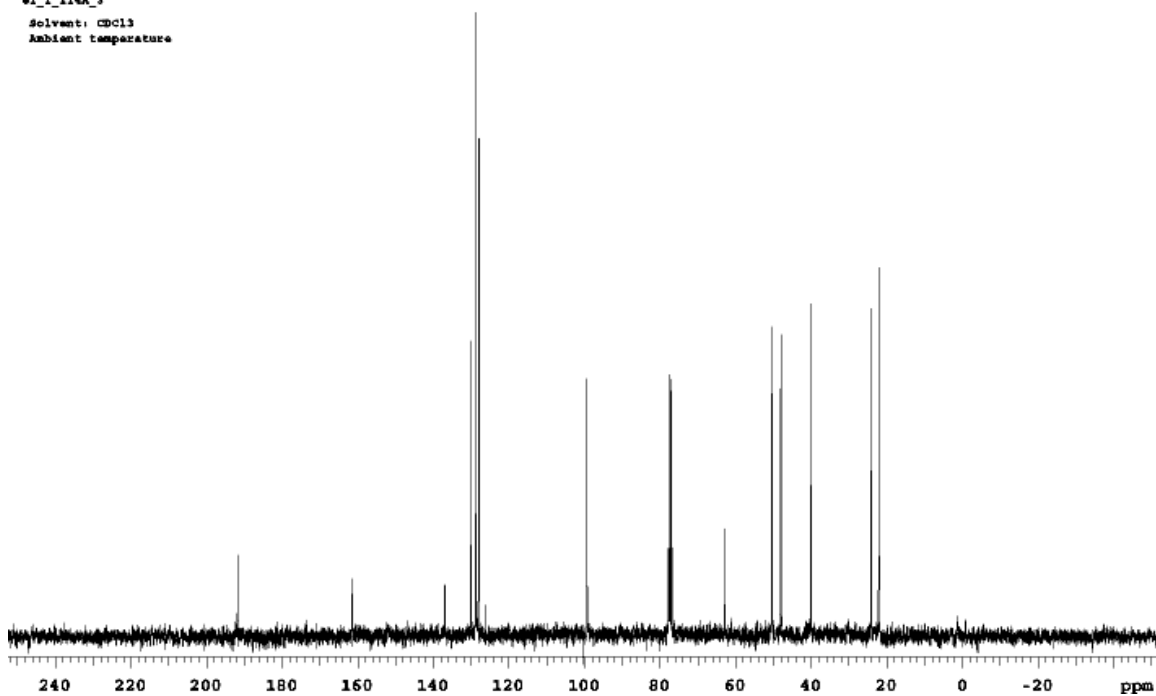

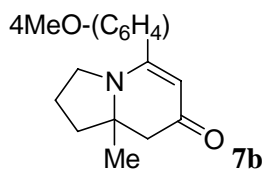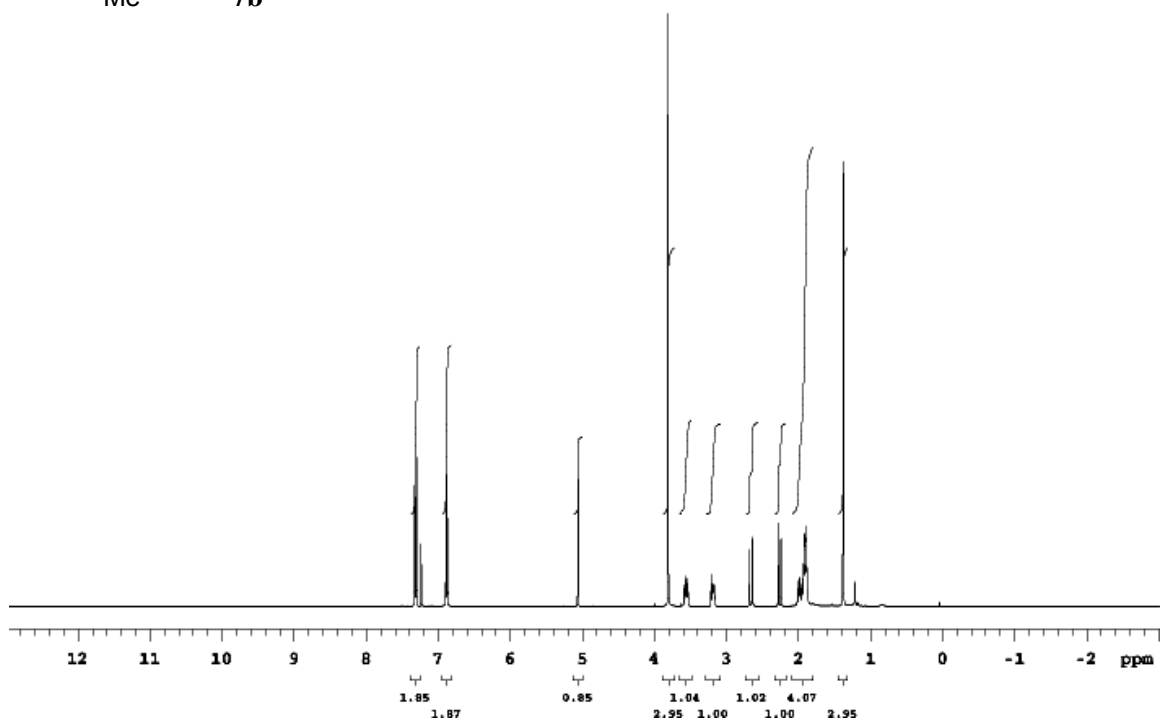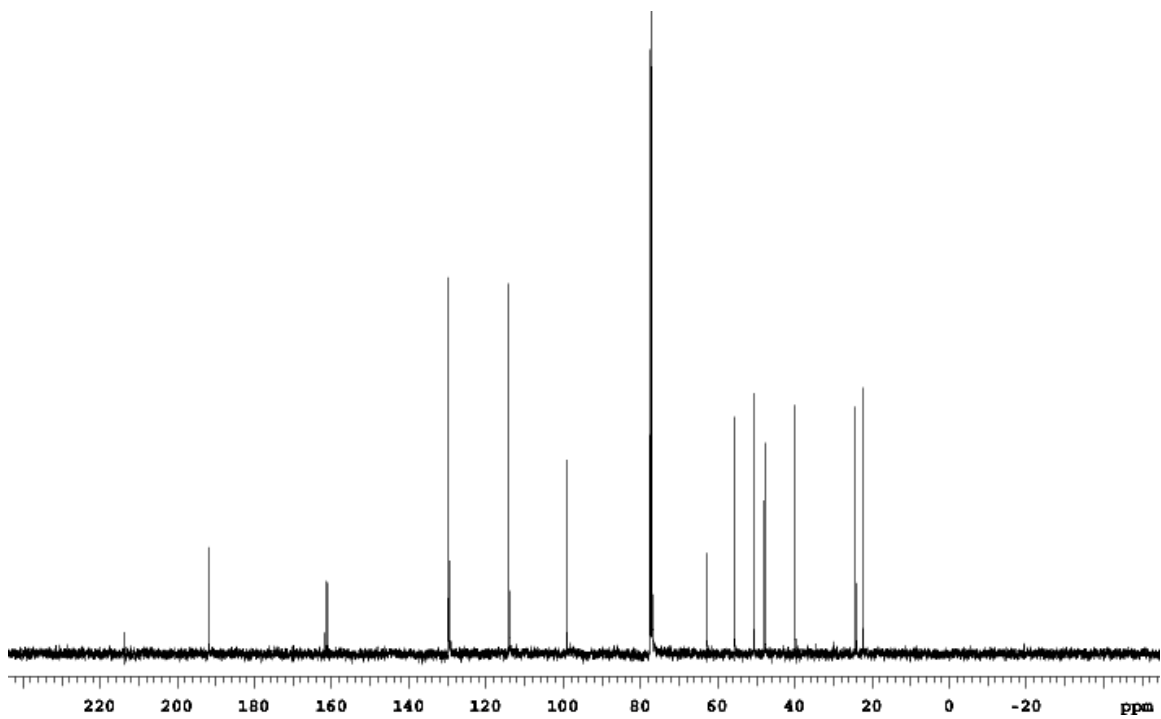

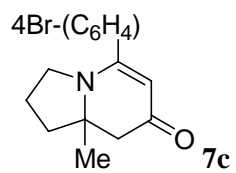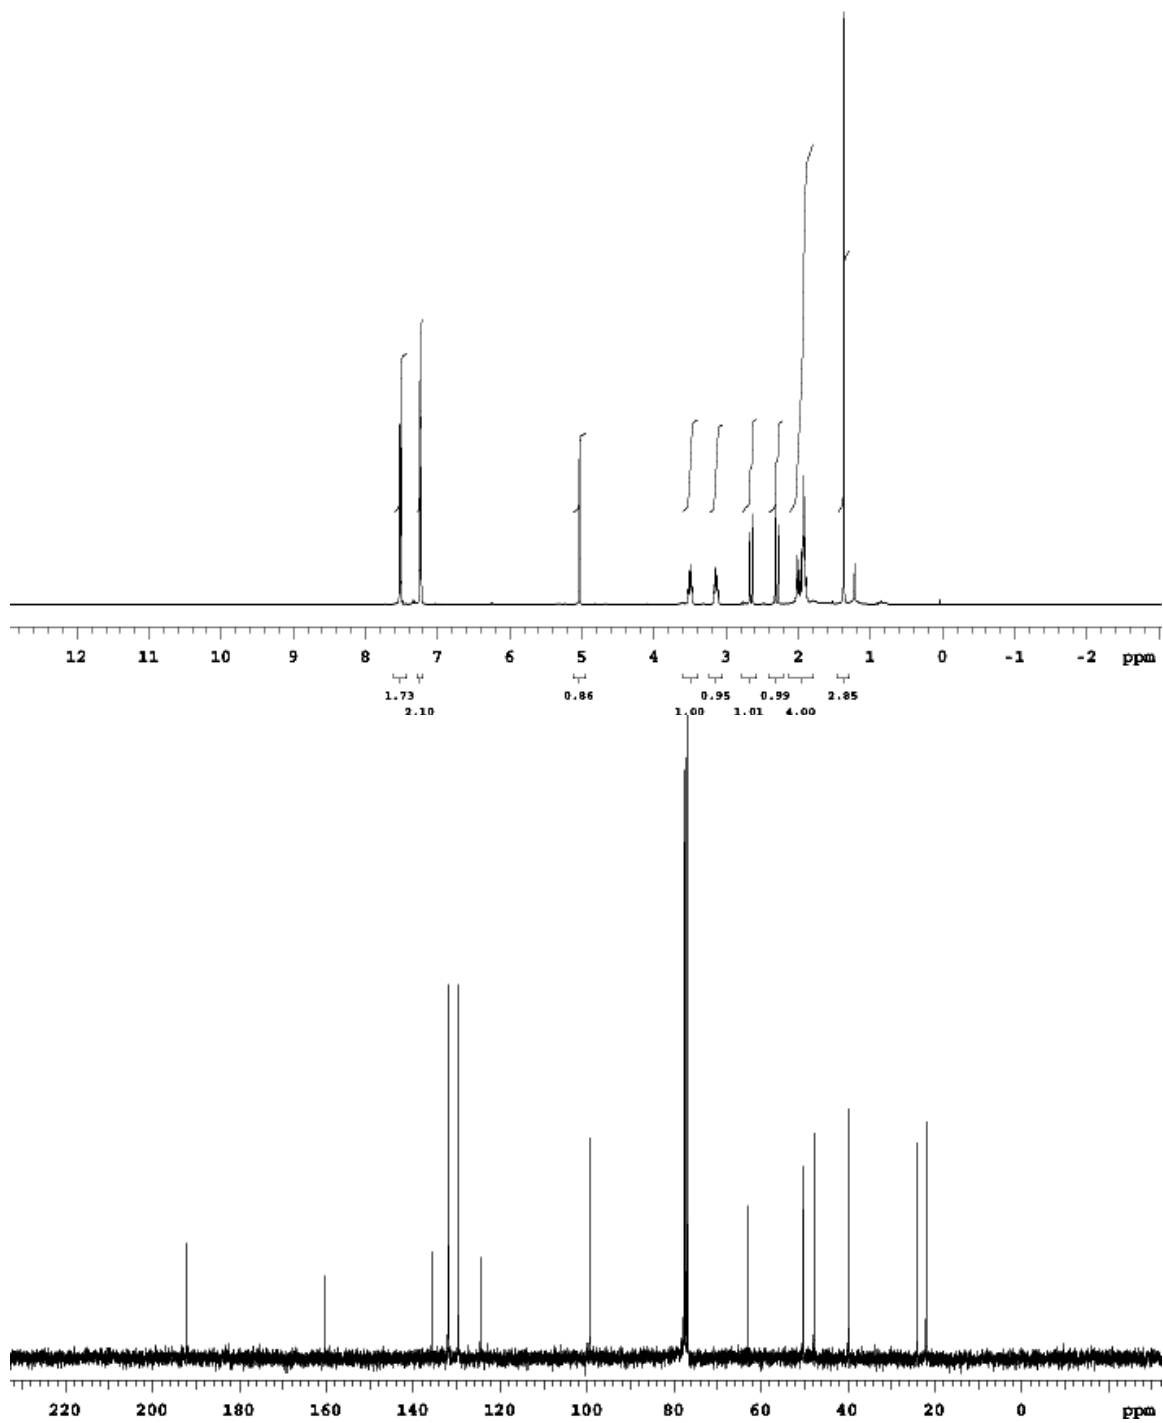

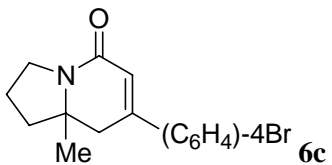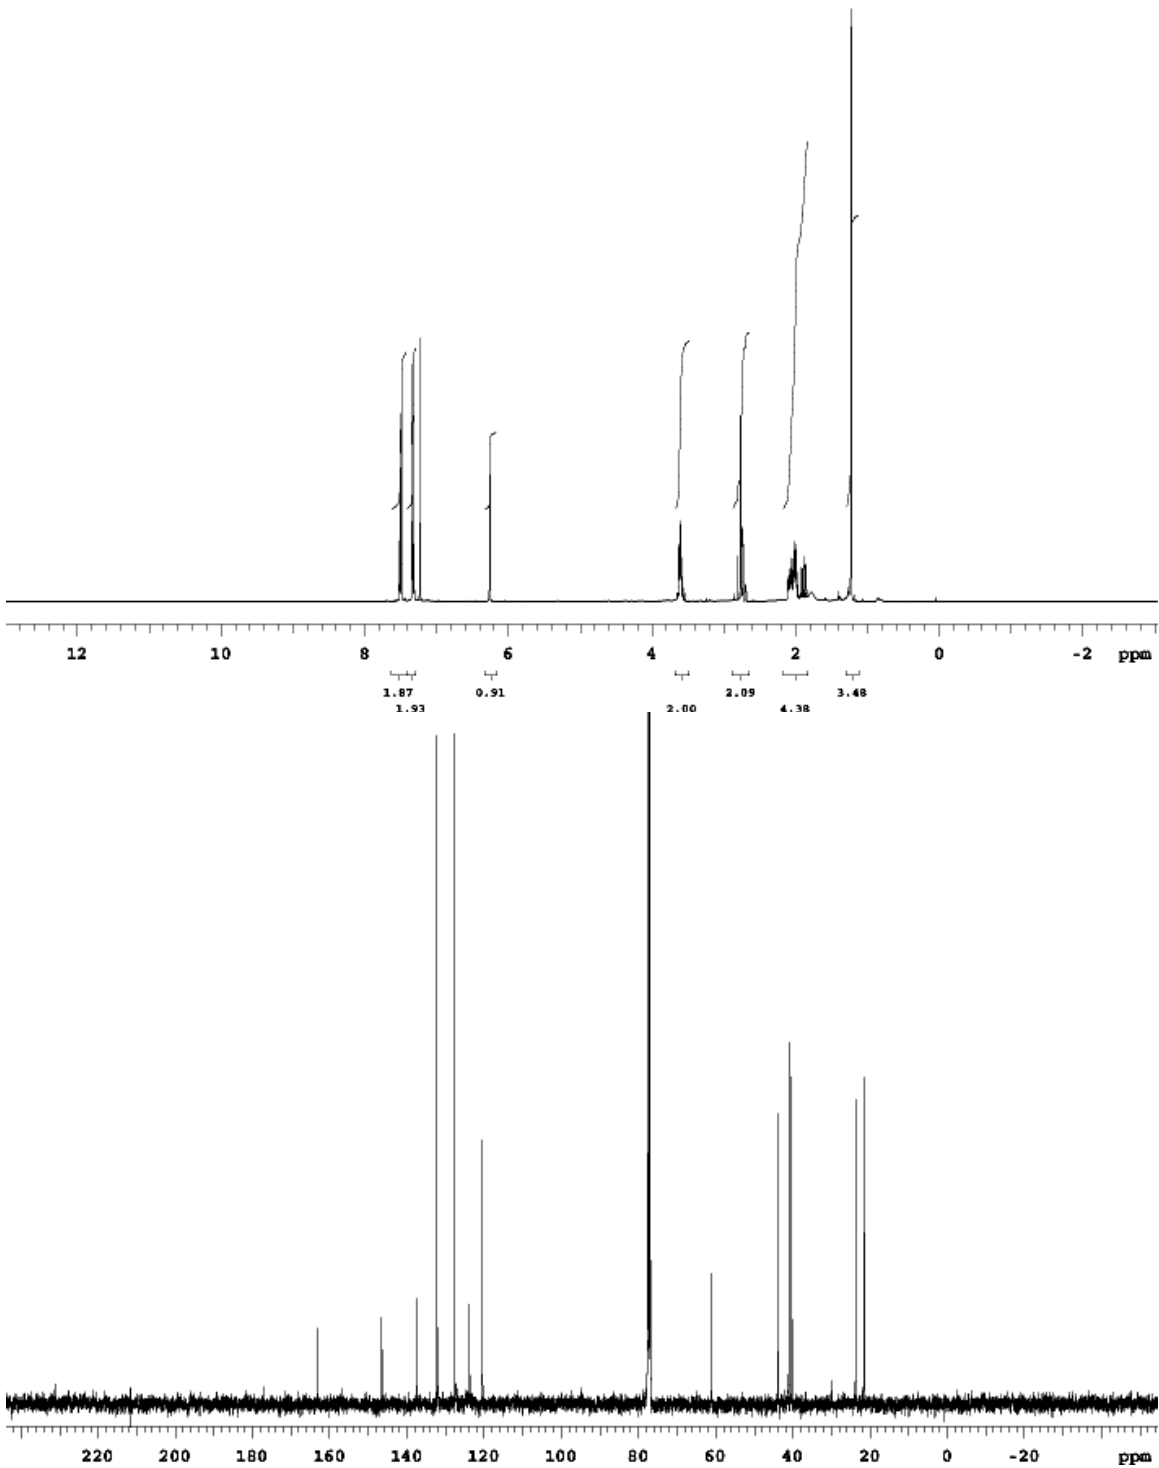

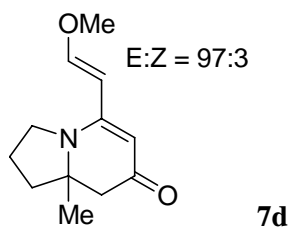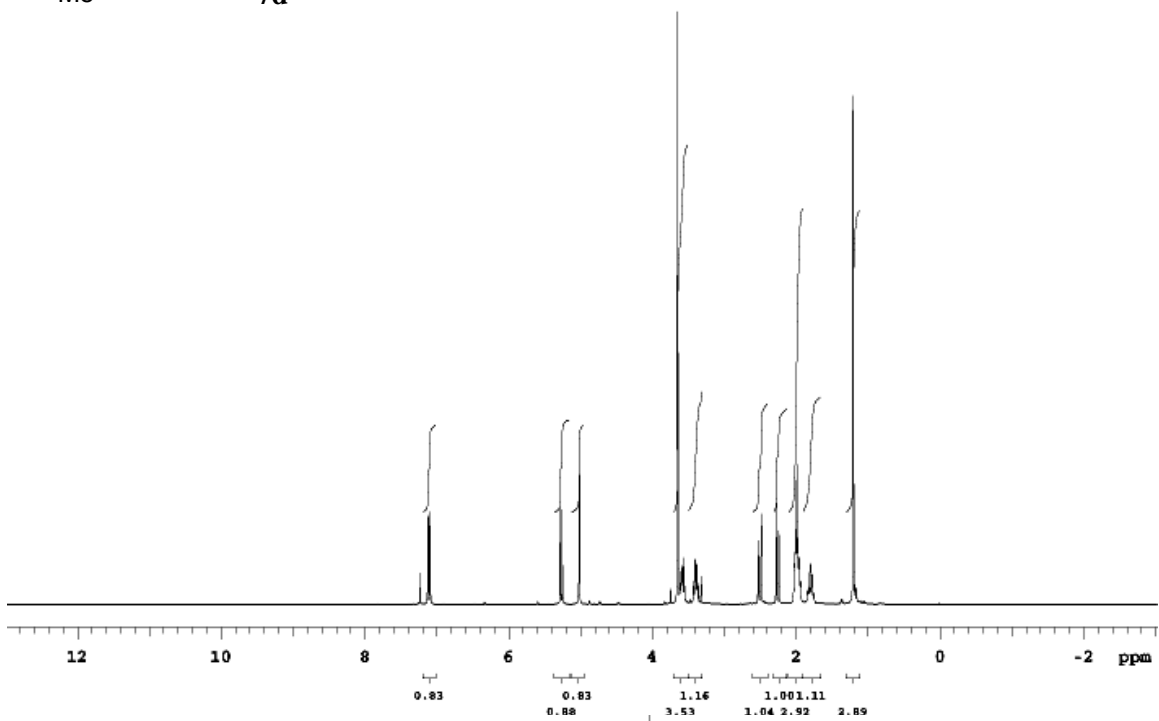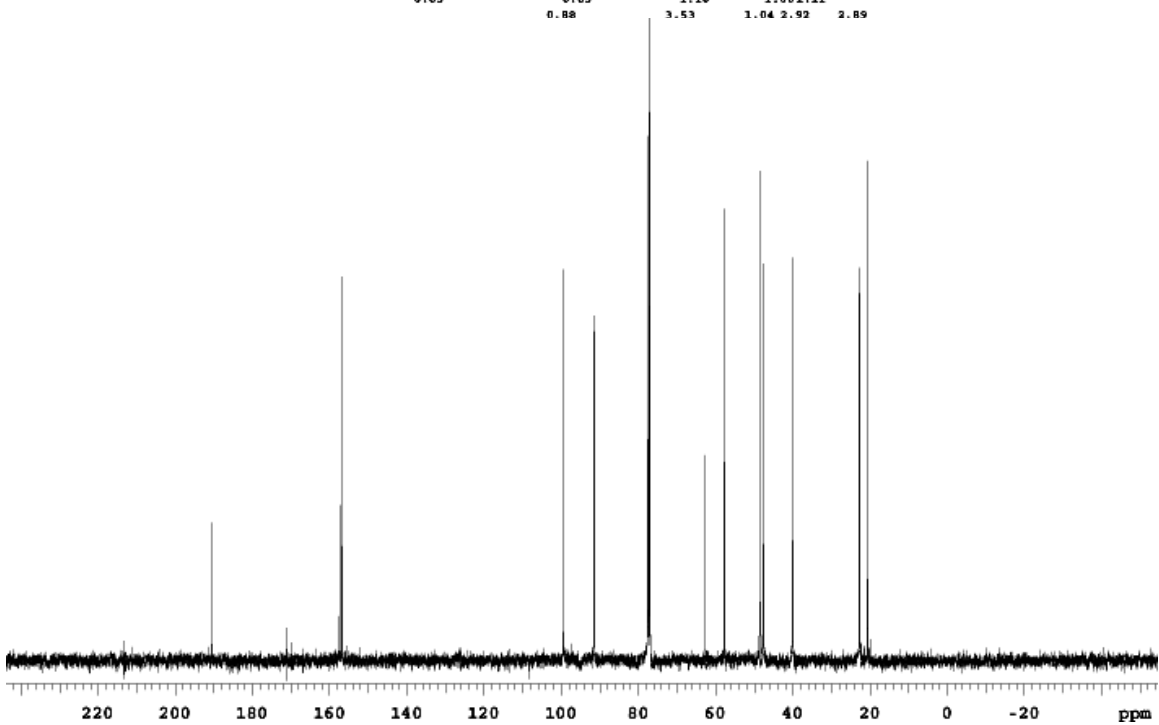

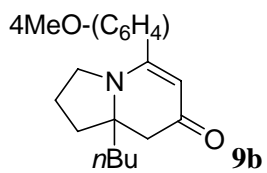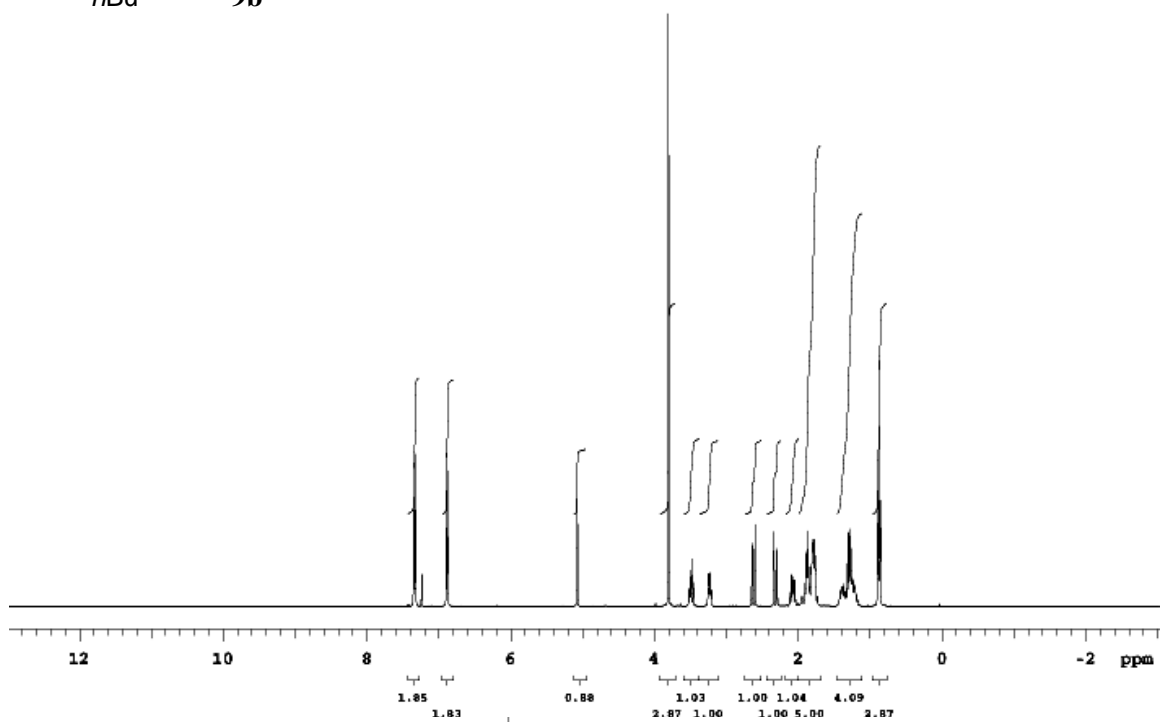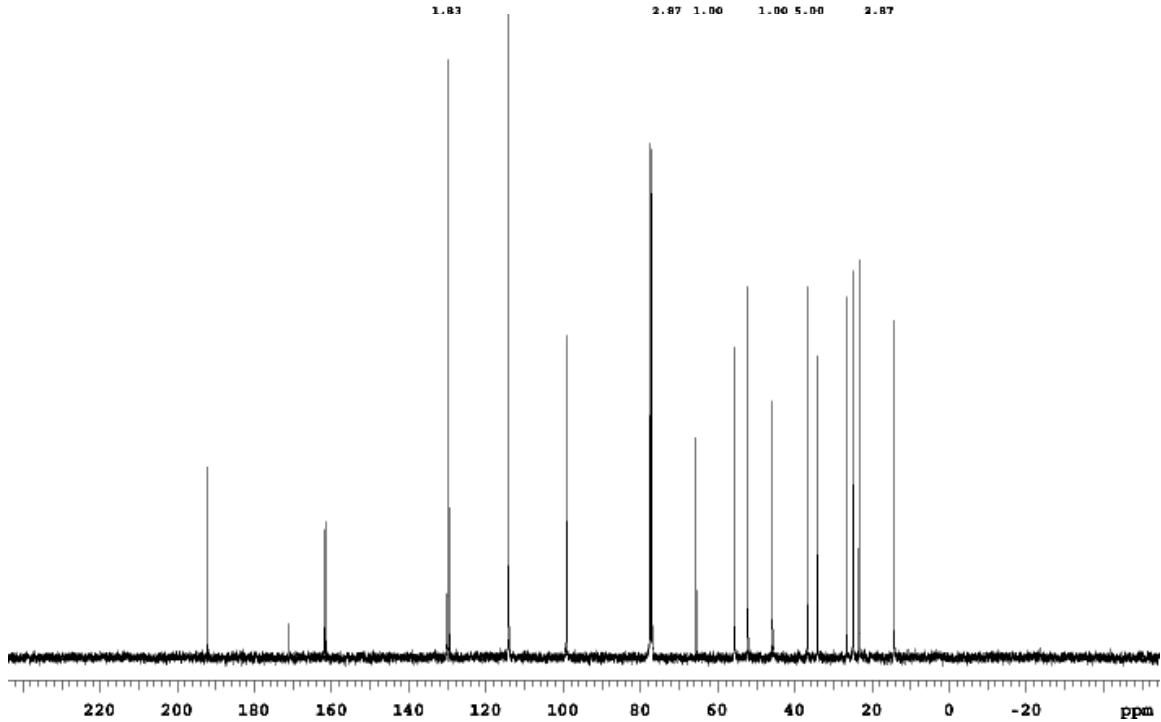



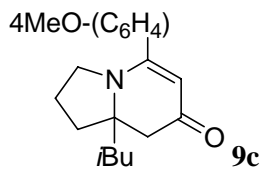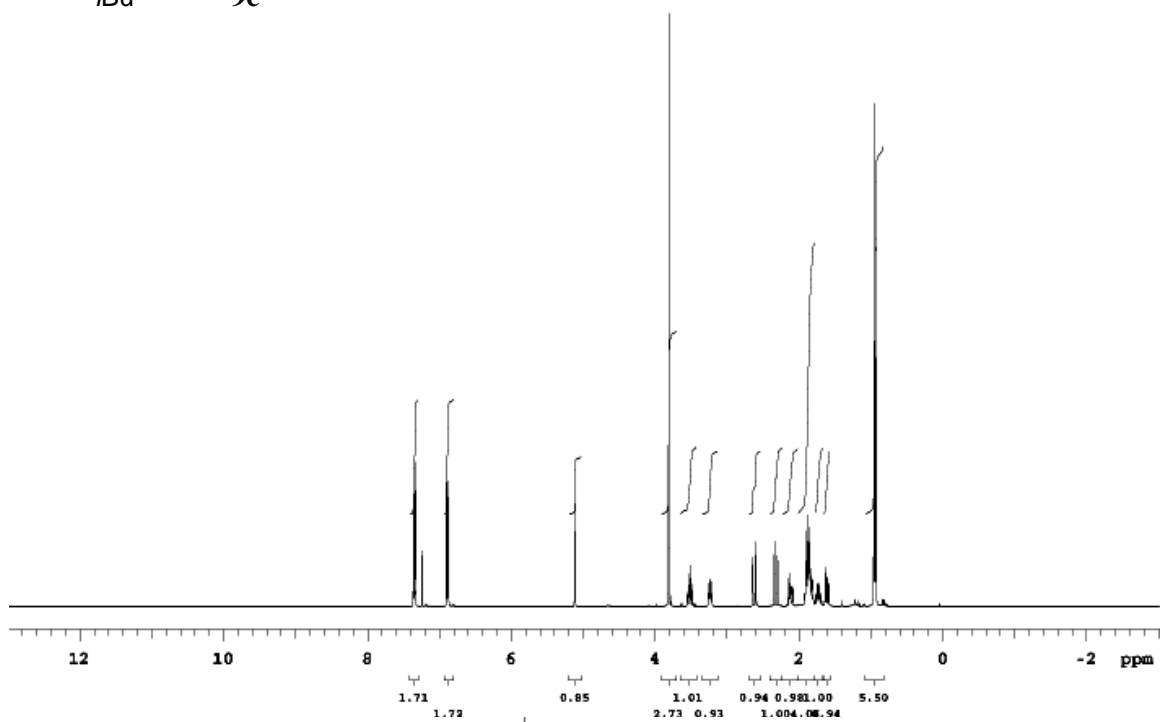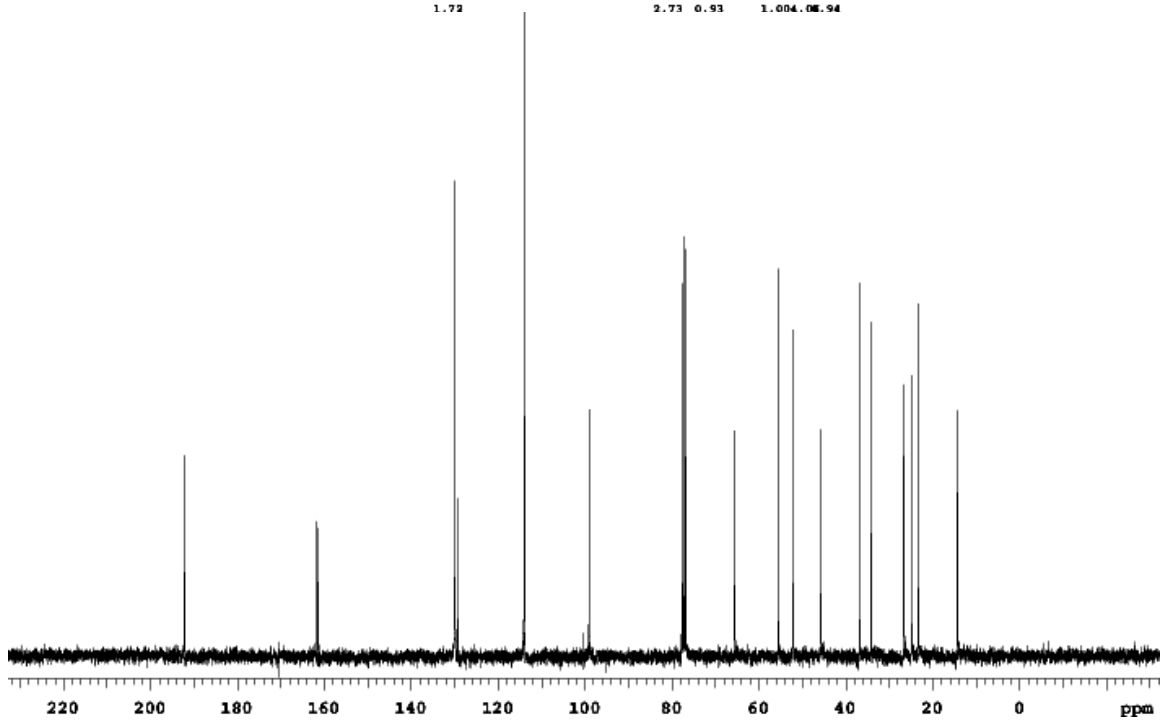

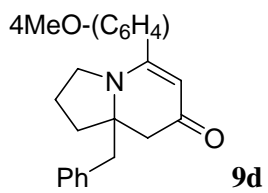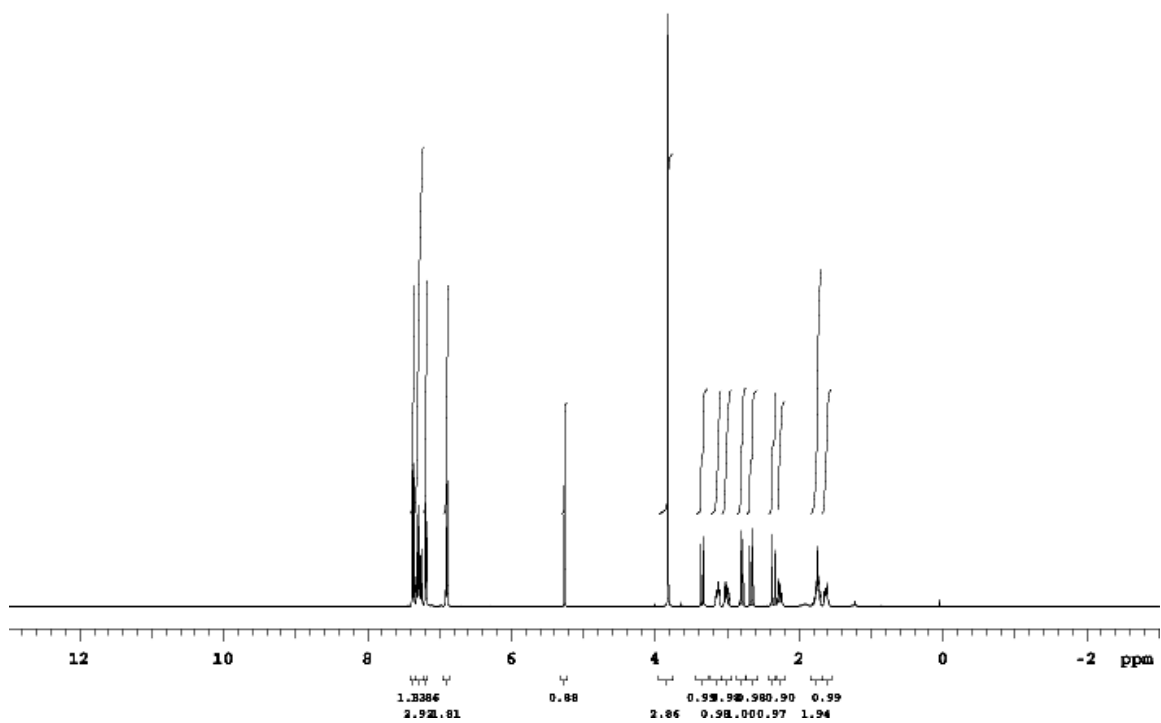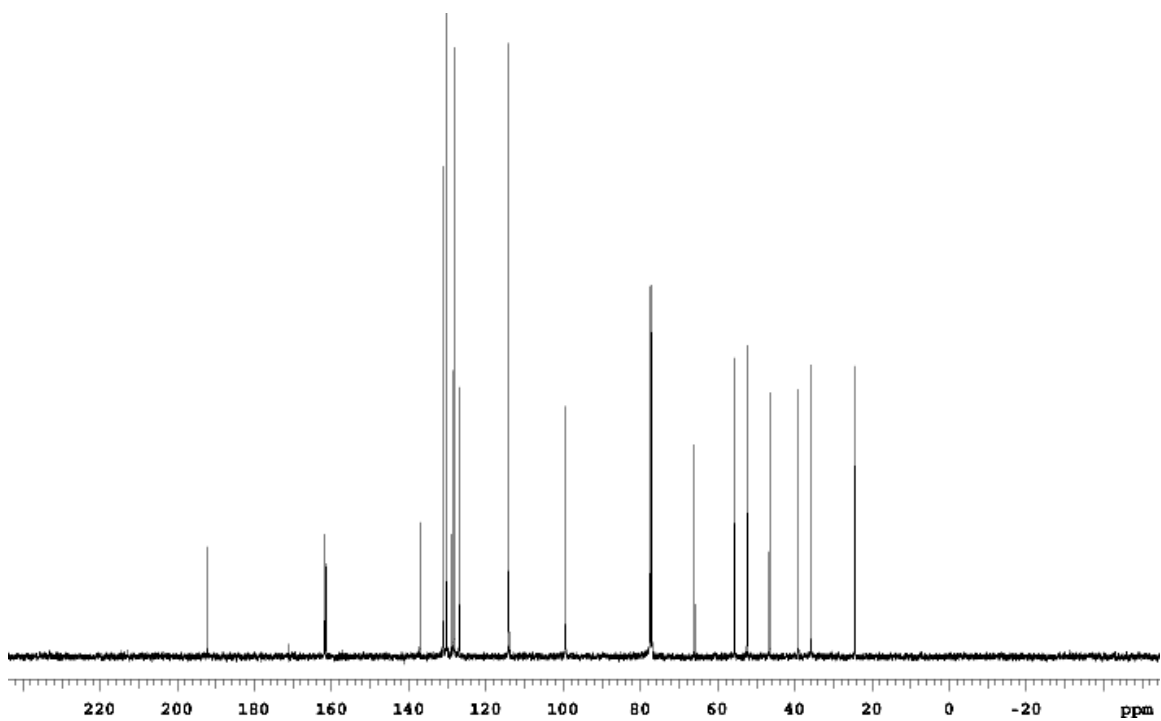

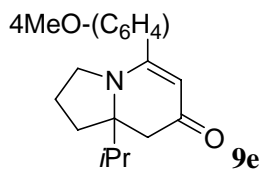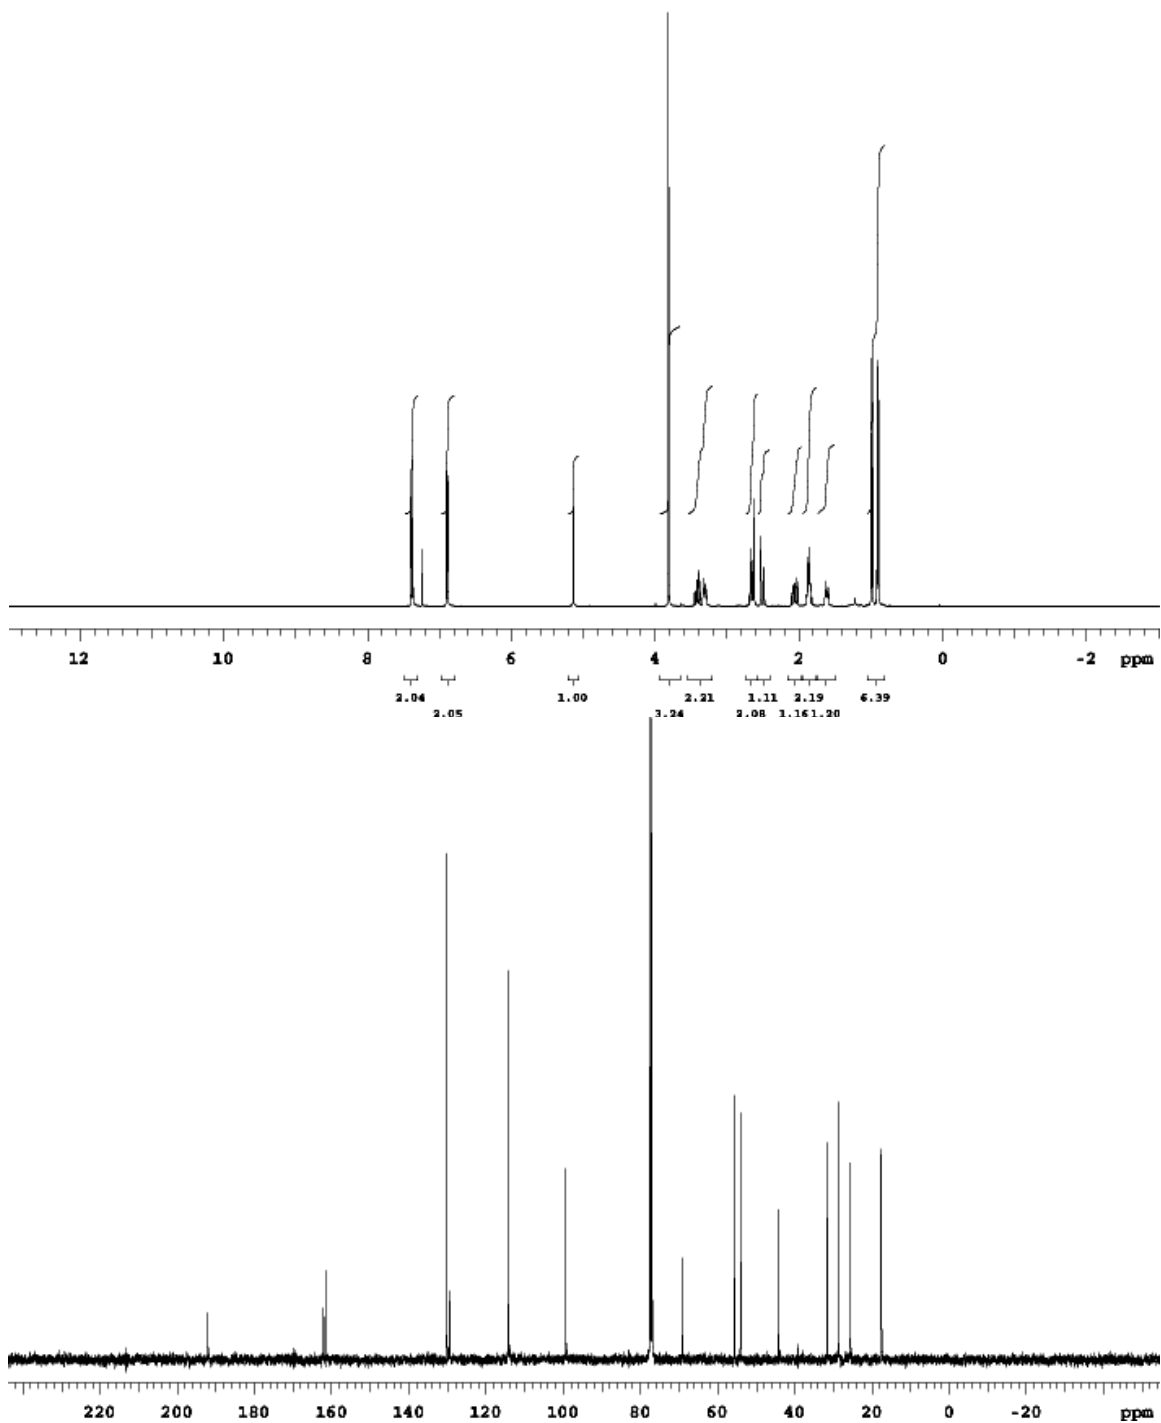

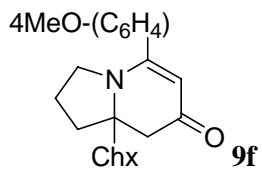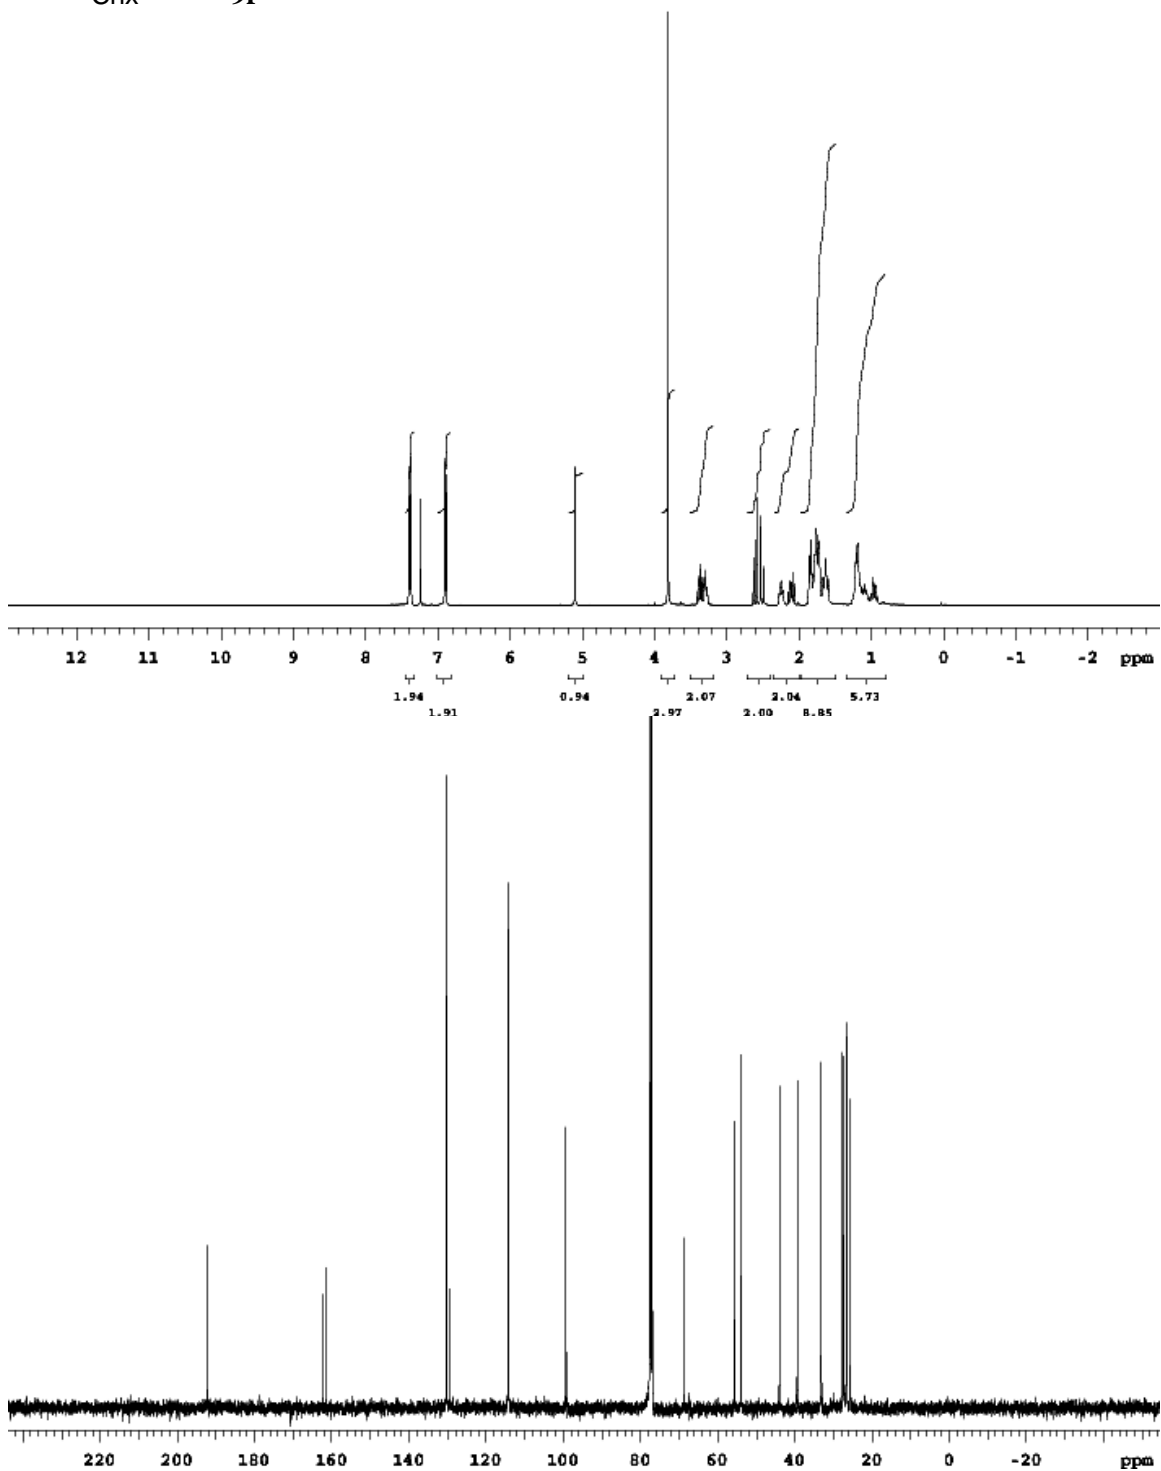

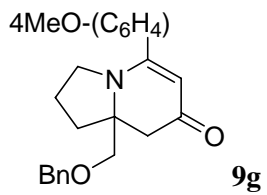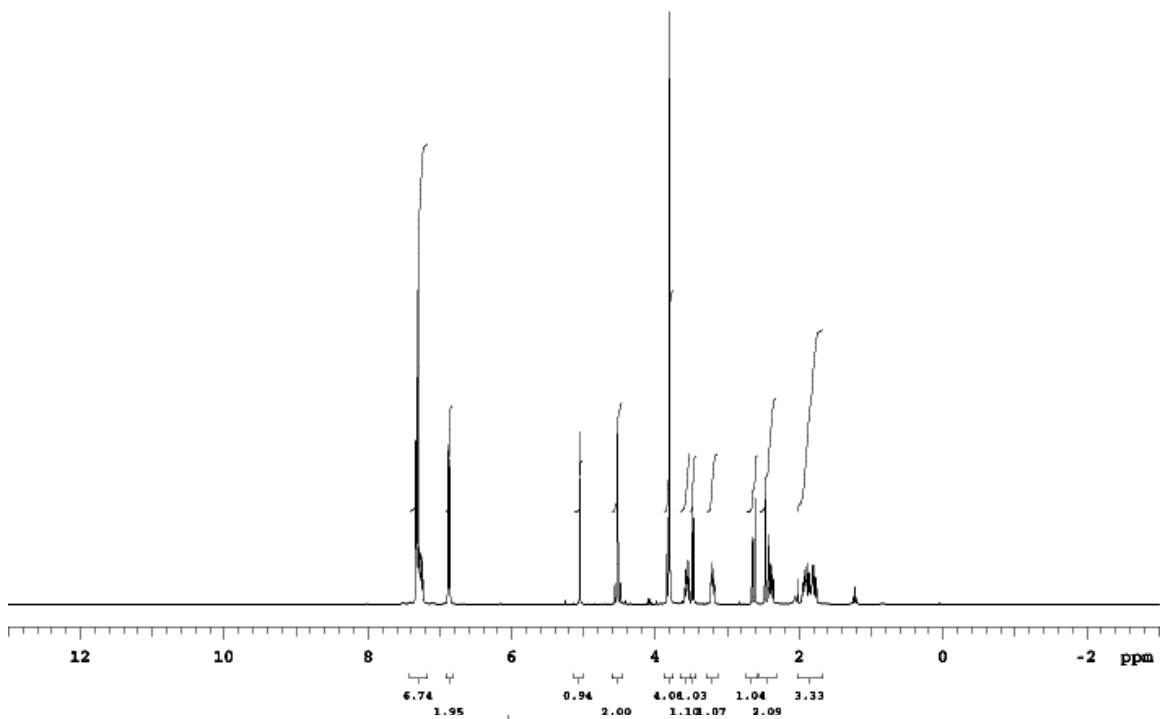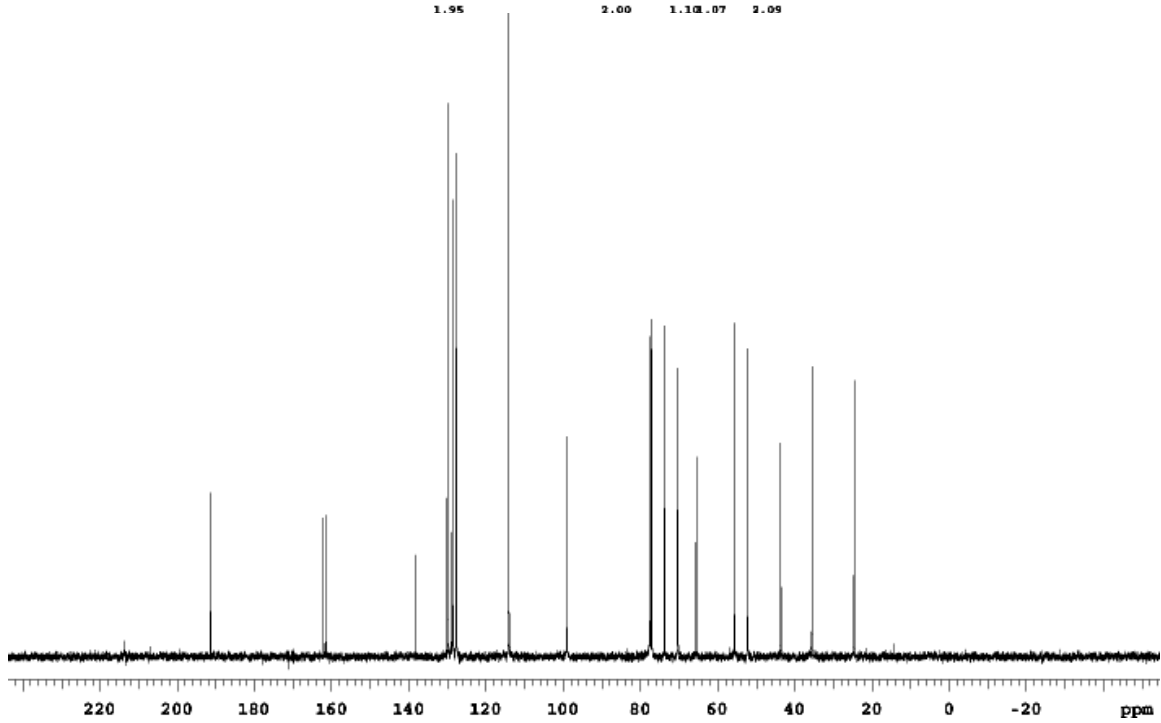

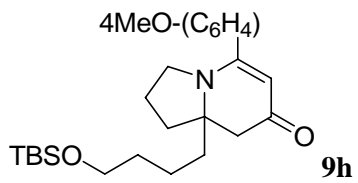

STANDARD IN OBSERVE

el\_1\_179

solvent: CDCl<sub>3</sub>

Ambient temperature

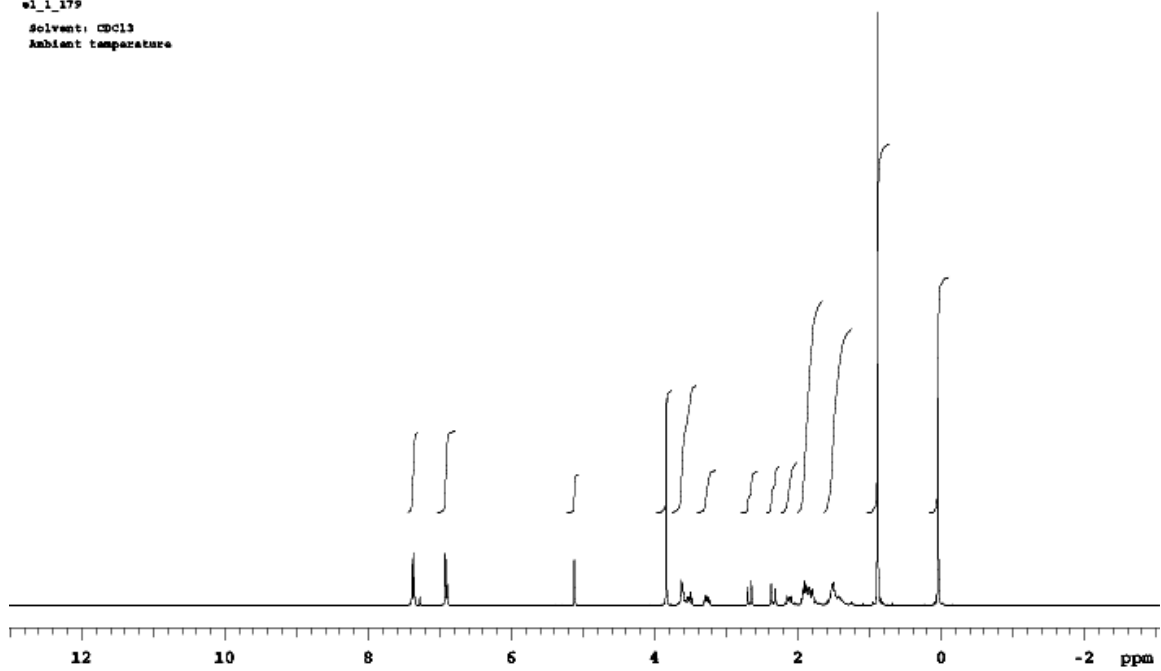

<sup>13</sup>C OBSERVE

solvent: CDCl<sub>3</sub>

Ambient temperature

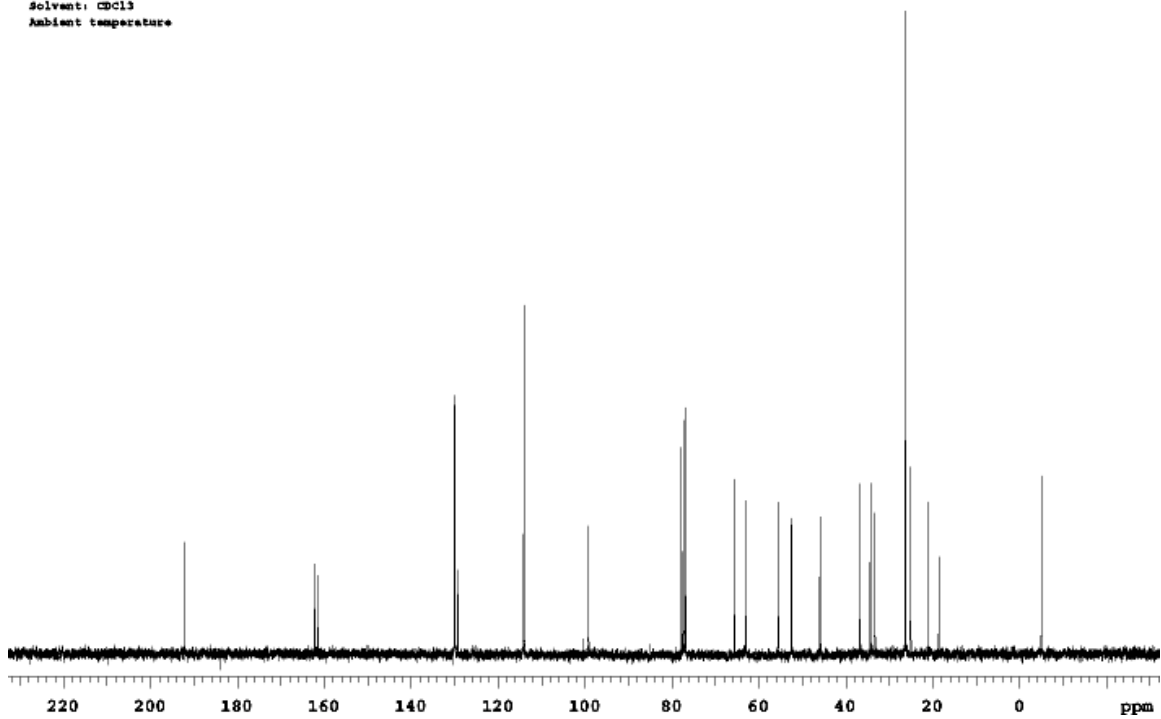

4MeO-(C<sub>6</sub>H<sub>4</sub>)

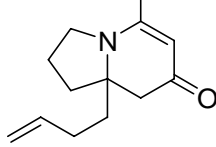

9i

STANDARD 1H OBSERVE

el\_i\_204

Solvent: CDCl<sub>3</sub>

Ambient temperature

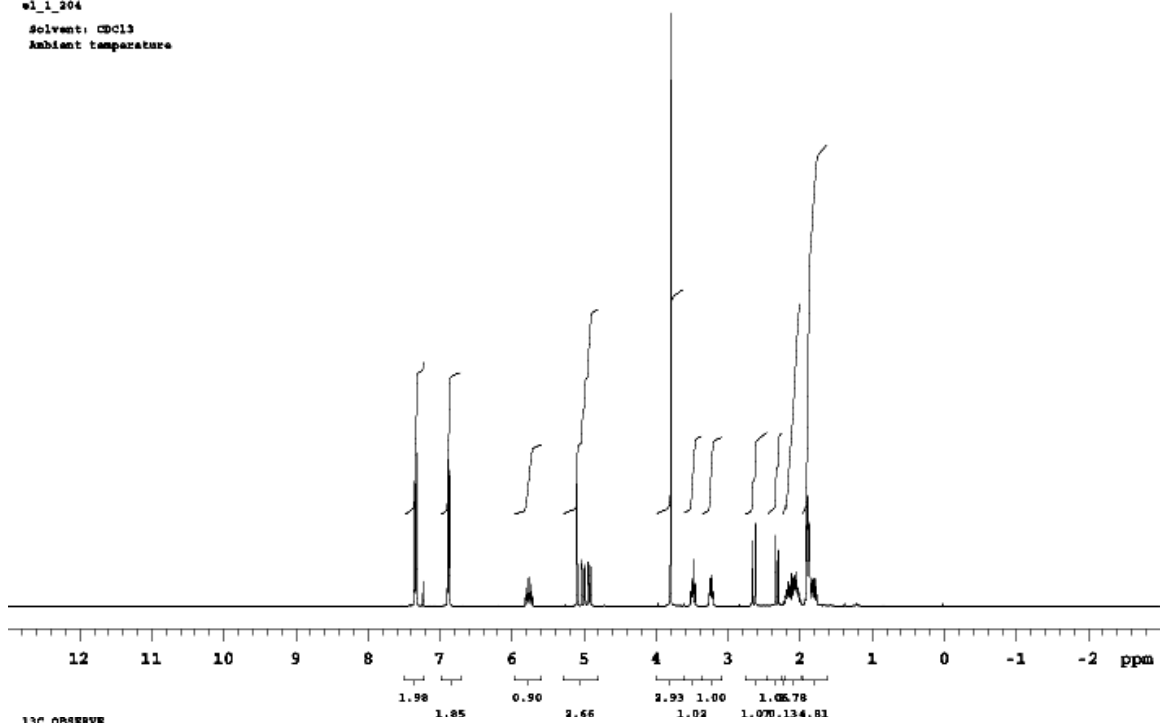

13C OBSERVE

el\_i\_204

Solvent: CDCl<sub>3</sub>

Ambient temperature

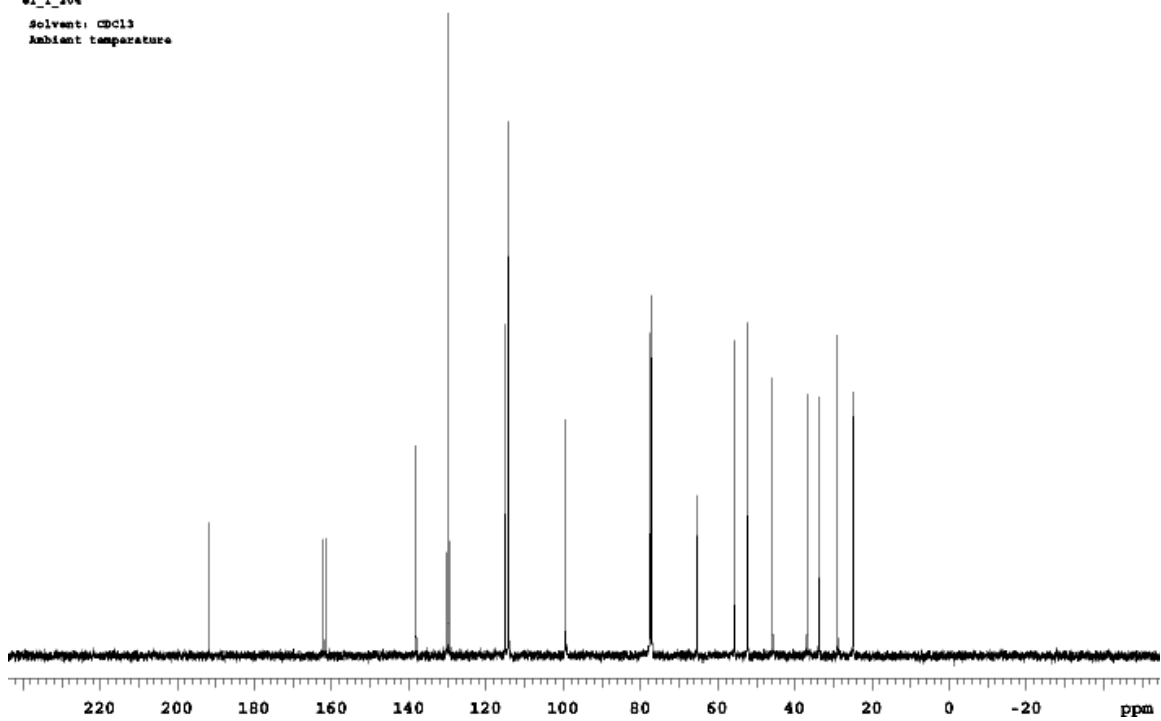

**1.10 General procedure for [2+2+2] cycloadditions with Alkyl Alkynes.**

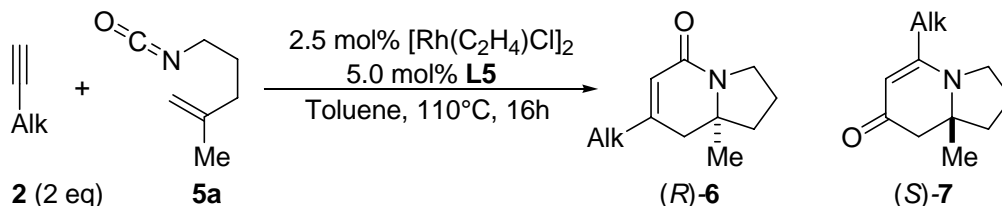

In a glovebox under  $\text{N}_2$  atmosphere, chlorobis(ethylene)rhodium(I) dimer (2.3 mg, 0.006 mmol) and piperidyl-(xylyl-TADDOL)-phosphoramidite **L5** (8.3 mg, 0.012 mmol) were transferred into a round bottom flask fitted with a reflux condenser. The system was sealed with a standard septum, removed from the glovebox and flushed with Ar. A solution of alkyne (0.48 mmol) and isocyanate **5a** (0.24 mmol) in toluene (7 mL) was then added. The brown-black solution was then heated to 110 °C (bath temperature), stirred at reflux for 16 hours under a static atmosphere of Ar, and cooled. The crude mixture was then concentrated and purified by silica gel, column chromatography.

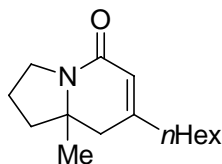

Flash Chromatography (Hexanes:EtOAc;1:3 to 1:8) yielded a clear syrup **6e** (76%) followed by a clear syrup **7h** (12%):

**(R)-7-Hexyl-8a-methyl-2,3,8,8a-tetrahydro-1H-indolizin-5-one (6e):** 91% ee by HPLC (Chiralcel ODH, Hex:*i*PrOH;85:15, 1 ml/min,  $\text{RT}_{\text{major}} = 5.2$  min,  $\text{RT}_{\text{minor}} = 5.7$  min);  $[\alpha]_{\text{D}} = +96.2^\circ$  ( $\text{CHCl}_3$ ,  $c=1.3$ );  $R_f = 0.35$  (100% EtOAc); IR (Thin Film)  $\nu$  2928, 2858, 1664, 1615, 1426, 1374, 1338  $\text{cm}^{-1}$ ;  $^1\text{H}$  NMR (400 MHz,  $\text{CDCl}_3$ )  $\delta$  5.67 (1H, m), 3.53-3.48 (2H, m), 2.33 (1H, d,  $J = 16.5$  Hz), 2.18 (1H, d,  $J = 16.5$  Hz), 2.15-2.08 (2H, m), 2.00-1.86 (3H, m), 1.80-1.72 (1H, m), 1.46-1.38 (2H, m), 1.30-1.20 (6H, m), 1.12 (3H, s), 0.84 (3H, t,  $J = 7.0$  Hz);  $^{13}\text{C}$  NMR (100 MHz,  $\text{CDCl}_3$ )  $\delta$  163.6, 152.3, 119.4, 60.8, 43.7, 41.7, 40.9, 36.9, 31.8, 29.0, 26.7, 23.5, 22.7, 21.6, 14.3; MS (EI)  $m/e$  (rel intensity) 236 (100), 234 (14), 220 (11), 178 (3), 154 (4), 149 (4), 136 (5); HRMS (ESI)  $m/e$  calcd ( $\text{M}^+$ ) 236.2014, found 236.2004.

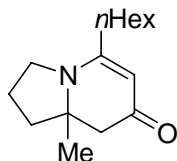

**(S)-5-Hexyl-8a-methyl-2,3,8,8a-tetrahydro-1H-indolizin-7-one (7e):** Flash Chromatography (Hexanes:EtOAc;1:8) yielded a clear syrup (12%); 56% ee by HPLC (Chiralcel ODH, Hex:*i*PrOH;85:15, 1 ml/min,  $\text{RT}_{\text{major}} = 7.5$  min,  $\text{RT}_{\text{minor}} = 8.4$  min);  $[\alpha]_{\text{D}} = +99.0^\circ$  ( $\text{CHCl}_3$ ,  $c=0.8$ );  $R_f = 0.15$  (100% EtOAc); IR (Thin Film)  $\nu$  2957, 2928, 2870, 1625, 1544, 1487, 1267, 1213,



1100  $\text{cm}^{-1}$ ;  $^1\text{H}$  NMR (400 MHz,  $\text{CDCl}_3$ )  $\delta$  4.89 (1H, s), 3.60-3.52 (1H, m), 3.47-3.39 (1H, m), 2.48 (1H, d,  $J = 16.0$  Hz), 2.28 (1H, d,  $J = 16.0$  Hz), 2.20-2.10 (2H, m), 2.08-1.94 (3H, m), 1.84-1.74 (1H, m), 1.52-1.40 (2H, m), 1.35-1.20 (6H, m), 1.17 (3H, s), 0.85 (3H, t,  $J = 7.0$  Hz);  $^{13}\text{C}$  NMR (100 MHz,  $\text{CDCl}_3$ )  $\delta$  191.1, 163.2, 96.2, 63.1, 48.0, 46.5, 39.7, 34.1, 31.7, 29.1, 27.3, 22.7, 22.4, 20.0, 14.2; MS (EI)  $m/e$  (rel intensity) 236 (100), 234 (15), 220 (12), 165 (14), 150 (8), 132 (16); HRMS (ESI)  $m/e$  calcd ( $\text{M}^+$ ) 236.2014, found 236.2011.

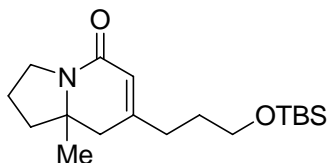

Flash Chromatography (Hex:EtOAc;1:2 to EtOAc 100%) yielded a brown syrup **6f** (63%) followed by a light yellow syrup **7i** (7%):

**(R)-7-[3-(tert-Butyl-dimethyl-silyloxy)-propyl]-8a-methyl-2,3,8,8a-tetrahydro-1H-indolizin-5-one (6f)**: 95% ee by HPLC (Chiralcel ODH, Hex:*i*PrOH;85:15, 1 ml/min,  $\text{RT}_{\text{major}} = 8.7$  min,  $\text{RT}_{\text{minor}} = 10.1$  min);  $[\alpha]_{\text{D}} = +90.0^\circ$  ( $\text{CHCl}_3$ ,  $c=0.8$ );  $R_f = 0.45$  (EtOAc 100%); IR (Thin Film)  $\nu$  2954, 2928, 2857, 1664, 1616, 1461, 1427, 1103, 835  $\text{cm}^{-1}$ ;  $^1\text{H}$  NMR (400 MHz,  $\text{CDCl}_3$ )  $\delta$  5.69 (1H, t,  $J = 1.0$  Hz), 3.59 (2H, t,  $J = 6.0$  Hz), 3.55-3.46 (2H, m), 2.36 (1H, d,  $J = 17.0$  Hz), 2.20 (1H, d,  $J = 17.0$  Hz), 2.20-2.15 (2H, m), 1.99-1.89 (3H, m), 1.75-1.63 (3H, m), 1.13 (3H, s), 0.85 (9H, s), 0.00 (6H, s);  $^{13}\text{C}$  NMR (100 MHz,  $\text{CDCl}_3$ )  $\delta$  163.5, 151.9, 119.4, 62.5, 60.8, 43.7, 41.9, 40.9, 33.3, 30.0, 26.1, 23.6, 21.6, 18.5, -5.1; HRMS (ESI)  $m/e$  calcd ( $\text{M}+\text{H}^+$ ) 324.2353, found 324.2350.

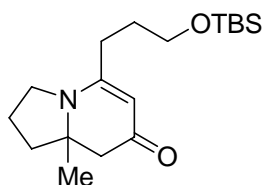

**(S)-5-[3-(tert-Butyl-dimethyl-silyloxy)-propyl]-8a-methyl-2,3,8,8a-tetrahydro-1H-indolizin-7-one (7f)**: 64% ee by HPLC (Chiralcel ODH, Hex:*i*PrOH;90:10, 1 ml/min,  $\text{RT}_{\text{major}} = 7.9$  min,  $\text{RT}_{\text{minor}} = 9.0$  min);  $[\alpha]_{\text{D}} = +74.0^\circ$  ( $\text{CHCl}_3$ ,  $c=0.4$ );  $R_f = 0.15$  (EtOAc 100%); IR (Thin Film)  $\nu$  2955, 2928, 1626, 1545, 1472, 1099  $\text{cm}^{-1}$ ;  $^1\text{H}$  NMR (400 MHz,  $\text{CDCl}_3$ )  $\delta$  4.88 (1H, s), 3.62 (2H, t,  $J = 6.0$  Hz), 3.62-2.56 (1H, m), 3.49-3.41 (1H, ddd,  $J = 10.0, 8.0, 8.0$  Hz), 2.48 (1H, d,  $J = 16.0$  Hz), 2.28 (1H, d,  $J = 16.0$  Hz), 2.26 (2H, ddd,  $J = 12.0, 7.5, 3.0$  Hz), 2.07-1.95 (3H, m), 1.84-1.75 (1H, m), 1.71-1.65 (2H, m), 1.18 (3H, s), 0.86 (9H, s), 0.02 (6H, s);  $^{13}\text{C}$  NMR (100 MHz,  $\text{CDCl}_3$ )  $\delta$  191.2, 162.9, 96.0, 63.1, 62.0, 48.0, 46.5, 39.7, 30.5, 30.4, 29.9, 26.1, 22.4, 20.0, -5.2; HRMS (ESI)  $m/e$  calcd ( $\text{M}^+$ ) 324.2353, found 324.2355.

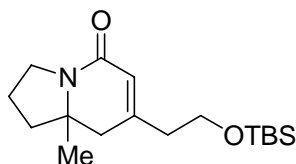

**(R)-7-[2-(tert-Butyl-dimethyl-silyloxy)-ethyl]-8a-methyl-2,3,8,8a-tetrahydro-1H-indolizin-5-one (6g)**: Flash Chromatography (Hexanes:EtOAc;1:5) yielded a light yellow syrup (77%); 93% ee by HPLC (Chiralcel ADH, Hex:*i*PrOH;90:10, 1 ml/min,  $\text{RT}_{\text{major}} = 5.9$  min,  $\text{RT}_{\text{minor}} = 5.2$  min);  $[\alpha]_{\text{D}} = +104.0^\circ$  ( $\text{CHCl}_3$ ,  $c=1.1$ );  $R_f = 0.48$  (EtOAc 100%); IR (Thin Film)  $\nu$  2955, 2928,

2857, 1664, 1616, 1427, 1255, 1096, 837  $\text{cm}^{-1}$ ;  $^1\text{H}$  NMR (400 MHz,  $\text{CDCl}_3$ )  $\delta$  5.71 (1H, d,  $J$  = 1.0 Hz), 3.73 (2H, t,  $J$  = 6.5 Hz), 3.55-3.50 (2H, m), 2.40-2.27 (4H, m), 2.00-1.89 (3H, m), 1.78-1.70 (1H, m), 1.14 (3H, s), 0.84 (9H, s), 0.02 (3H, s), 0.01 (3H, s);  $^{13}\text{C}$  NMR (100 MHz,  $\text{CDCl}_3$ )  $\delta$  163.4, 149.6, 121.0, 61.2, 60.9, 43.7, 42.0, 40.9, 40.6, 26.1, 23.6, 21.6, 18.4, -5.2; HRMS (ESI)  $m/e$  calcd ( $\text{M}^+$ ) 310.2197, found 310.2187.

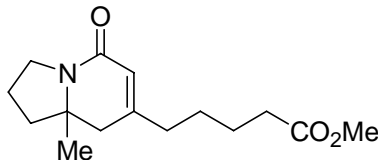

Flash Chromatography (Hexanes:EtOAc;1:5 then EtOAc 100%) yielded a light yellow syrup **6k** (74%) followed by a light yellow syrup **7h** (9%):

**(R)-5-(8a-Methyl-5-oxo-1,2,3,5,8,8a-hexahydro-indolizin-7-yl)-pentanoic acid methyl ester (6h):** 93% ee by HPLC (Chiralcel ODH, Hex:*i*PrOH;90:10, 1 ml/min,  $\text{RT}_{\text{major}}$  = 16.4 min,  $\text{RT}_{\text{minor}}$  = 18.0 min);  $[\alpha]_{\text{D}} = +111.0^\circ$  ( $\text{CHCl}_3$ ,  $c=0.9$ );  $R_f = 0.48$  (EtOAc 100%); IR (Thin Film)  $\nu$  2949, 2877, 1736, 1660, 1612, 1432  $\text{cm}^{-1}$ ;  $^1\text{H}$  NMR (400 MHz,  $\text{CDCl}_3$ )  $\delta$  5.68 (1H, s), 3.62 (3H, s), 3.53-3.47 (2H, m), 2.34 (1H, d,  $J$  = 17.0 Hz), 2.29 (2H, ddd,  $J$  = 7.0, 7.0, 4.0 Hz), 2.18 (1H, d,  $J$  = 17.0 Hz), 2.13 (2H, dd,  $J$  = 7.5, 7.5 Hz), 1.99-1.87 (3H, m), 1.78-1.73 (1H, m), 1.65-1.57 (2H, m), 1.52-1.44 (2H, m), 1.12 (3H, s);  $^{13}\text{C}$  NMR (100 MHz,  $\text{CDCl}_3$ )  $\delta$  174.0, 163.4, 151.4, 119.7, 60.8, 51.7, 43.7, 41.7, 40.9, 36.5, 33.9, 26.2, 24.6, 23.6, 21.5; HRMS (ESI)  $m/e$  calcd ( $\text{M}^+$ ) 266.1751, found 266.1764.

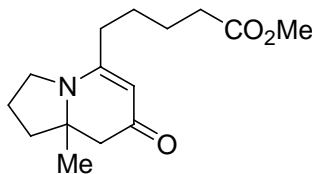

**(S)-5-(8a-Methyl-7-oxo-1,2,3,7,8,8a-hexahydro-indolizin-5-yl)-pentanoic acid methyl ester (7h):** 49% ee by HPLC (Chiralcel ADH, Hex:*i*PrOH;80:20, 1 ml/min,  $\text{RT}_{\text{major}}$  = 8.6 min,  $\text{RT}_{\text{minor}}$  = 8.1 min);  $[\alpha]_{\text{D}} = 49.0^\circ$  ( $\text{CHCl}_3$ ,  $c=0.5$ );  $R_f = 0.19$  (EtOAc 100%); IR (Thin Film)  $\nu$  2953, 2871, 1736, 1621, 1555, 1484, 1269, 1212, 1168  $\text{cm}^{-1}$ ;  $^1\text{H}$  NMR (400 MHz,  $\text{CDCl}_3$ )  $\delta$  4.87 (1H, s), 3.64 (3H, s), 3.55 (1H, ddd,  $J$  = 11.0, 8.0, 6.0 Hz), 3.42 (1H, ddd,  $J$  = 11.0, 8.0, 8.0 Hz), 2.46 (1H, d,  $J$  = 16.0 Hz), 2.31 (2H, t,  $J$  = 7.0 Hz), 2.28 (1H, d,  $J$  = 16.0 Hz), 2.24-2.14 (2H, m), 2.06-1.95 (3H, m), 1.83-1.74 (1H, m), 1.70-1.62 (2H, m), 1.57-1.49 (2H, m), 1.17 (3H, s);  $^{13}\text{C}$  NMR (100 MHz,  $\text{CDCl}_3$ )  $\delta$  191.4, 173.9, 162.2, 96.2, 63.2, 51.8, 48.1, 46.5, 39.7, 33.8, 33.7, 26.7, 24.7, 22.5, 20.0; HRMS (ESI)  $m/e$  calcd ( $\text{M}+\text{H}^+$ ) 266.1751, found 266.1739.

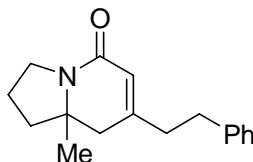

**(R)-8a-Methyl-7-phenethyl-2,3,8,8a-tetrahydro-1H-indolizin-5-one (6i):** Flash Chromatography (Hexanes:EtOAc;1:4) yielded a light yellow syrup (71%); 95% ee by HPLC (Chiralcel ADH, Hex:*i*PrOH;90:10, 1 ml/min,  $\text{RT}_{\text{major}}$  = 12.9 min,  $\text{RT}_{\text{minor}}$  = 10.4 min);  $[\alpha]_{\text{D}} = +110.0^\circ$  ( $\text{CHCl}_3$ ,  $c=0.8$ );  $R_f = 0.44$  (EtOAc 100%); IR (Thin Film)  $\nu$  2967, 2925, 2881, 1661, 1613, 1429  $\text{cm}^{-1}$ ;  $^1\text{H}$  NMR (400 MHz,  $\text{CDCl}_3$ )  $\delta$  7.28-7.23 (2H, m), 7.19-7.15 (3H, m), 5.75 (1H,

bs), 3.55-3.50 (2H, m), 2.78 (2H, ddd,  $J = 9.0, 9.0, 4.5$  Hz), 2.45 (2H, td,  $J = 9.0, 1.0$  Hz), 2.38 (1H, d,  $J = 16.0$  Hz), 2.24 (1H, d,  $J = 16.0$  Hz), 2.00-1.88 (3H, m), 1.81-1.70 (1H, m), 1.12 (3H, s);  $^{13}\text{C}$  NMR (100 MHz,  $\text{CDCl}_3$ )  $\delta$  163.4, 151.3, 141.0, 128.7, 128.4, 126.4, 119.8, 60.9, 43.7, 41.9, 40.9, 38.4, 33.2, 23.6, 21.5; HRMS (ESI)  $m/e$  calcd ( $\text{M}+\text{H}^+$ ) 256.1696, found 256.1696.

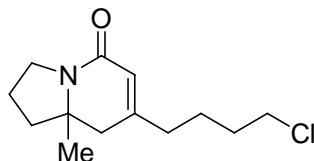

**(R)-7-(4-Chloro-butyl)-8a-methyl-2,3,8,8a-tetrahydro-1H-indolizin-5-one (6j):** Flash Chromatography (Hex:EtOAc;1:2) yielded a yellowish syrup (60%); 92% ee by HPLC (Chiralcel ODH, Hex:*i*PrOH;85:15, 1 ml/min,  $\text{RT}_{\text{major}} = 8.7$  min,  $\text{RT}_{\text{minor}} = 10.1$  min);  $[\alpha]_{\text{D}} = +106.0^{\circ}$  ( $\text{CHCl}_3$ ,  $c=0.53$ );  $R_f = 0.52$  (EtOAc 100%); IR (Thin Film)  $\nu$  2967, 1660, 1605, 1433  $\text{cm}^{-1}$ ;  $^1\text{H}$  NMR (400 MHz,  $\text{CDCl}_3$ )  $\delta$  5.71 (1H, t,  $J = 1.0$  Hz), 3.58-3.47 (4H, m), 2.36 (1H, d,  $J = 17.0$  Hz), 2.21 (1H, d,  $J = 17.0$  Hz), 2.17 (2H, t,  $J = 7.5$  Hz), 2.01-1.89 (2H, m), 1.82-1.73 (4H, m), 1.66-1.57 (2H, m), 1.14 (3H, s);  $^{13}\text{C}$  NMR (100 MHz,  $\text{CDCl}_3$ )  $\delta$  163.4, 151.2, 119.9, 60.8, 44.8, 43.7, 41.6, 40.9, 36.0, 32.0, 23.9, 23.6, 21.6; HRMS (ESI)  $m/e$  calcd ( $\text{M}+\text{H}^+$ ) 242.1306, found 242.1308.

### I.11 $^1\text{H}$ and $^{13}\text{C}$ NMR Spectra for [2+2+2] Products from Alkyl Alkynes

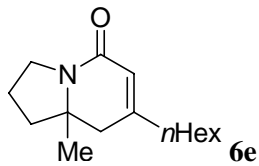

STANDARD IS OBSERVE

el\_1\_161\_1

solvent: CDCl<sub>3</sub>

Ambient temperature

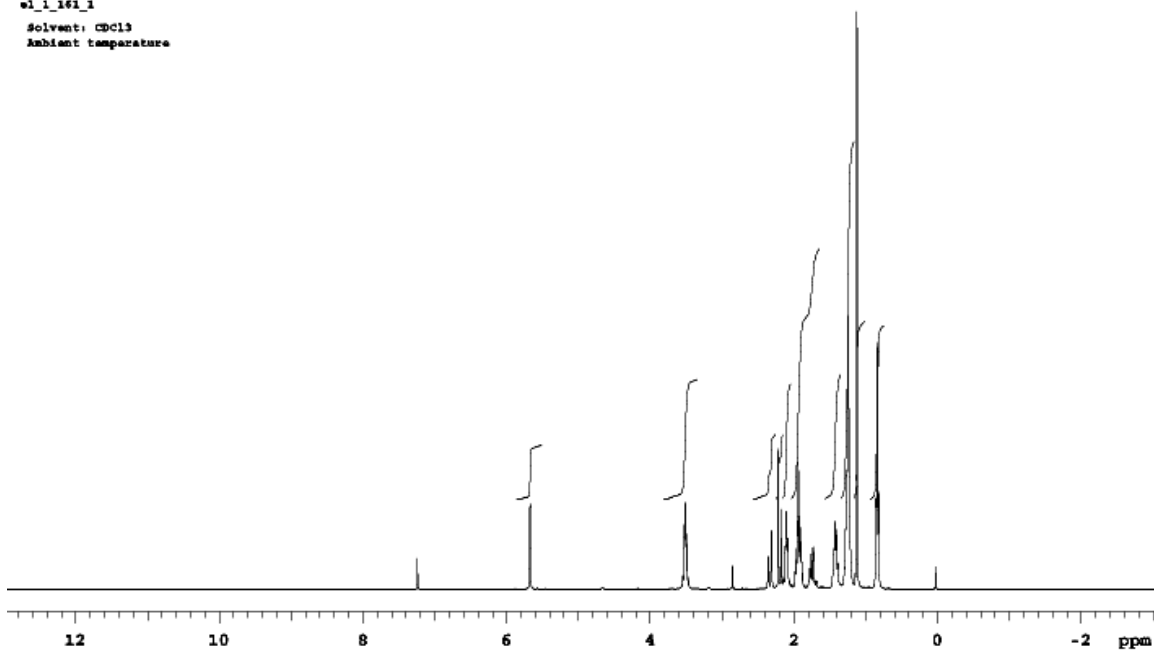

$^{13}\text{C}$  OBSERVE

el\_1\_161\_1

solvent: CDCl<sub>3</sub>

Ambient temperature

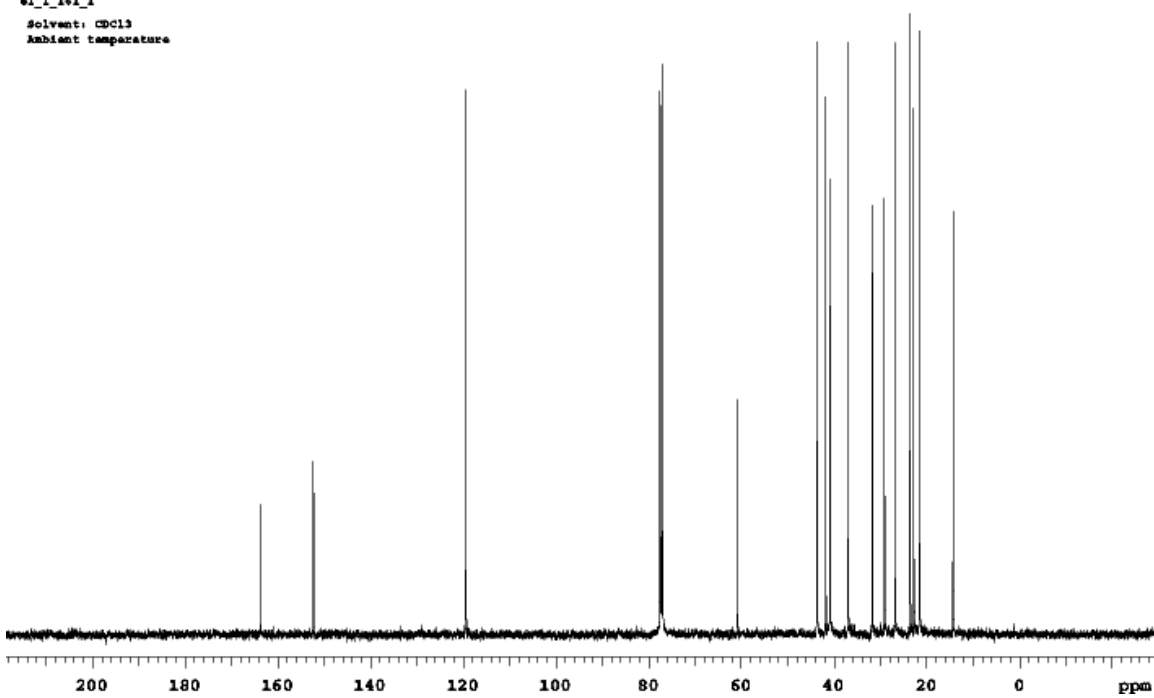

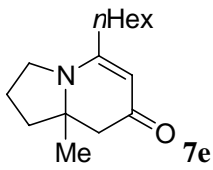

STANDARD 1H OBSERVE

Solvent: CDCl3  
Ambient temperature

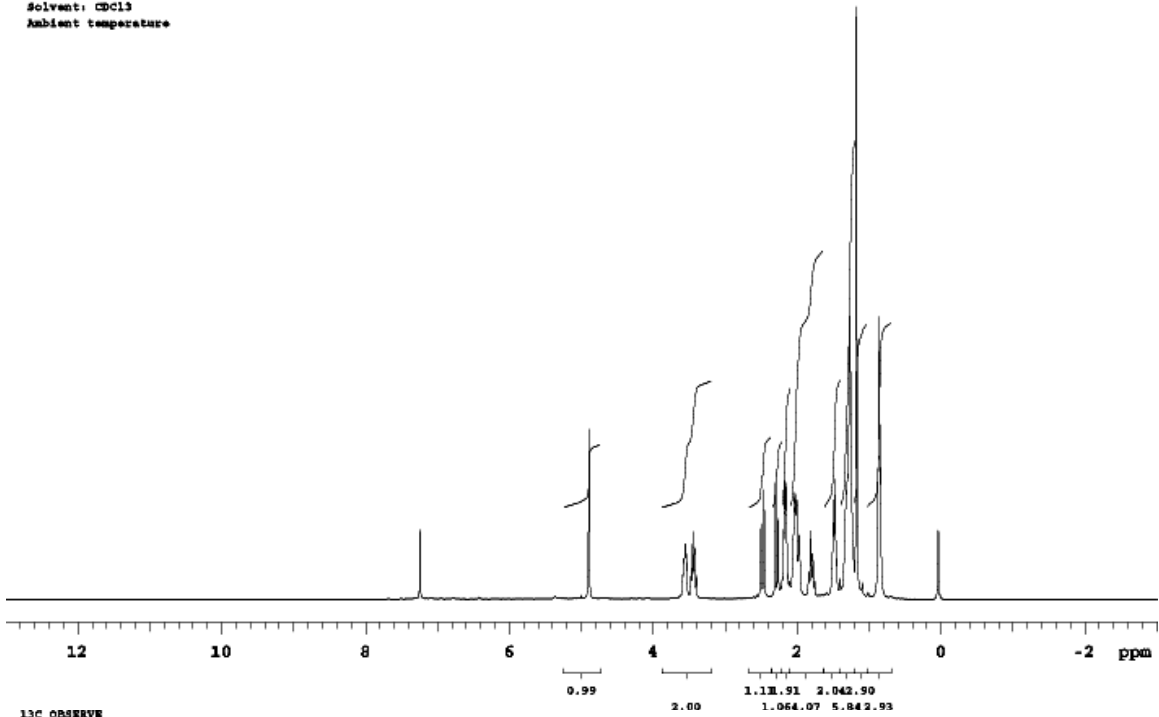

13C OBSERVE

el\_1\_161\_2  
Solvent: CDCl3  
Ambient temperature

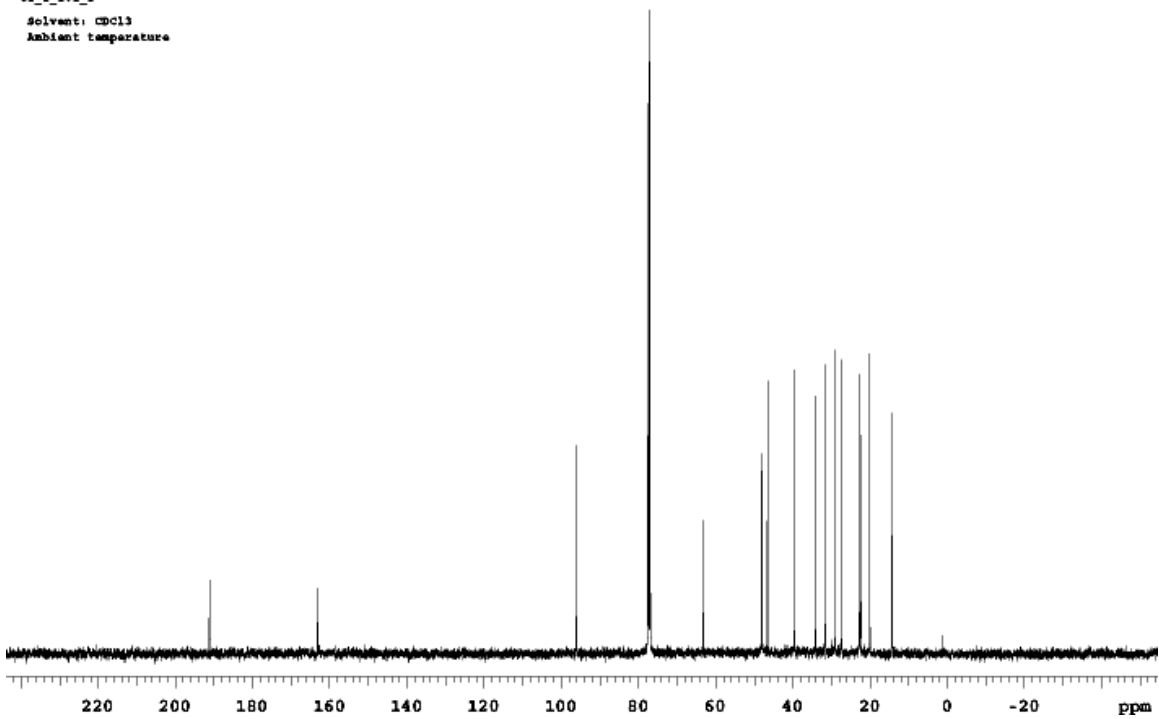

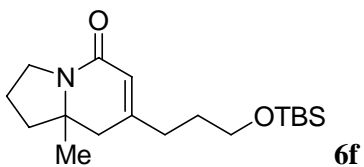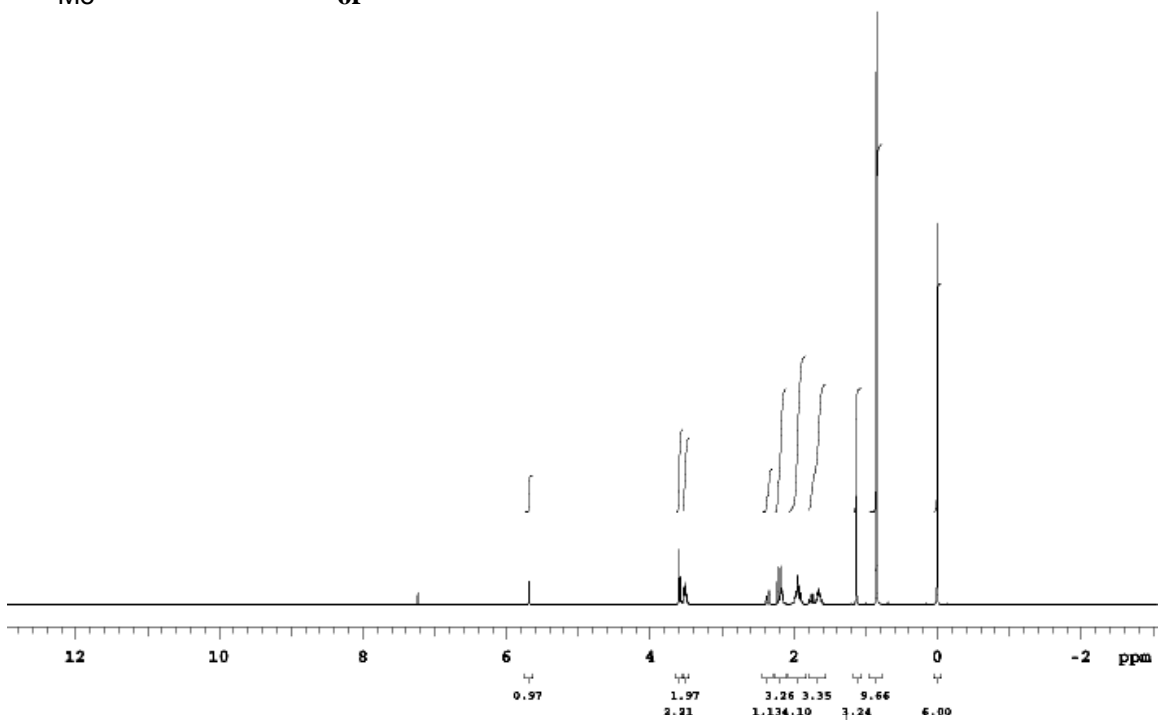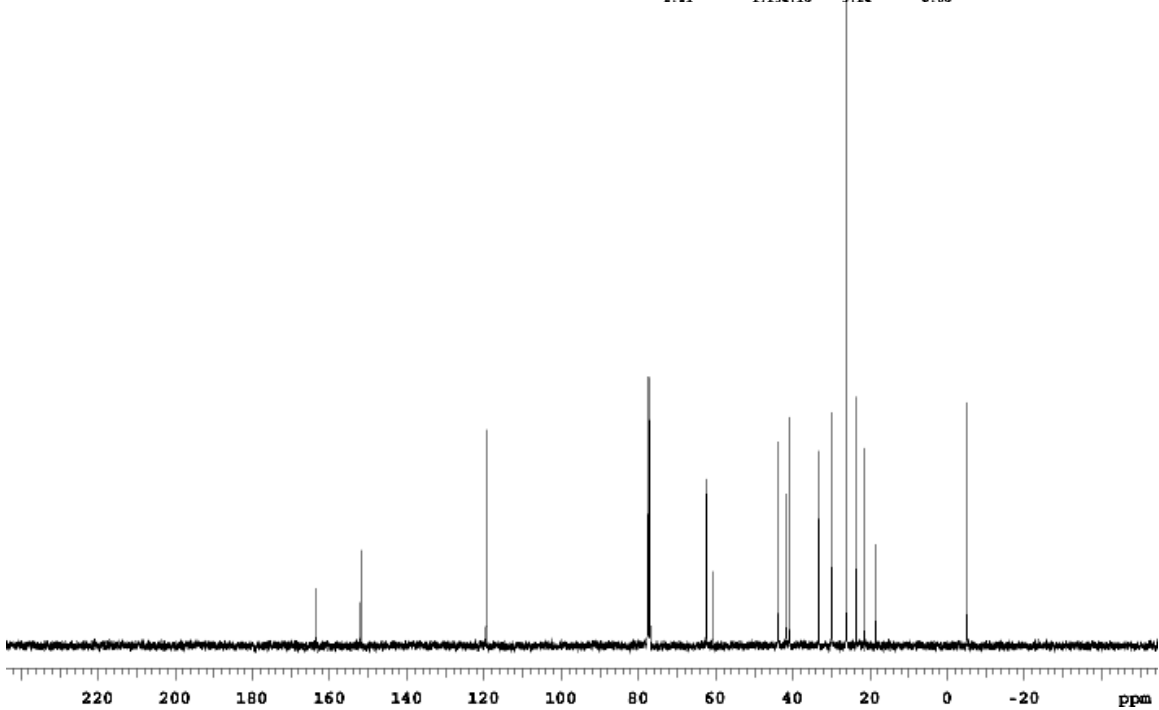

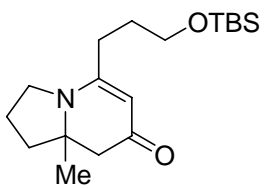

7f

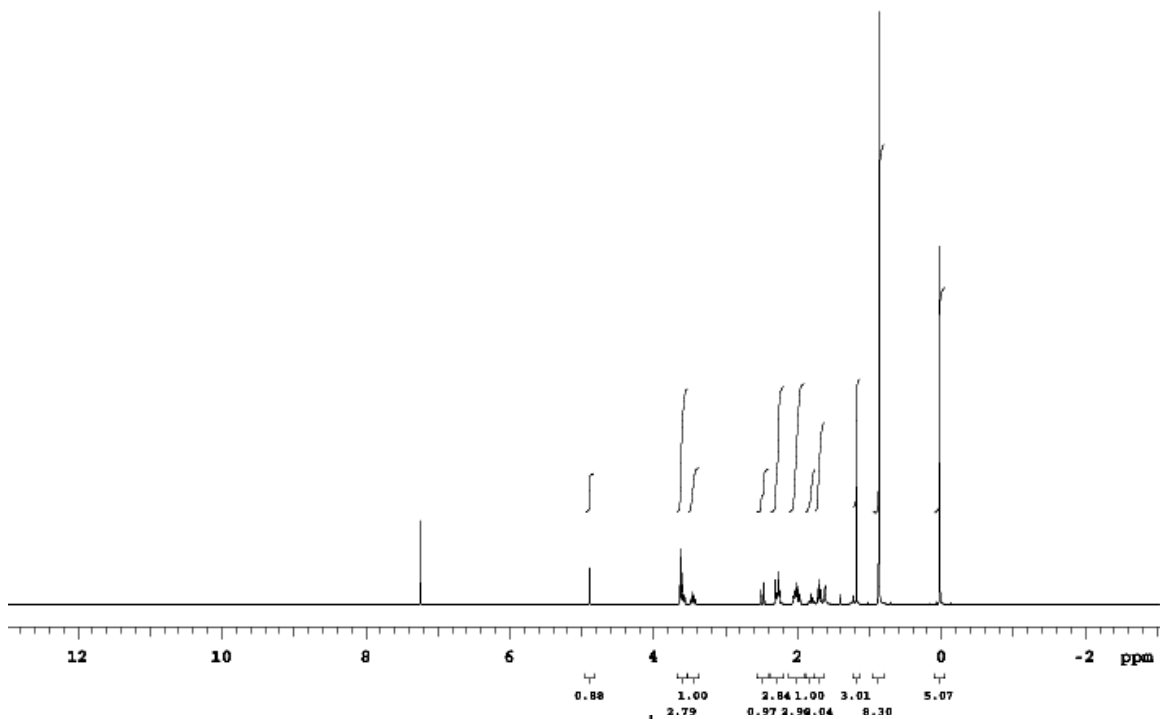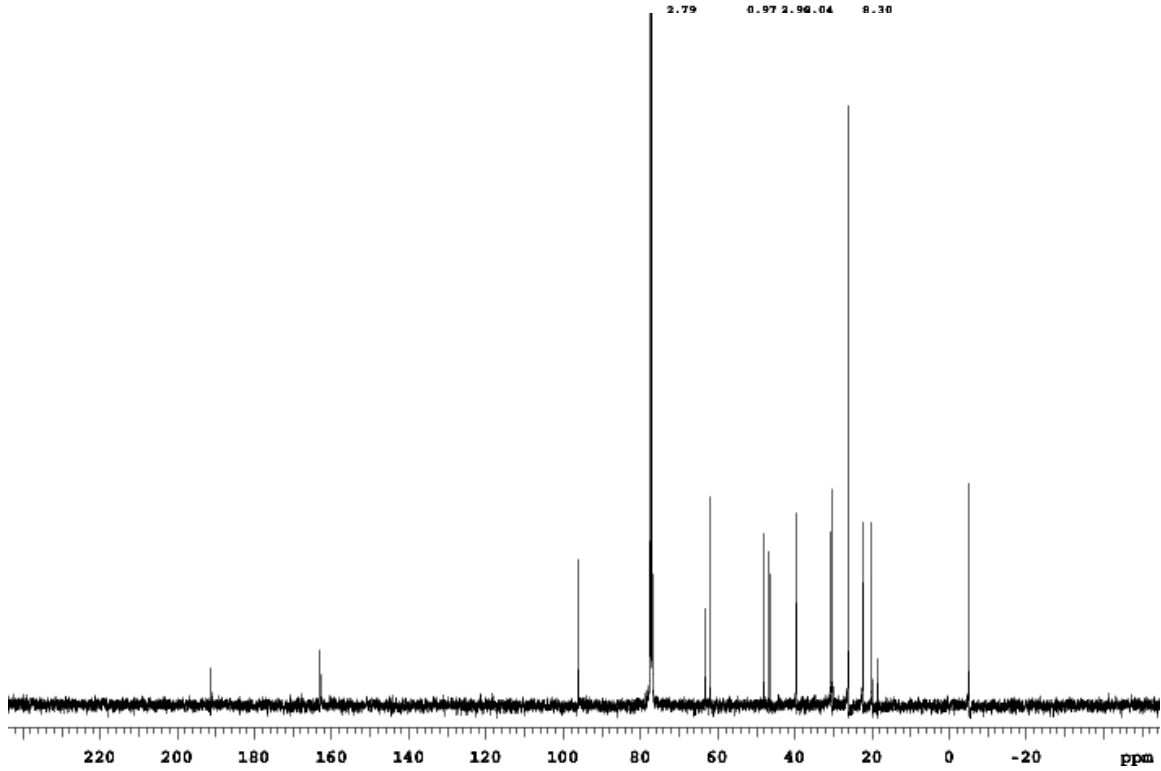

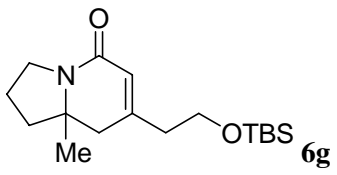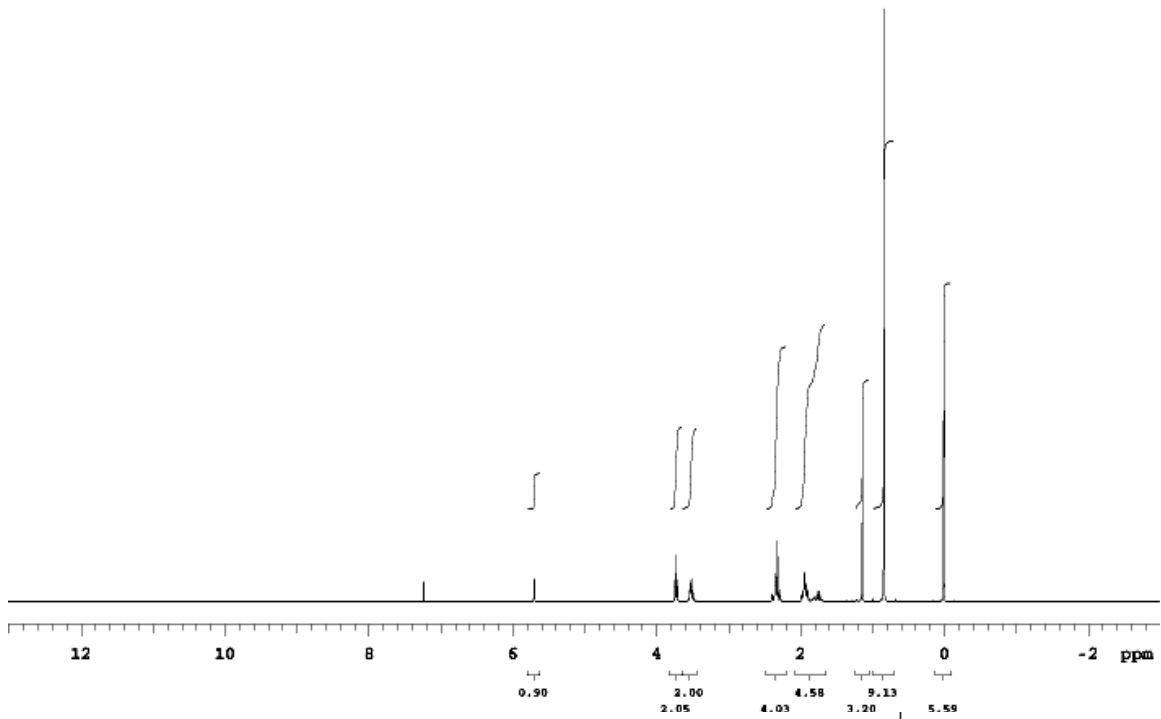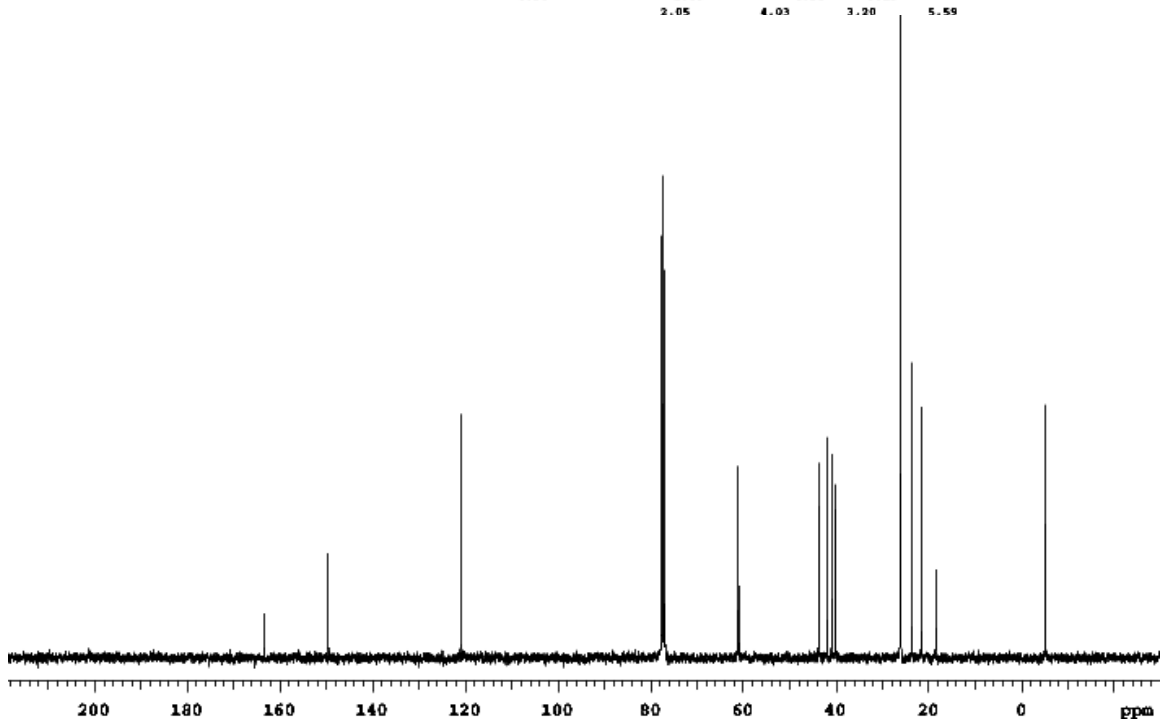



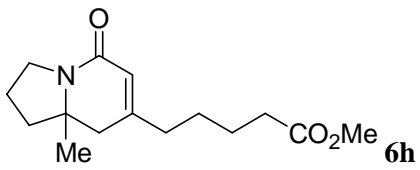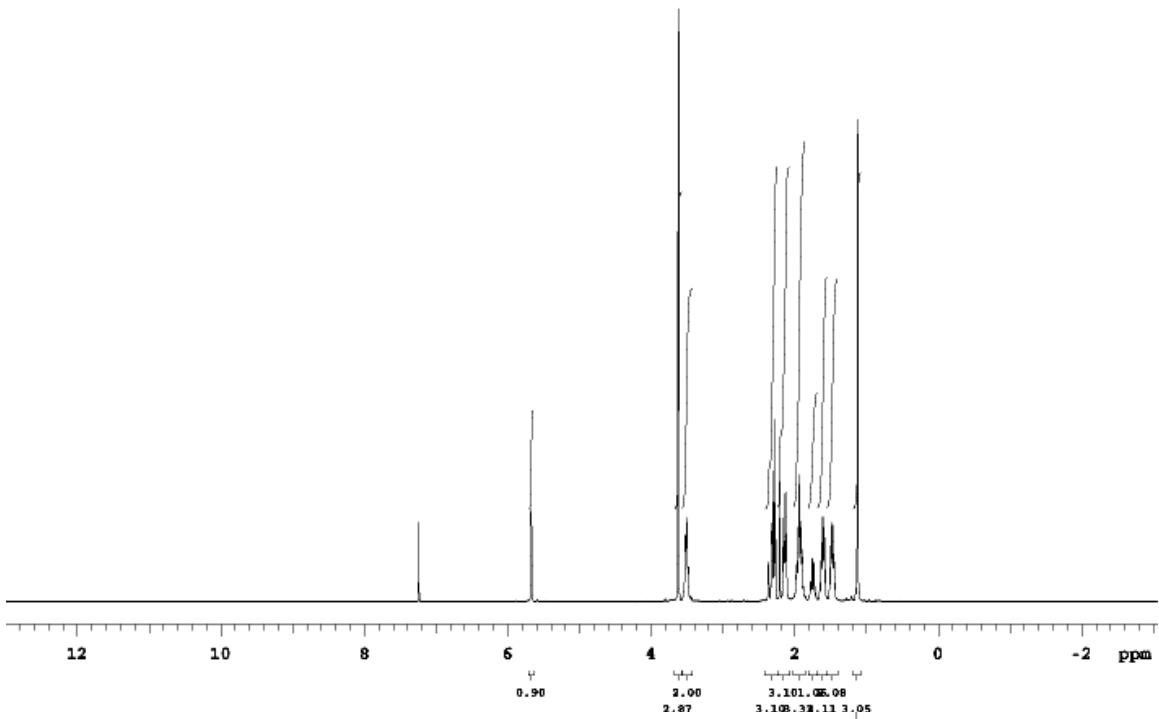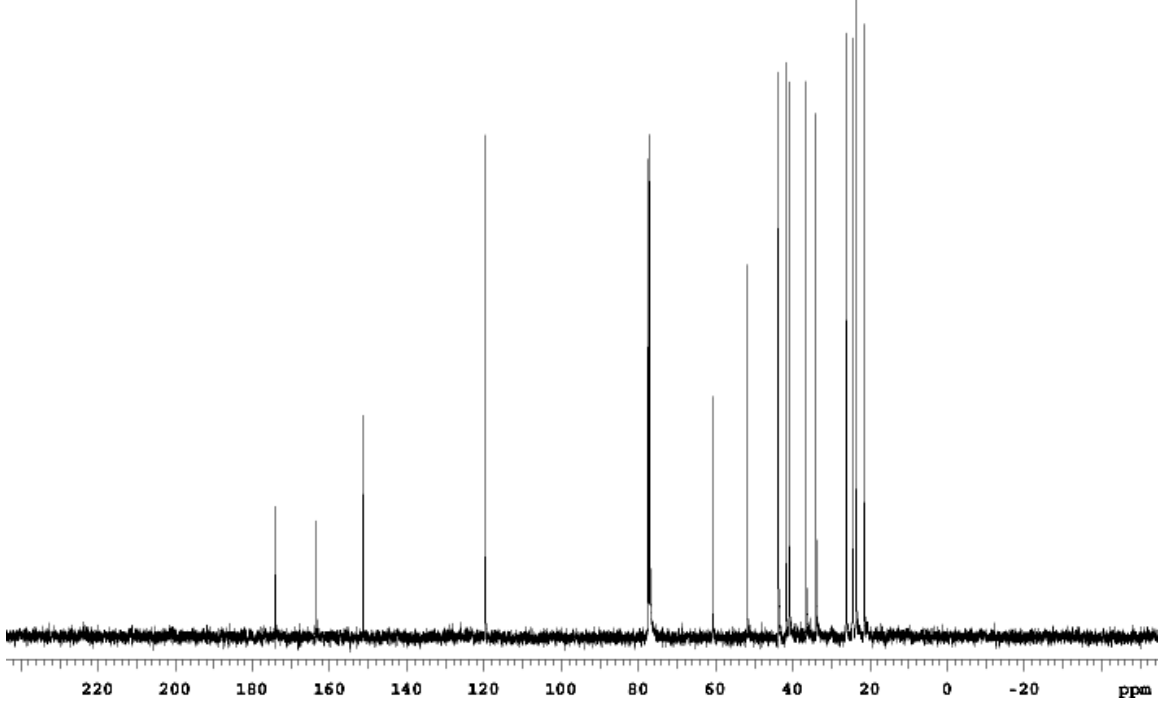

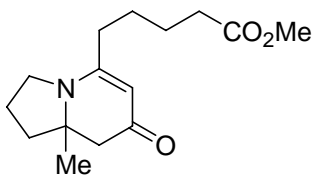

7h

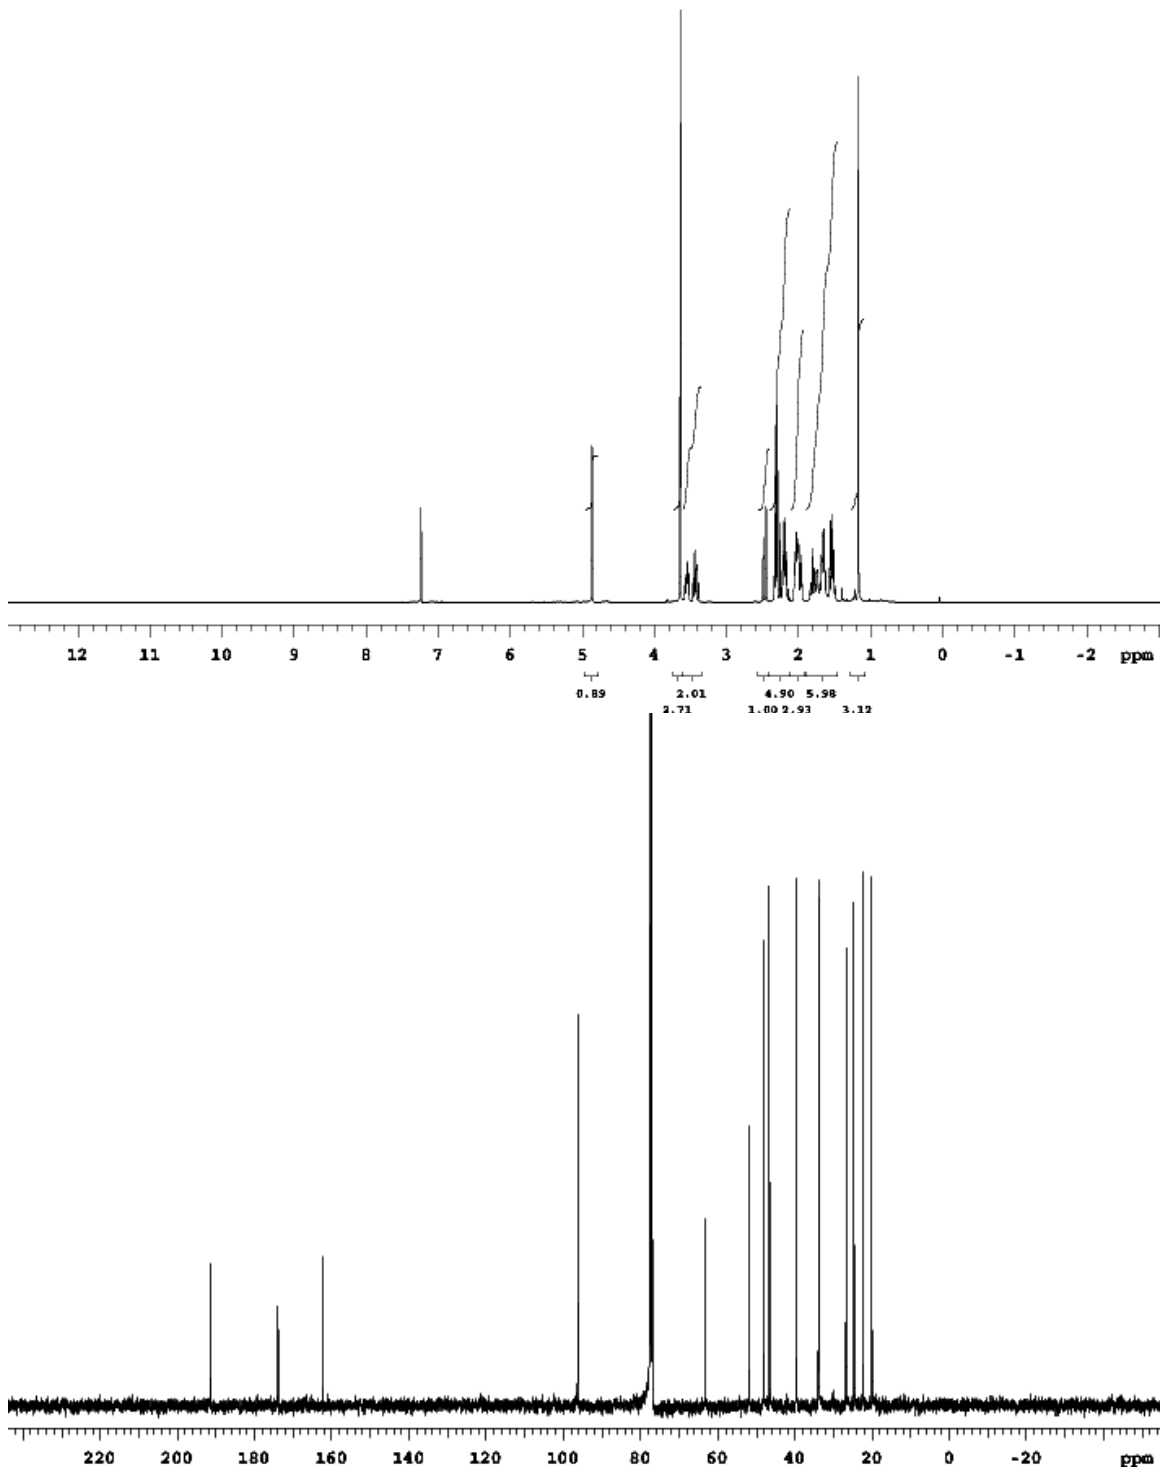

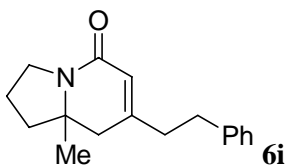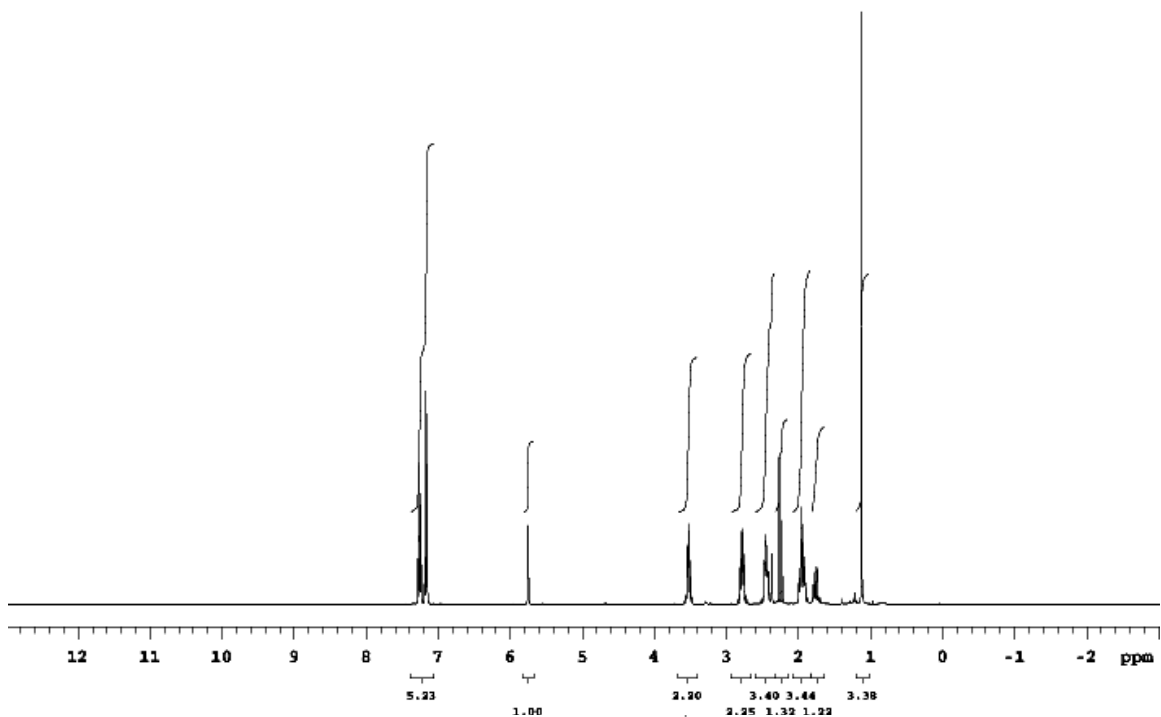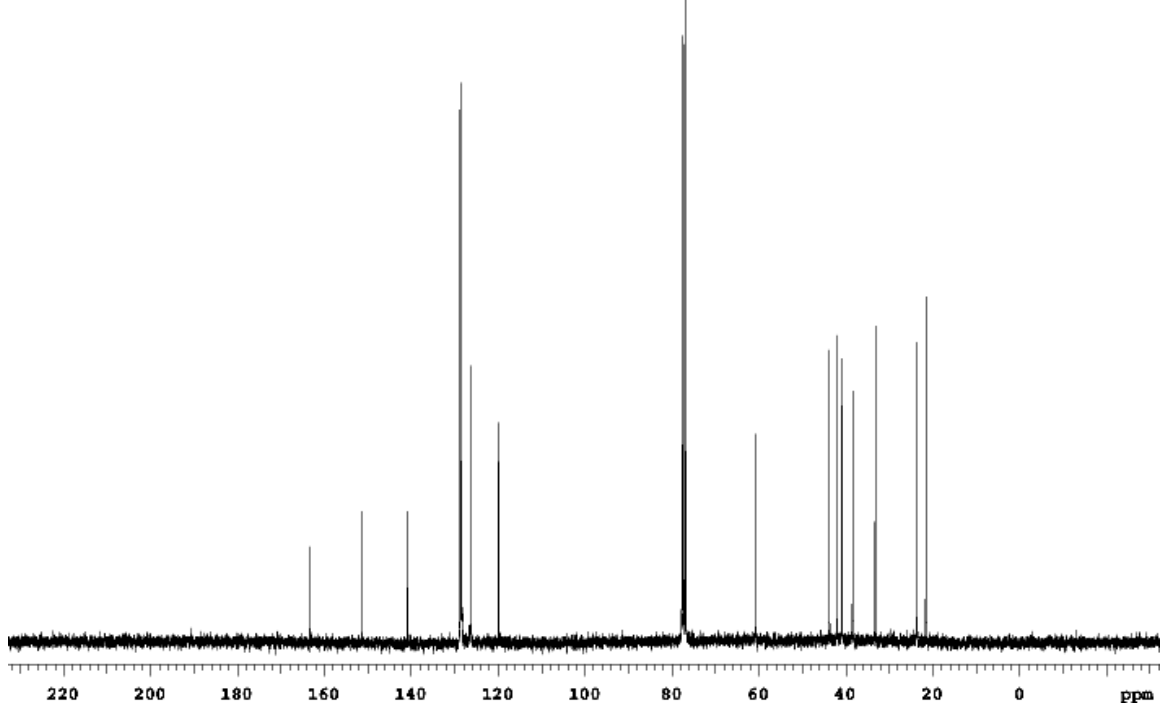

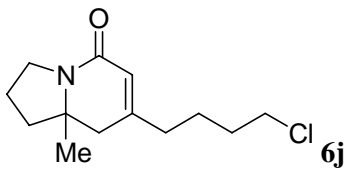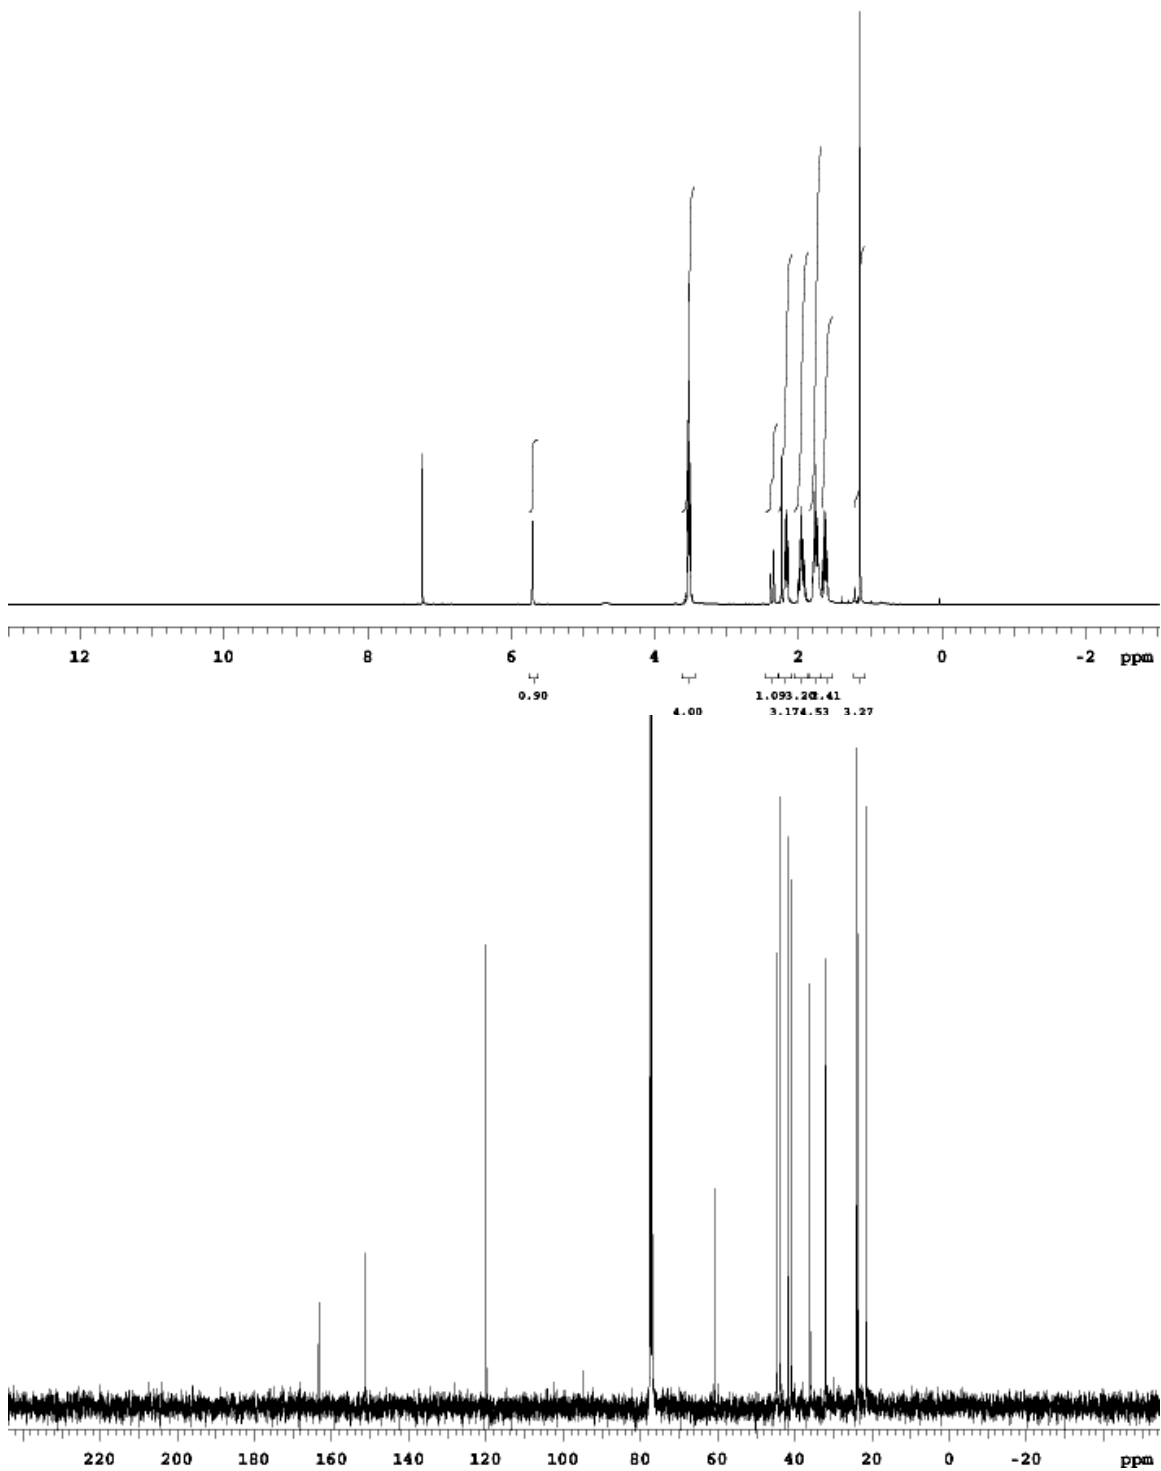

### I.12 Characterization of Pyridone Side Products.

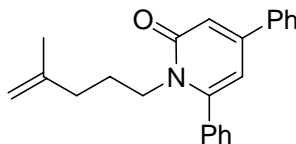

**1-(4-Methyl-pent-4-enyl)-4,6-diphenyl-1H-pyridin-2-one (8a):**  $R_f = 0.62$  (EtOAc(100%)); IR (Thin Film)  $\nu$  3059, 2935, 1654, 1602, 1537, 1490  $\text{cm}^{-1}$ ;  $^1\text{H}$  NMR (400 MHz,  $\text{CDCl}_3$ )  $\delta$  7.60-7.55 (2H, m), 7.48-7.35 (8H, m), 6.79 (1H, d,  $J = 2.0$  Hz), 6.32 (1H, d,  $J = 2.0$  Hz), 4.55 (1H, s), 4.47 (1H, s), 3.86 (2H, m), 1.85 (2H, t,  $J = 7.0$  Hz), 1.70 (2H, tt,  $J = 7.0$  Hz), 1.51 (sH, 3);  $^{13}\text{C}$  NMR (100 MHz,  $\text{CDCl}_3$ )  $\delta$  163.6, 150.5, 149.7, 144.6, 137.7, 135.9, 129.5, 129.4, 129.1, 128.9, 128.8, 127.0, 115.9, 110.5, 107.8, 45.5, 35.1, 26.5, 22.2; MS (EI)  $m/e$  (rel intensity) 330 (100), 260 (19), 248 (40), 247 (24), 179 (19), 167 (14); HRMS (EI)  $m/e$  calcd ( $\text{M}^+$ ) 330.1858, found 330.1853.

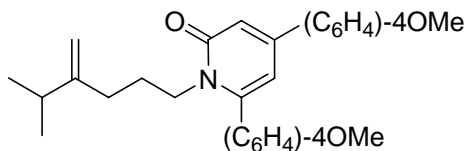

**4,6-Bis-(4-methoxy-phenyl)-1-(5-methyl-4-methylene-hexyl)-1H-pyridin-2-one (10g):**  $R_f = 0.60$  (EtOAc(100%)); IR (Thin Film)  $\nu$  2960, 1651, 1609, 1512, 1250, 1180, 1030  $\text{cm}^{-1}$ ;  $^1\text{H}$  NMR (400 MHz,  $\text{CDCl}_3$ )  $\delta$  7.51 (2H, d,  $J = 9.0$  Hz), 7.28 (2H, d,  $J = 8.5$  Hz), 6.96 (2H, d,  $J = 9.0$  Hz), 6.91 (2H, d,  $J = 9.0$  Hz), 6.72 (1H, d,  $J = 2.0$  Hz), 6.27 (1H, d,  $J = 2.0$  Hz), 4.59 (1H, s), 4.47 (1H, s), 3.89-3.83 (2H, m), 3.84 (3H, s), 3.80 (3H, s), 2.00 (1H, sept,  $J = 6.5$  Hz), 1.87 (2H, t,  $J = 7.5$  Hz), 1.69 (2H, tt,  $J = 7.5, 7.5$  Hz), 0.88 (6H, d,  $J = 7.0$  Hz);  $^{13}\text{C}$  NMR (100 MHz,  $\text{CDCl}_3$ )  $\delta$  163.7, 160.9, 160.3, 154.5, 149.8, 149.5, 130.2, 129.9, 128.3, 128.2, 114.5, 114.1, 107.8, 106.9, 55.6, 55.5, 45.6, 33.4, 31.8, 27.1, 21.9; HRMS (ESI)  $m/e$  calcd ( $\text{M}+\text{H}^+$ ) 418.2377, found 418.2379.

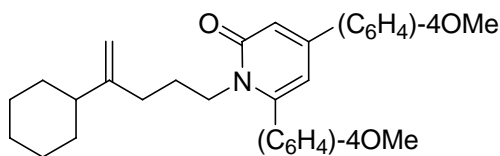

**1-(4-Cyclohexyl-pent-4-enyl)-4,6-bis-(4-methoxy-phenyl)-1H-pyridin-2-one (10h):**  $R_f = 0.60$  (EtOAc(100%)); IR (Thin Film)  $\nu$  2926, 2850, 1651, 1609, 1509, 1250, 1179, 1031, 824  $\text{cm}^{-1}$ ;  $^1\text{H}$  NMR (400 MHz,  $\text{CDCl}_3$ )  $\delta$  7.51 (2H, d,  $J = 9.0$  Hz), 7.28 (2H, d,  $J = 8.5$  Hz), 6.95 (2H, d,  $J = 9.0$  Hz), 6.91 (2H, d,  $J = 8.5$  Hz), 6.73 (1H, d,  $J = 1.5$  Hz), 6.27 (1H, d,  $J = 1.5$  Hz), 4.57 (1H, s), 4.48 (1H, s), 3.89-3.84 (2H, m), 3.85 (3H, s), 3.81 (3H, s), 1.87 (2H, t,  $J = 7.5$  Hz), 1.71-1.56 (8H, m), 1.23-0.96 (5H, m);  $^{13}\text{C}$  NMR (100 MHz,  $\text{CDCl}_3$ )  $\delta$  163.8, 160.9, 160.3, 153.9, 149.8, 149.4, 130.2, 129.9, 128.4, 128.2, 114.5, 114.1, 107.8, 107.4, 55.6, 45.6, 43.8, 32.5, 32.4, 27.3, 26.9, 26.6; HRMS (ESI)  $m/e$  calcd ( $\text{M}+\text{H}^+$ ) 458.2690, found 458.2667.

### I.13 Determination of Pyridone Isomer.

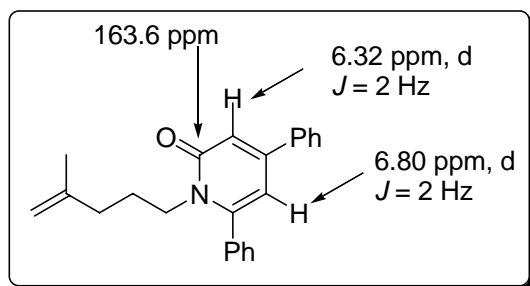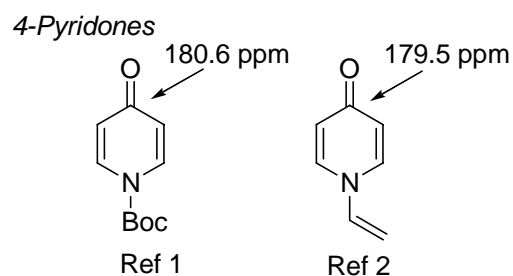

#### Matching isomer

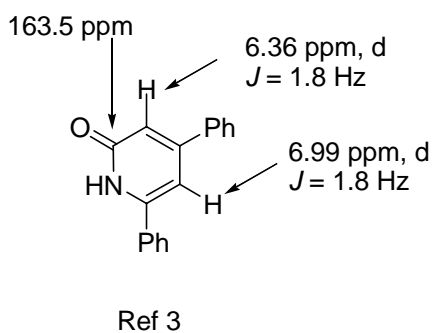

#### Non-matching isomers

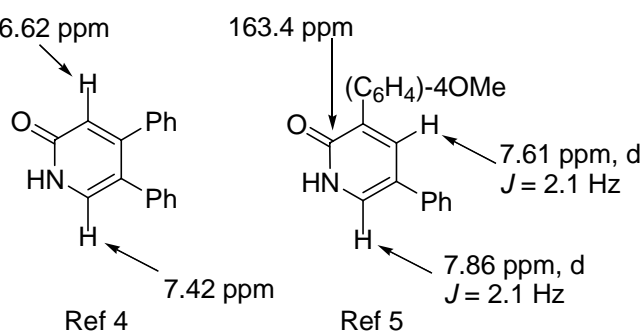

#### References

1. Lim, S. H.; Curtis, M. D.; Beak, P. *Org. Lett.* **2001**, *3*, 711-714.
2. Blouin, M.; Frenette, R. *J. Org. Chem.* **2001**, *66*, 9043-9045.
3. Carles, L.; Narkunam, K.; Penlou, S.; Rousset, L.; Bouchu, D.; Ciufolini, M. A. *J. Org. Chem.* **2002**, *67*, 4304-4308.
4. Yamamoto, K.; Yamazaki, S.; Murata, I. *J. Org. Chem.* **1987**, *52*, 5239-5243.
5. Sutherland, A.; Gallagher, T. *J. Org. Chem.* **2003**, *68*, 3352-3355.

### I.14 Pyridone Byproduct <sup>1</sup>H and <sup>13</sup>C NMR Spectra

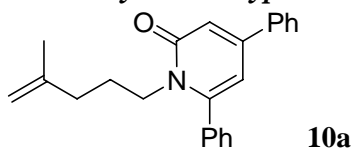

STANDARD IN OBSERVE

el\_1\_109\_1

solvent: CDCl3

Ambient temperature

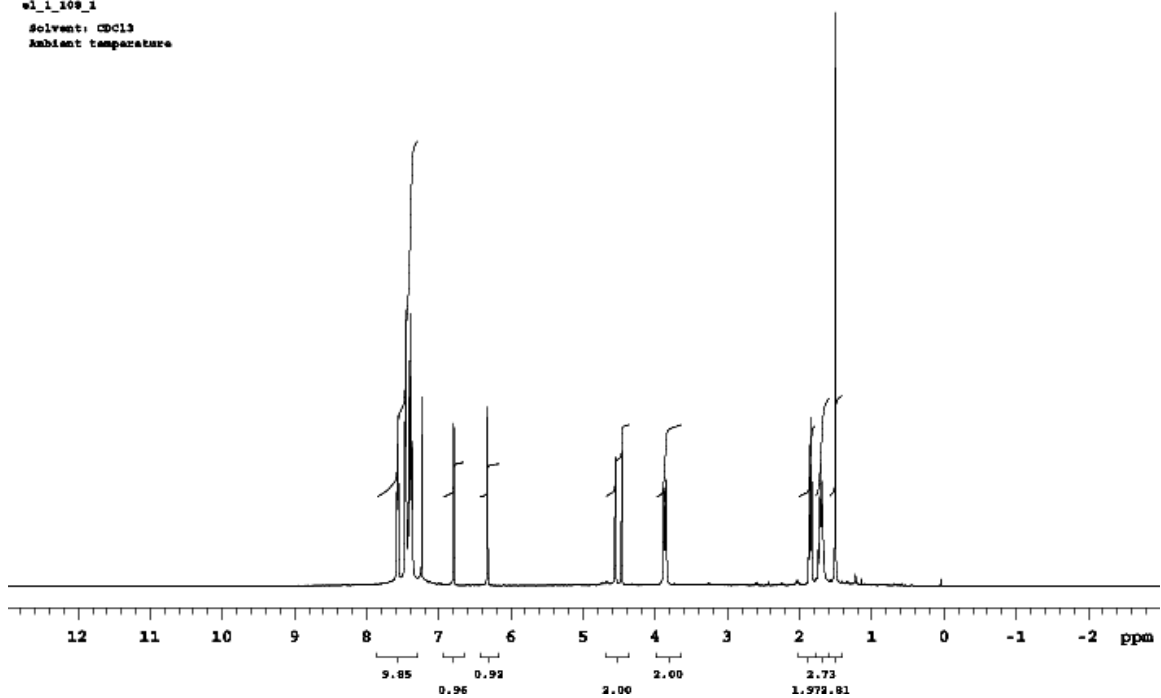

13C OBSERVE

solvent: CDCl3

Ambient temperature

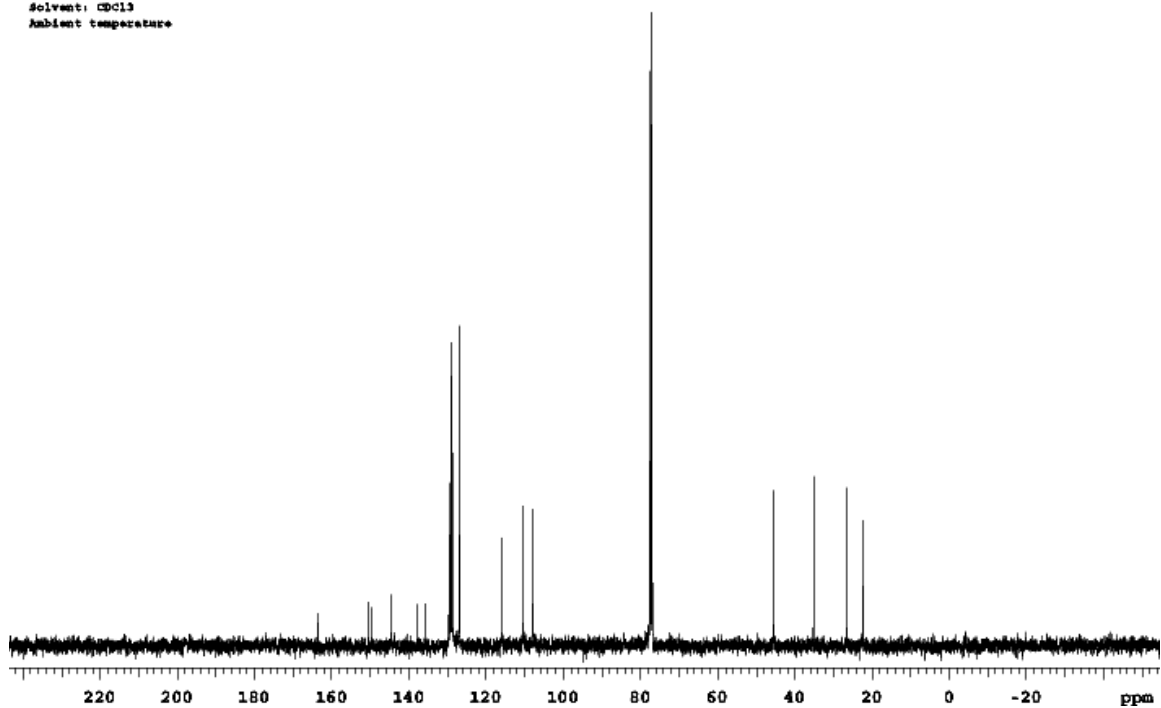

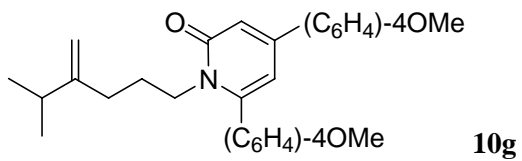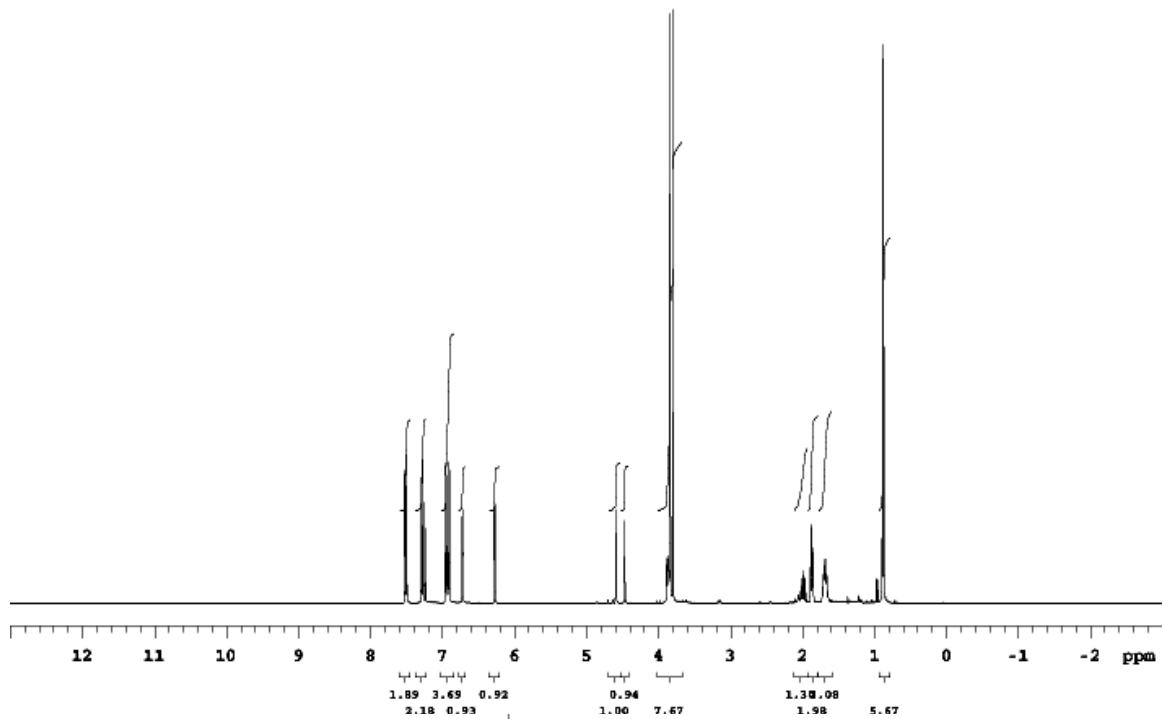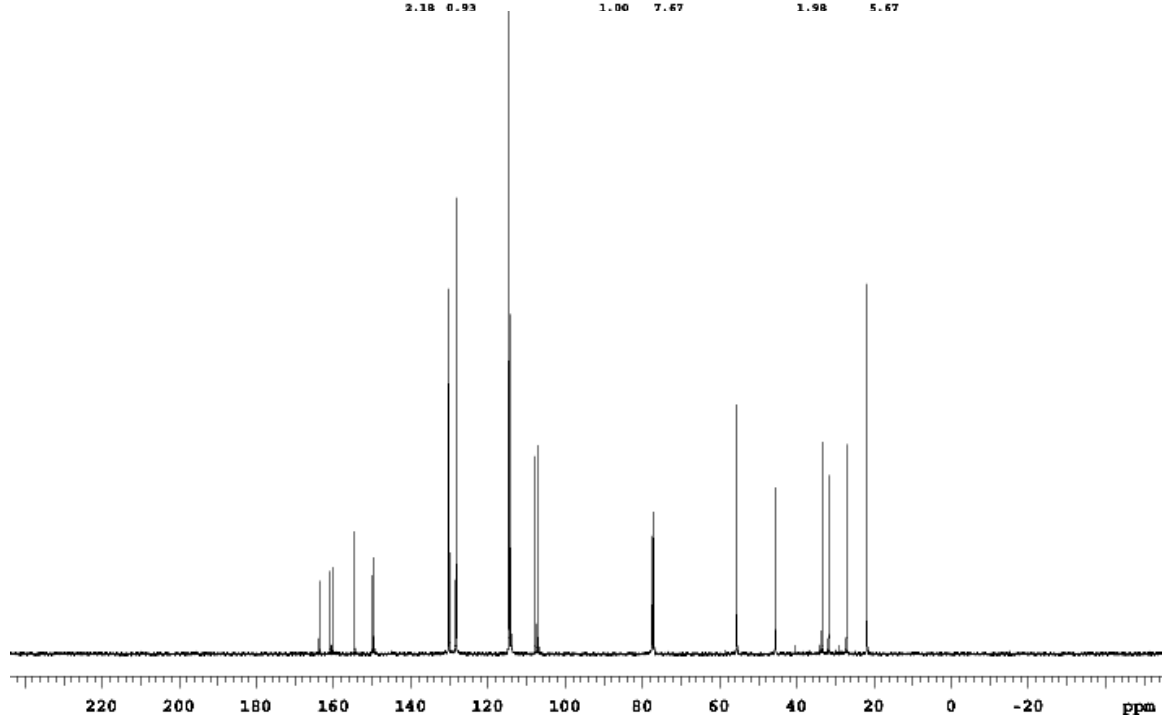



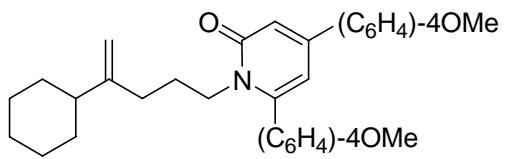

10h

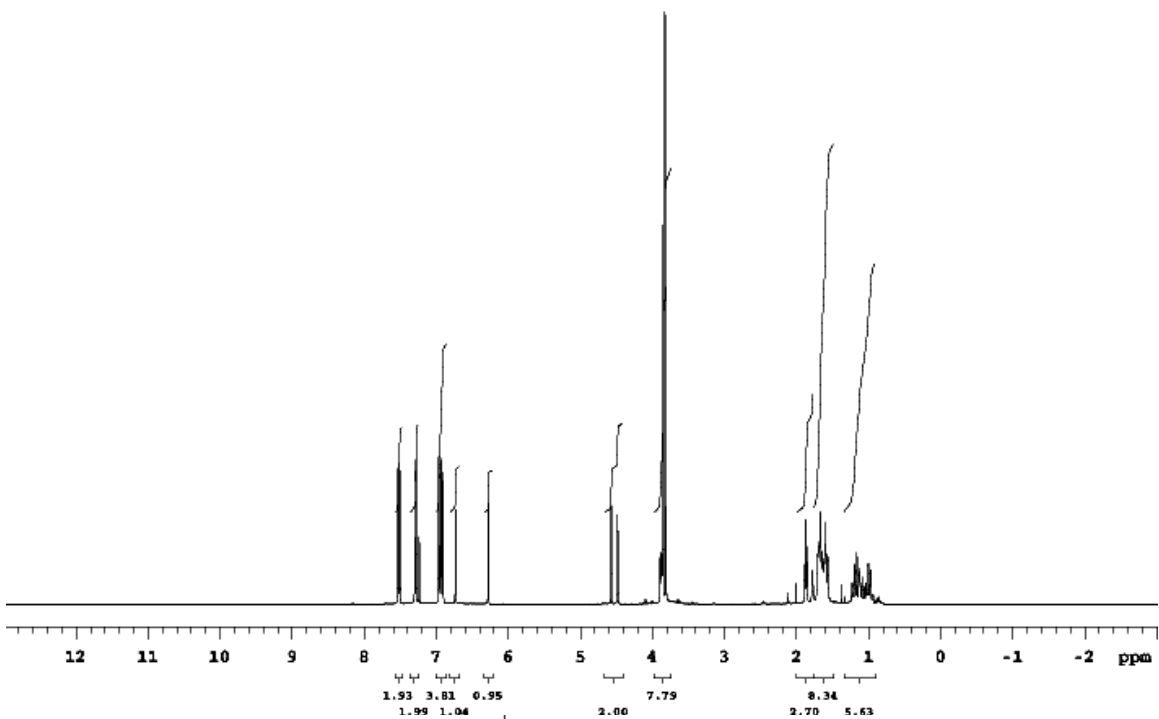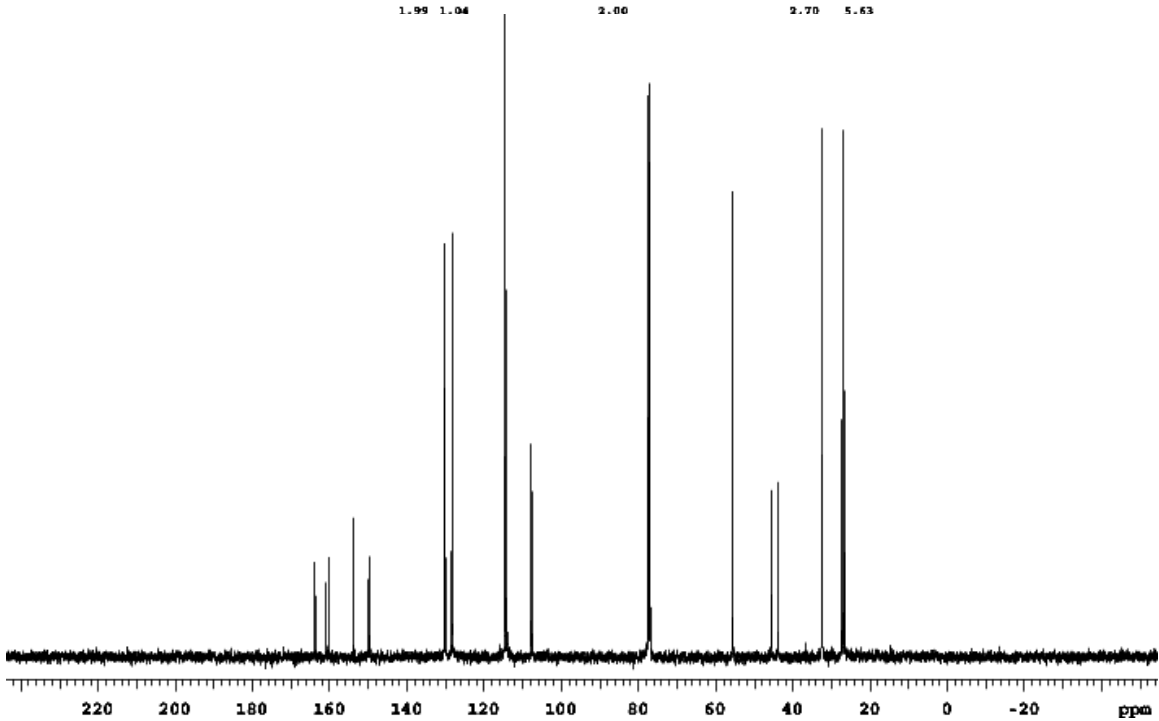

Supplement: NIHMS140165-supplement-Supplementary.pdf [file NIHMS140165-supplement-Supplementary.pdf]
